# Supplementary material for: General Method of Synthesis of 5-(Het)arylamino-1,2,3-triazoles via Buchwald–Hartwig Reaction of 5-Amino- or 5-Halo-1,2,3-triazoles
Source: MDPI journal article supplement (doi:10.3390/molecules27061999), 2022-03-20
Supplement: s1 [file s1]

**Supporting information *for***  
**General method of synthesis of 5-(het)arylamino-1,2,3-triazoles *via***  
**Buchwald–Hartwig reaction of 5-amino- or 5-halo-1,2,3-triazoles**

Pavel S. Griбанov, Anna N. Philippova, Maxim A. Topchiy, Lidiya I. Minaeva, Andrey F.  
Asachenko, and Sergey N. Osipov

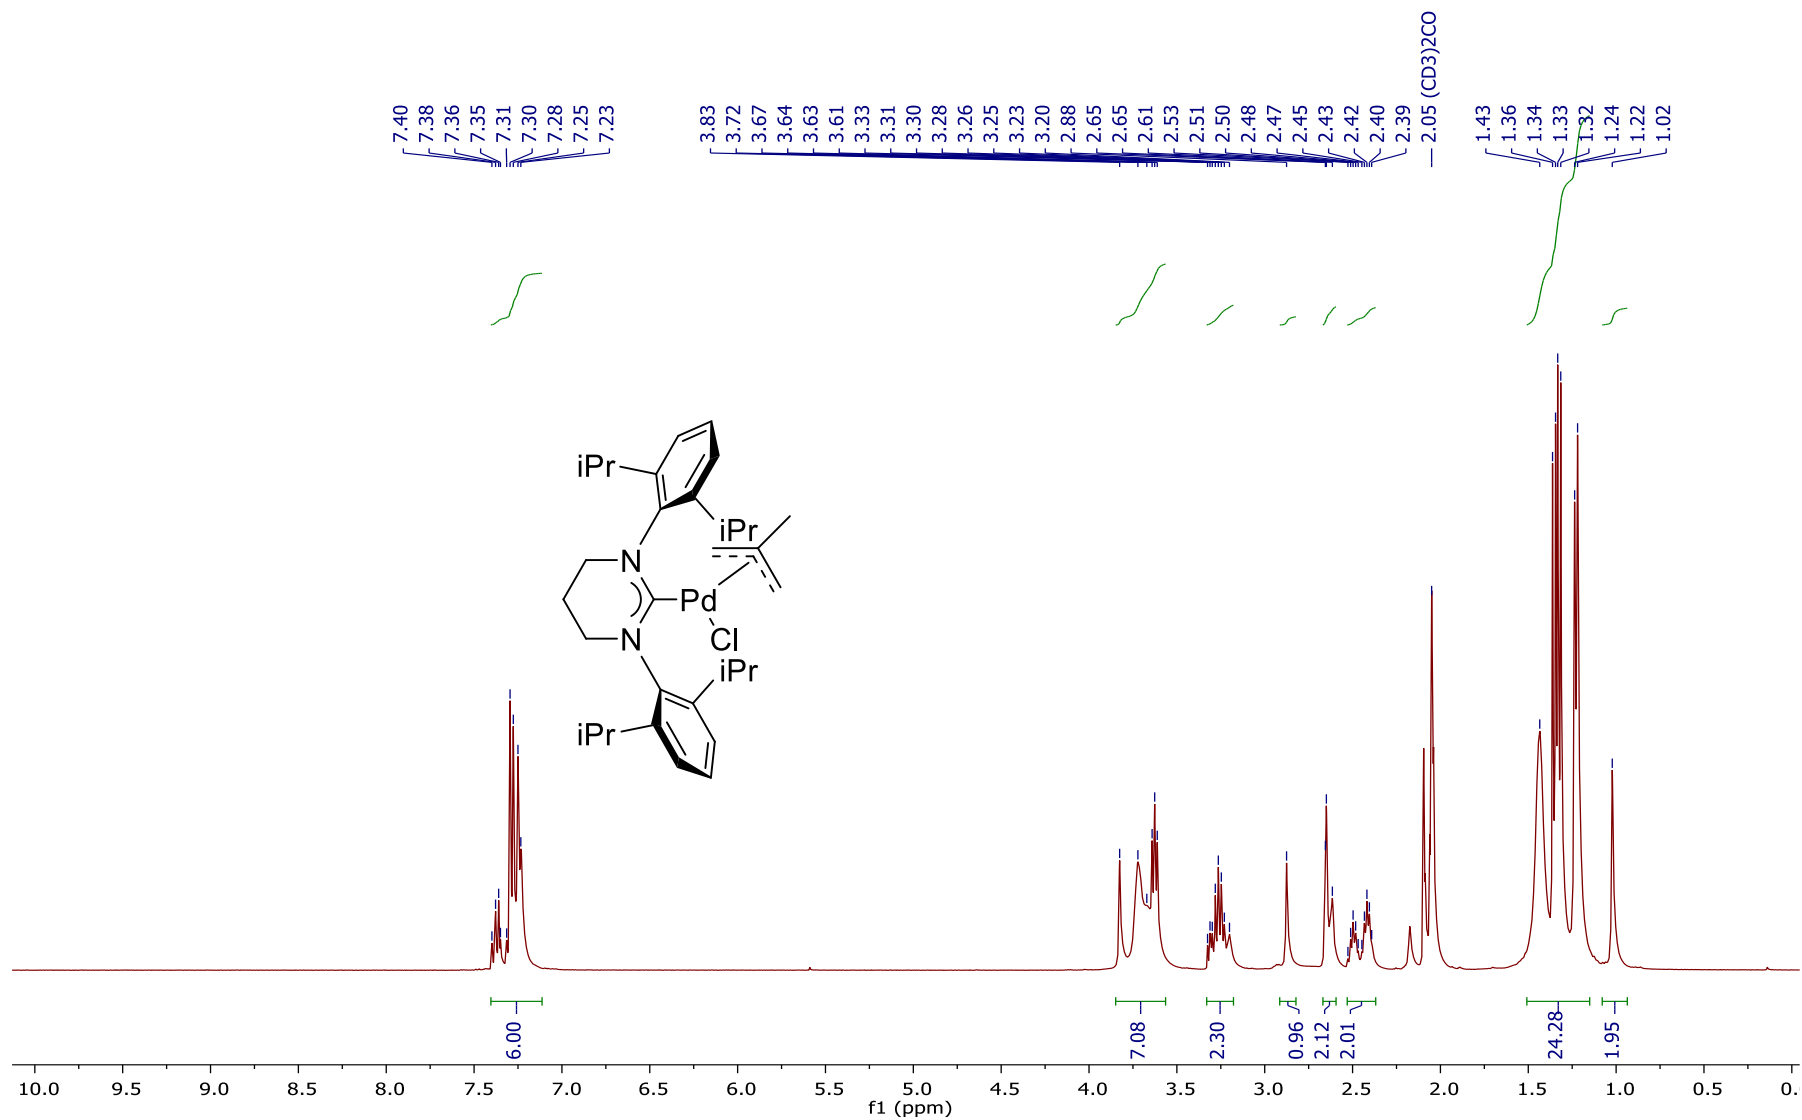

**Figure S1. <sup>1</sup>H NMR (400 MHz, Acetone-d<sub>6</sub>) of (THP-Dipp)Pd(methallyl)Cl**

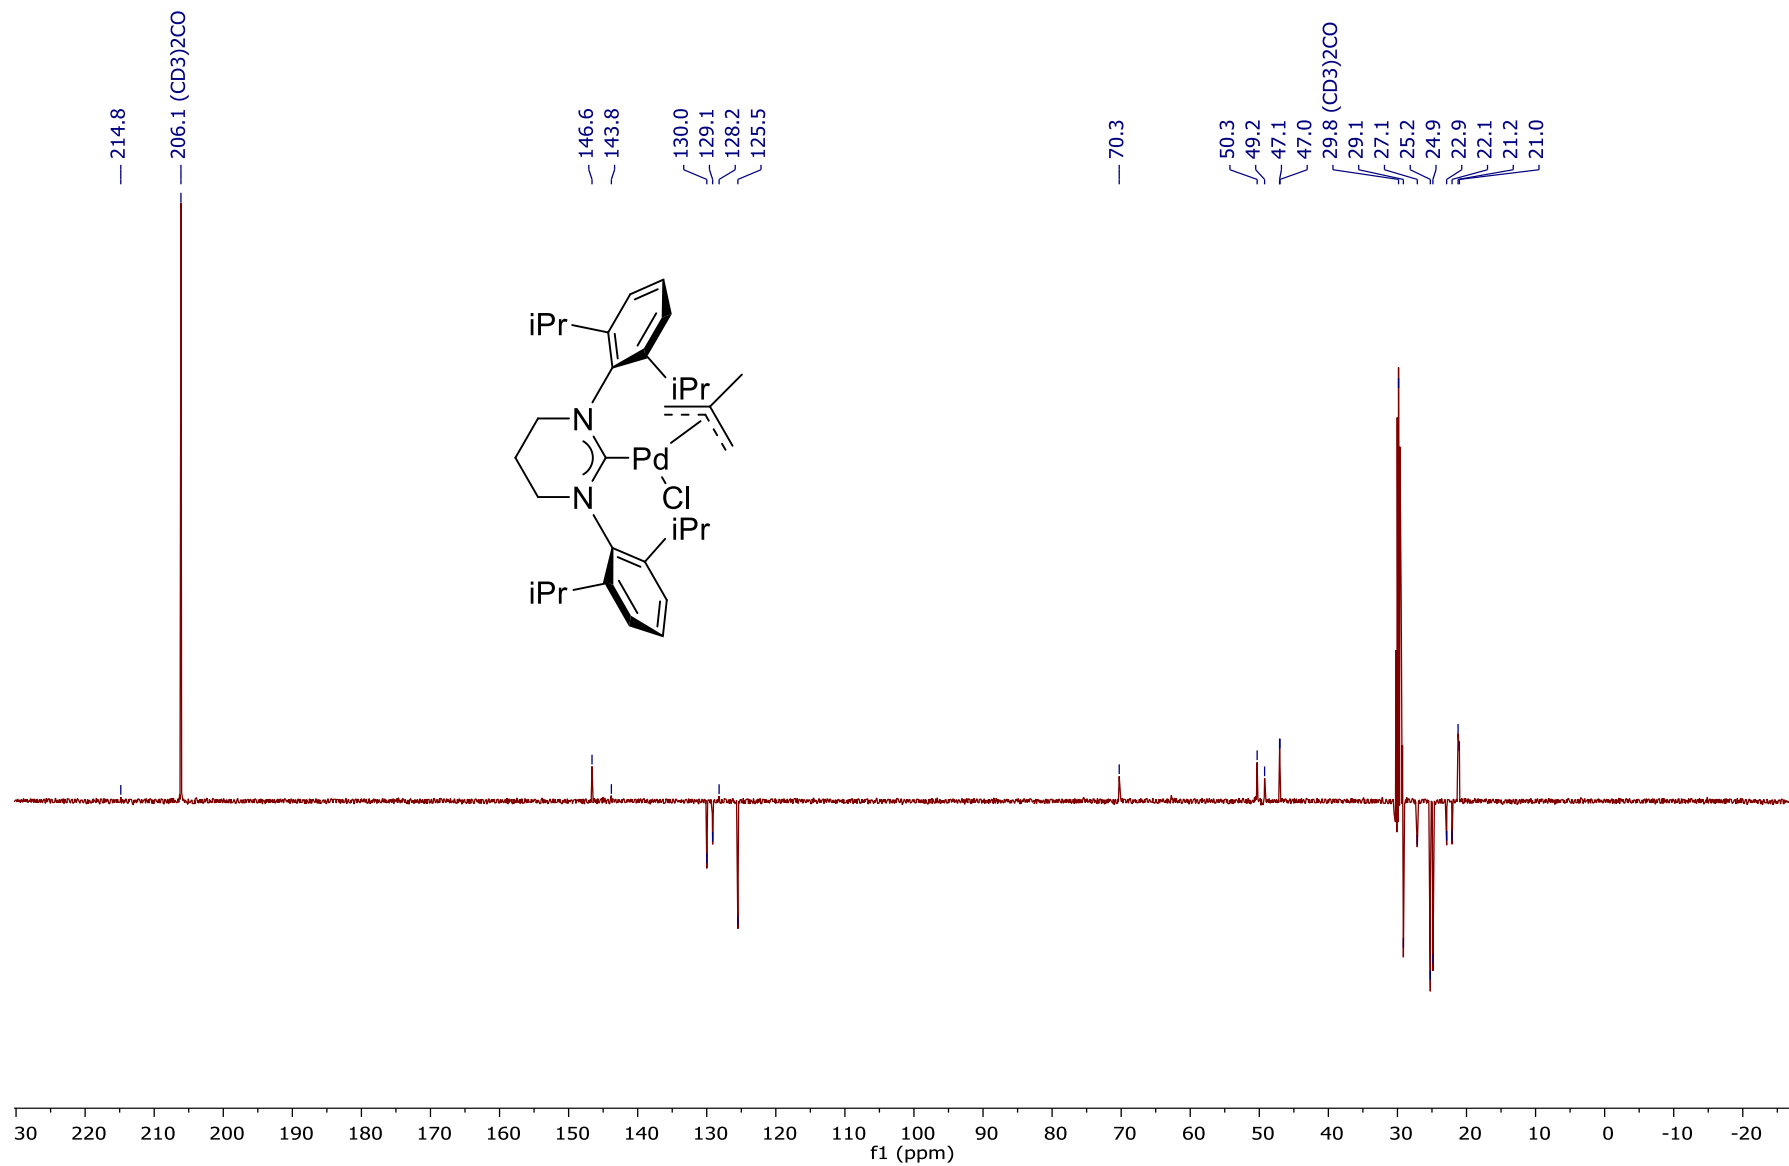

Figure S2.  $^{13}\text{C}$  DEPTQ-135 NMR (101 MHz, Acetone- $\text{d}_6$ ) of  $(\text{THP-Dipp})\text{Pd}(\text{methallyl})\text{Cl}$

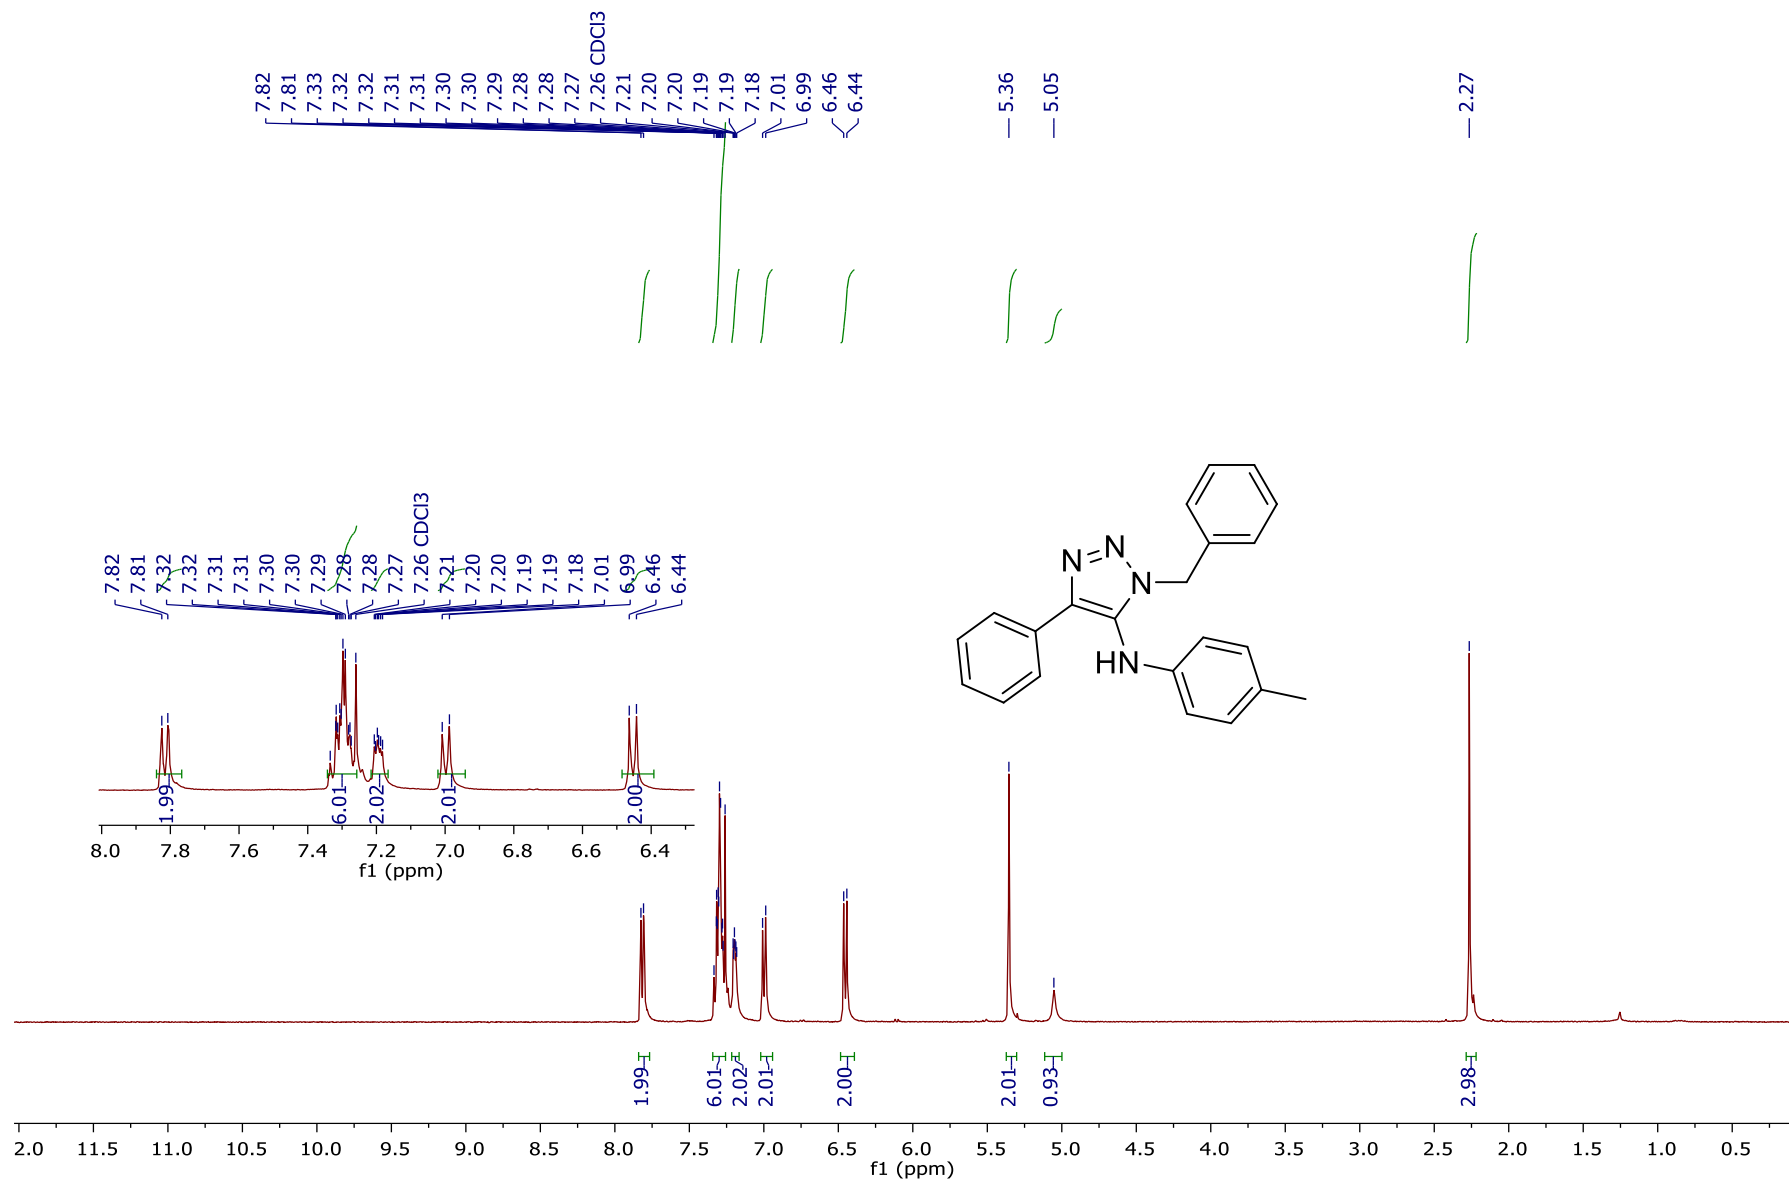

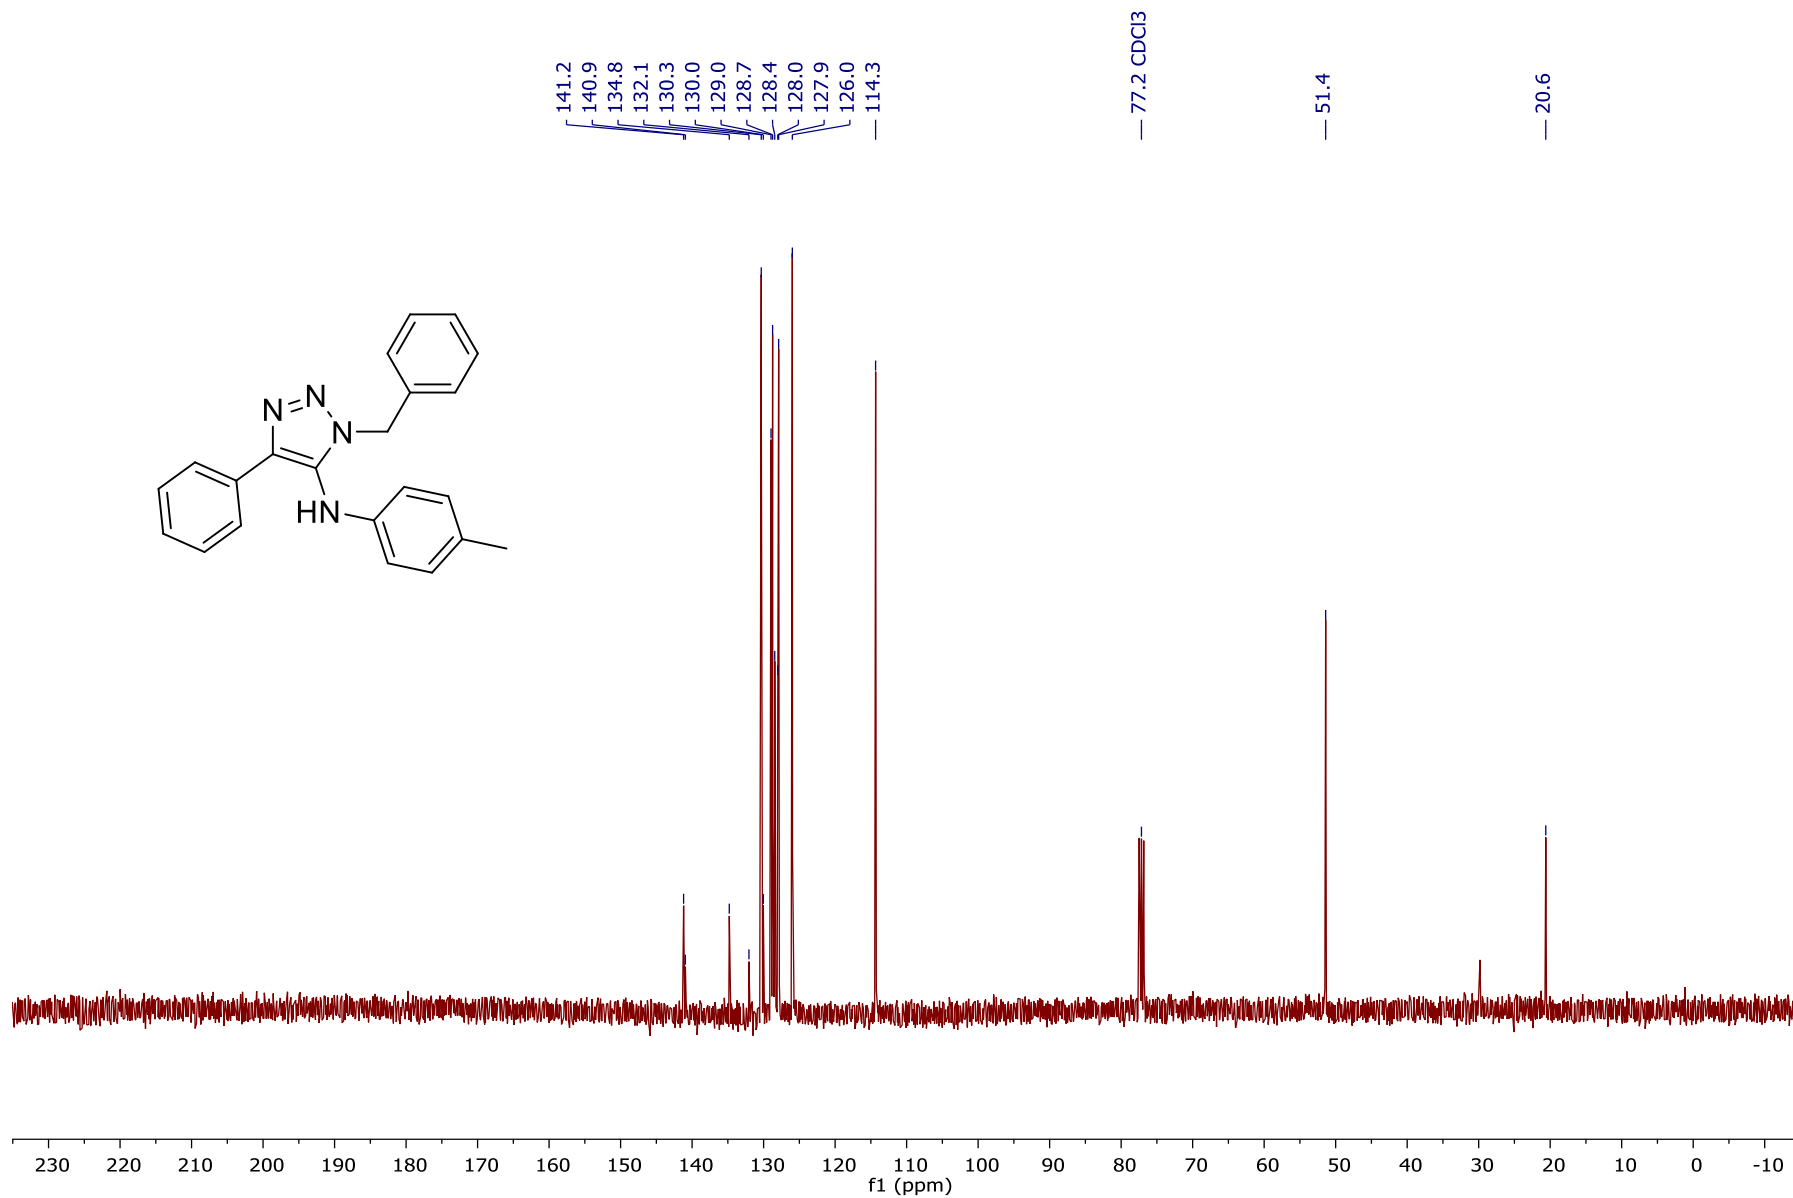

Figure S4.  $^{13}\text{C}\{^1\text{H}\}$  NMR (101 MHz, Chloroform-*d*) of 2a

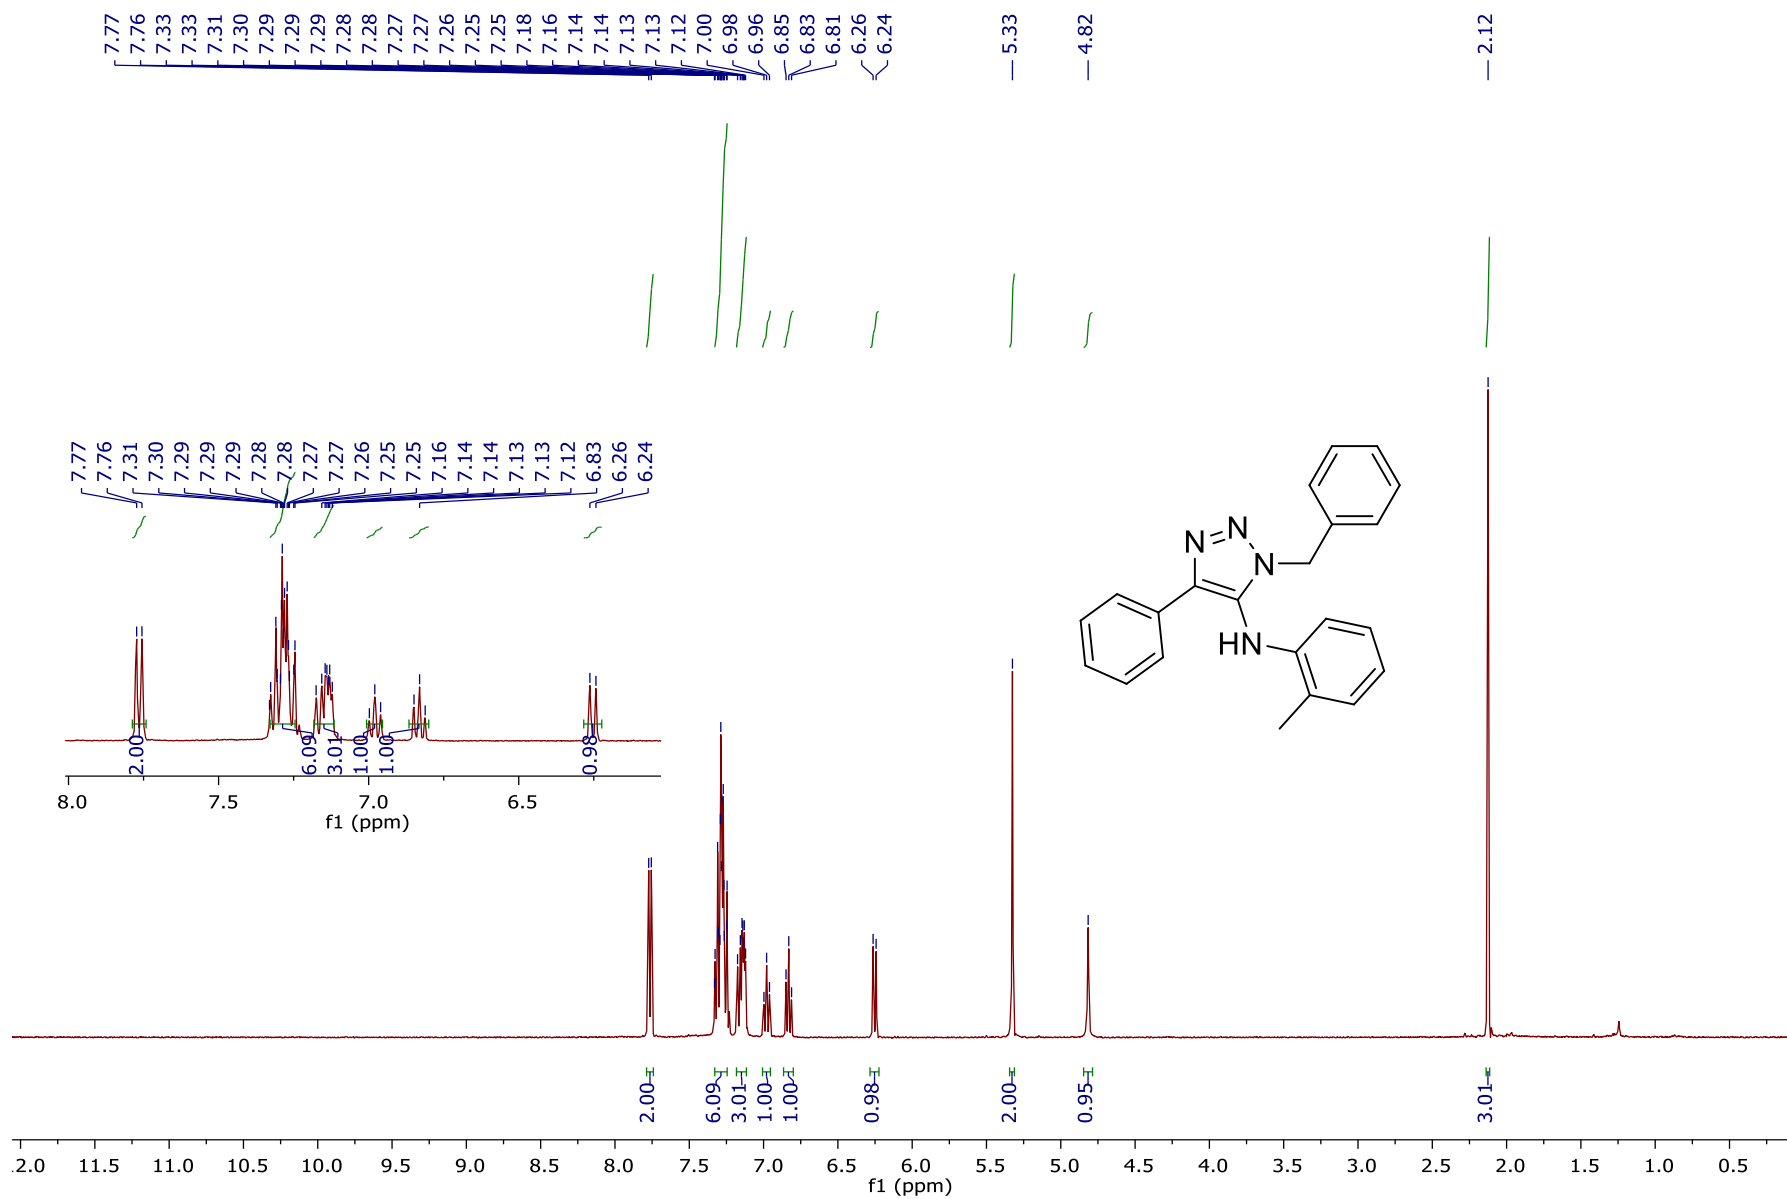

Figure S5. <sup>1</sup>H NMR (400 MHz, Chloroform-*d*) of 2b

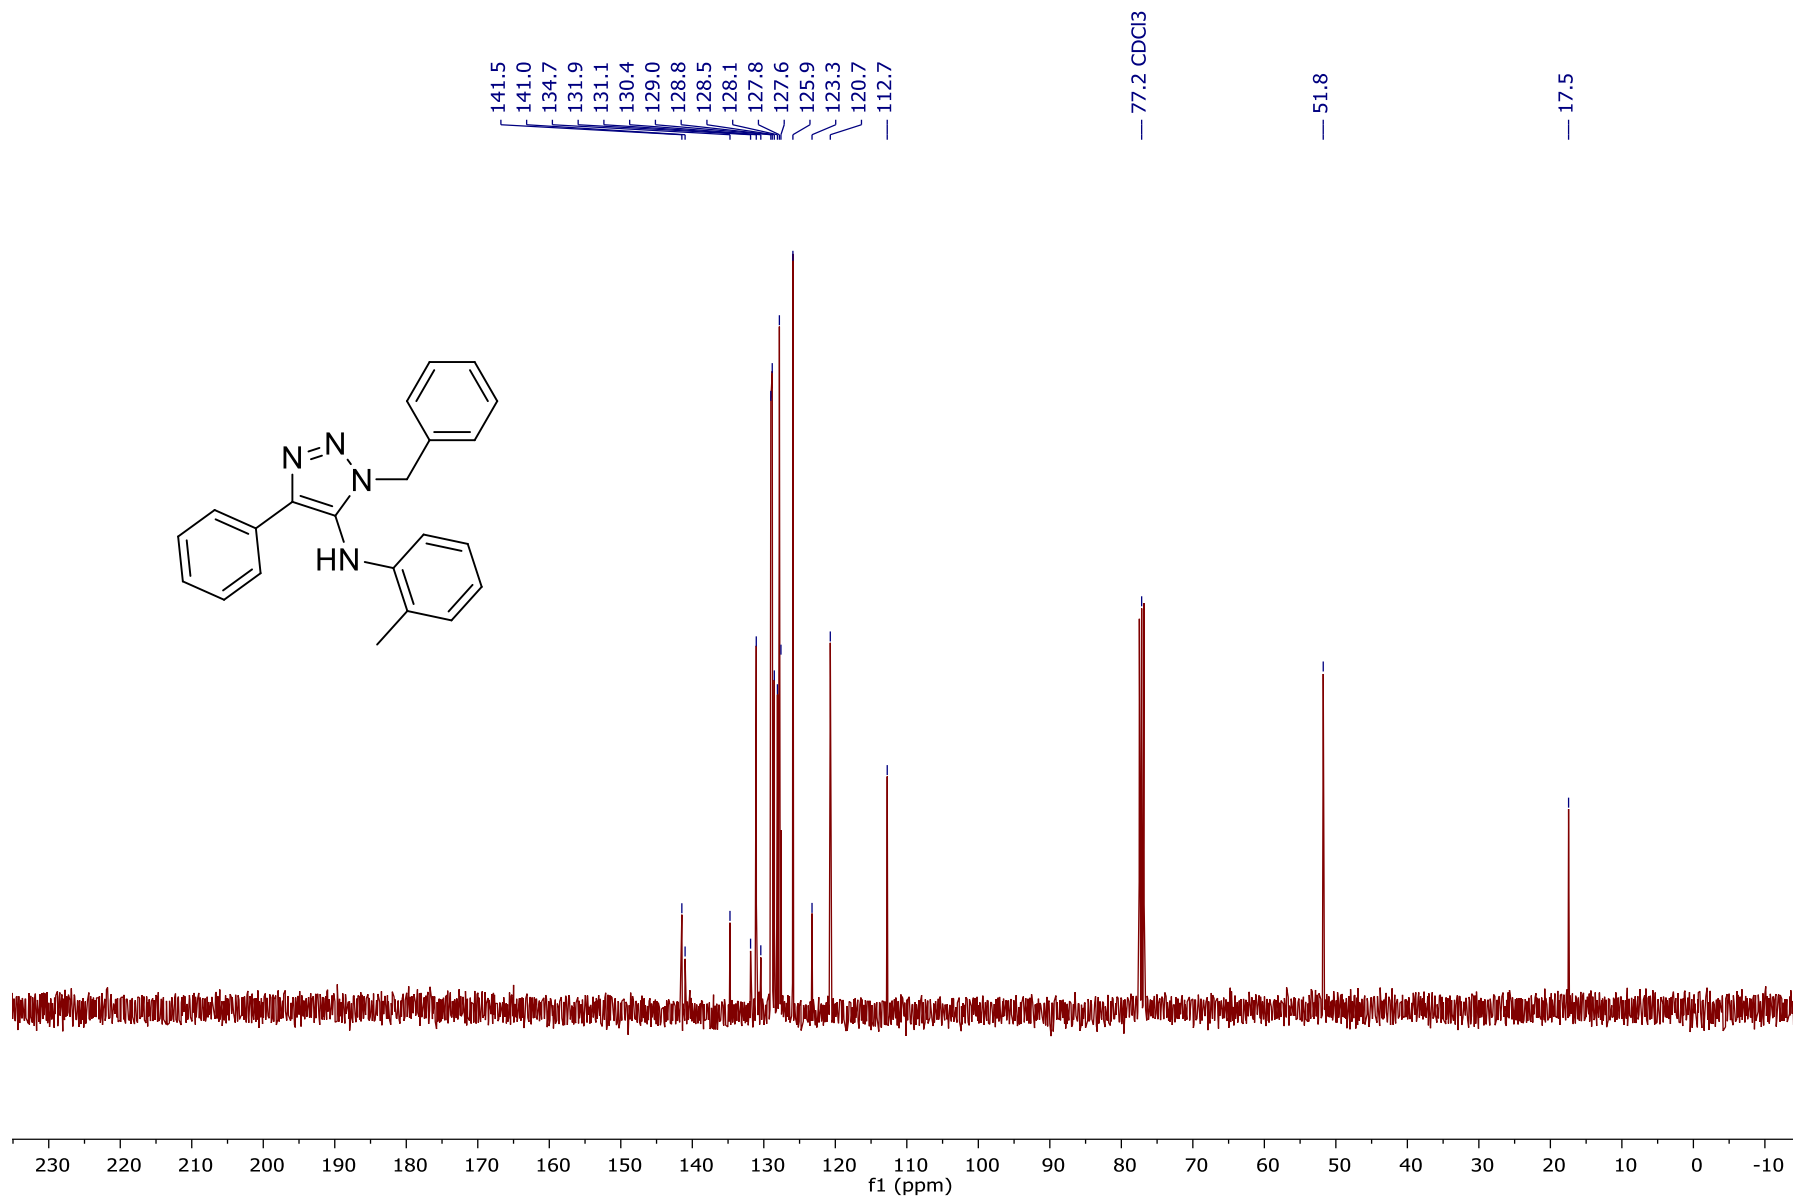

Figure S6.  $^{13}\text{C}\{^1\text{H}\}$  NMR (101 MHz, Chloroform-*d*) of 2b





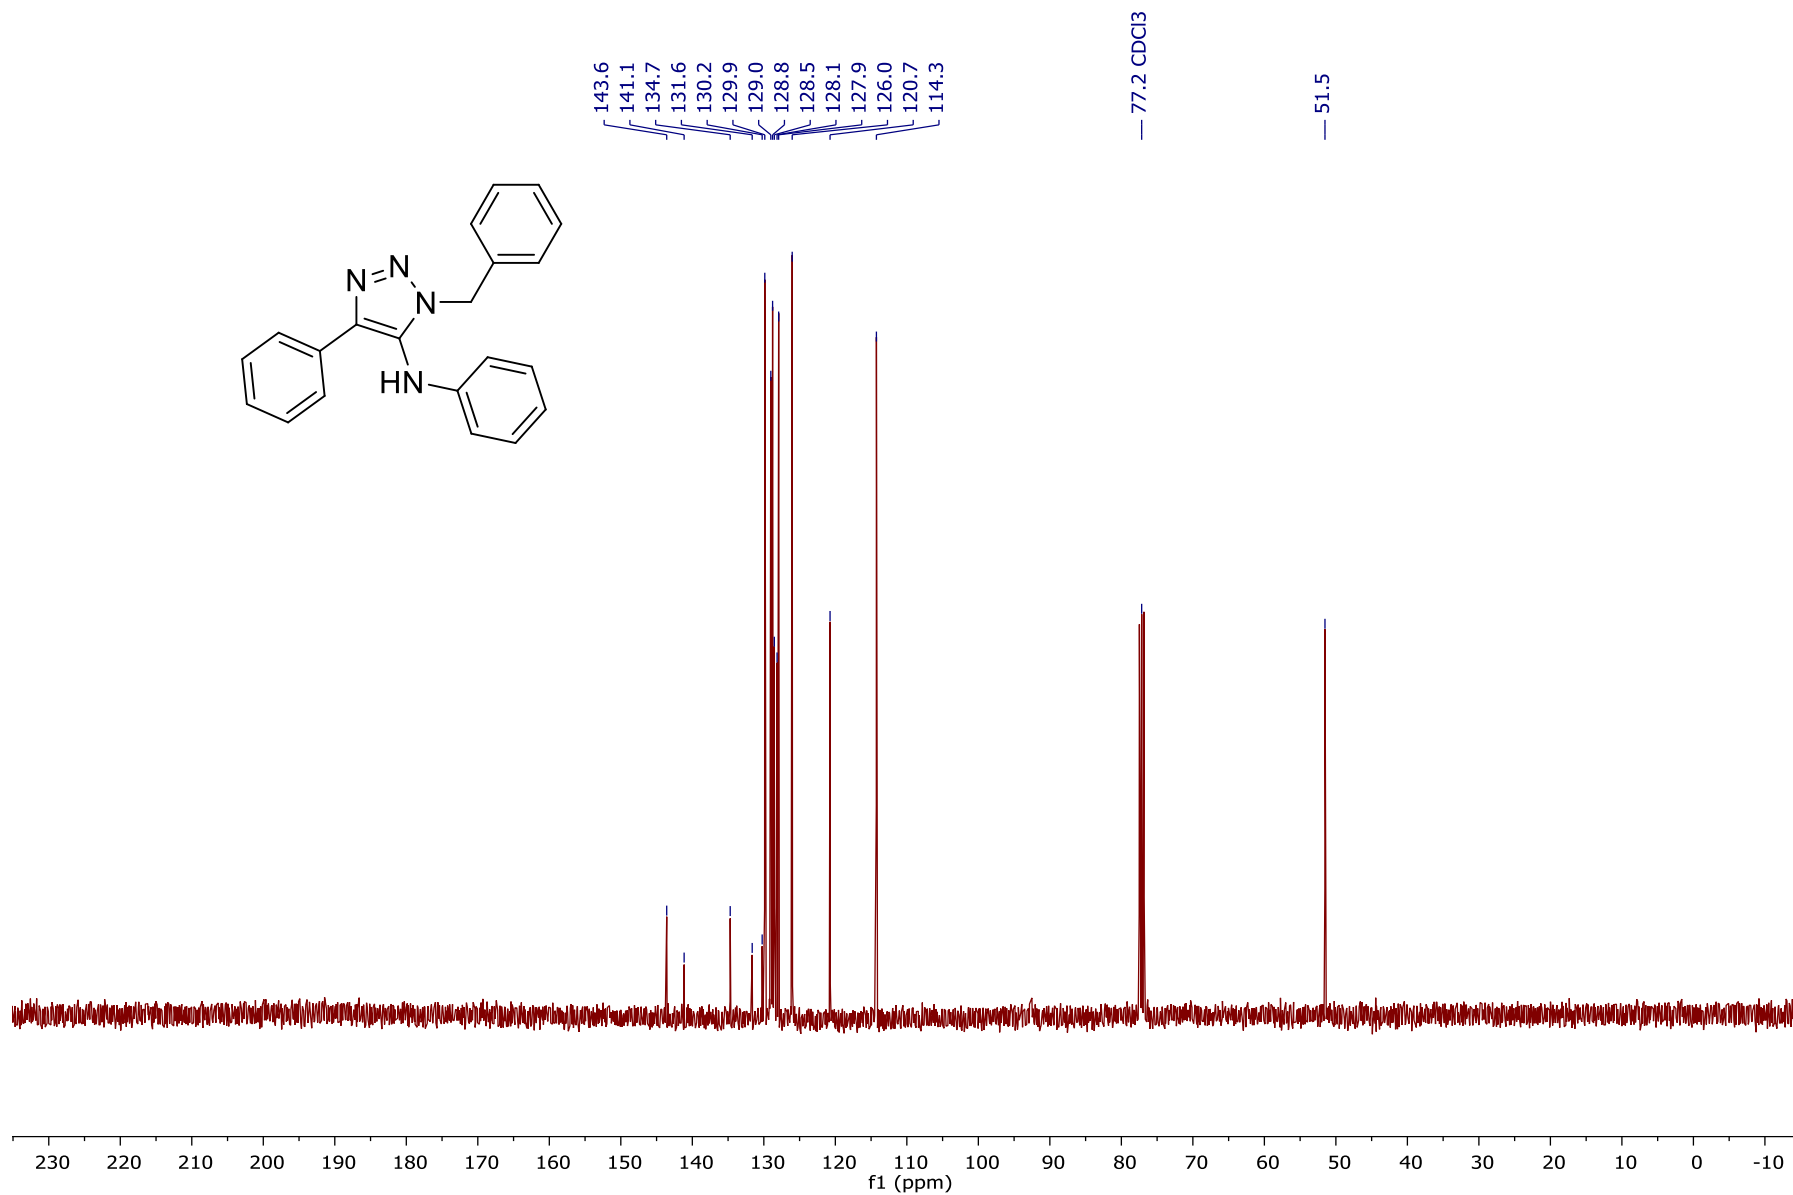

Figure S8.  $^{13}\text{C}\{^1\text{H}\}$  NMR (101 MHz, Chloroform-*d*) of 2c

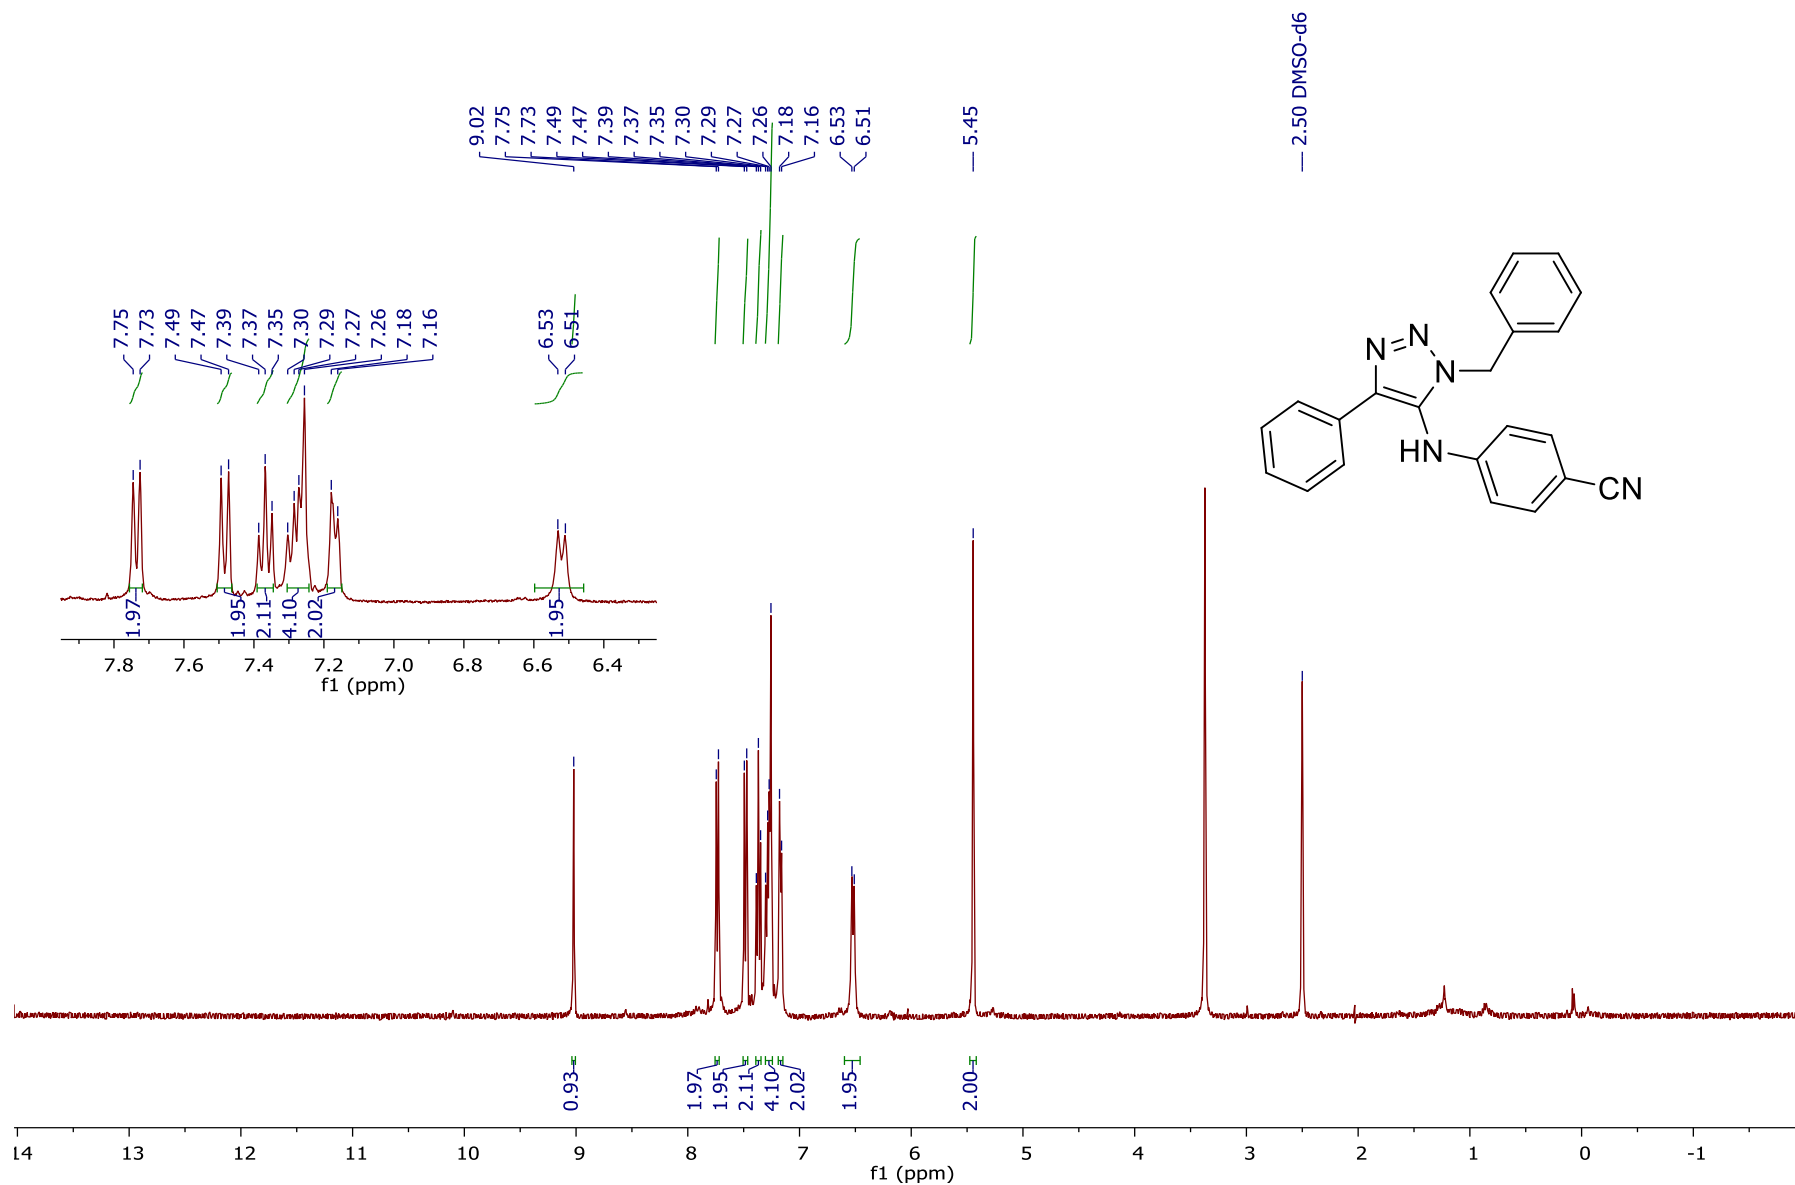

Figure S9. <sup>1</sup>H NMR (400 MHz, DMSO-d<sub>6</sub>) of 2d

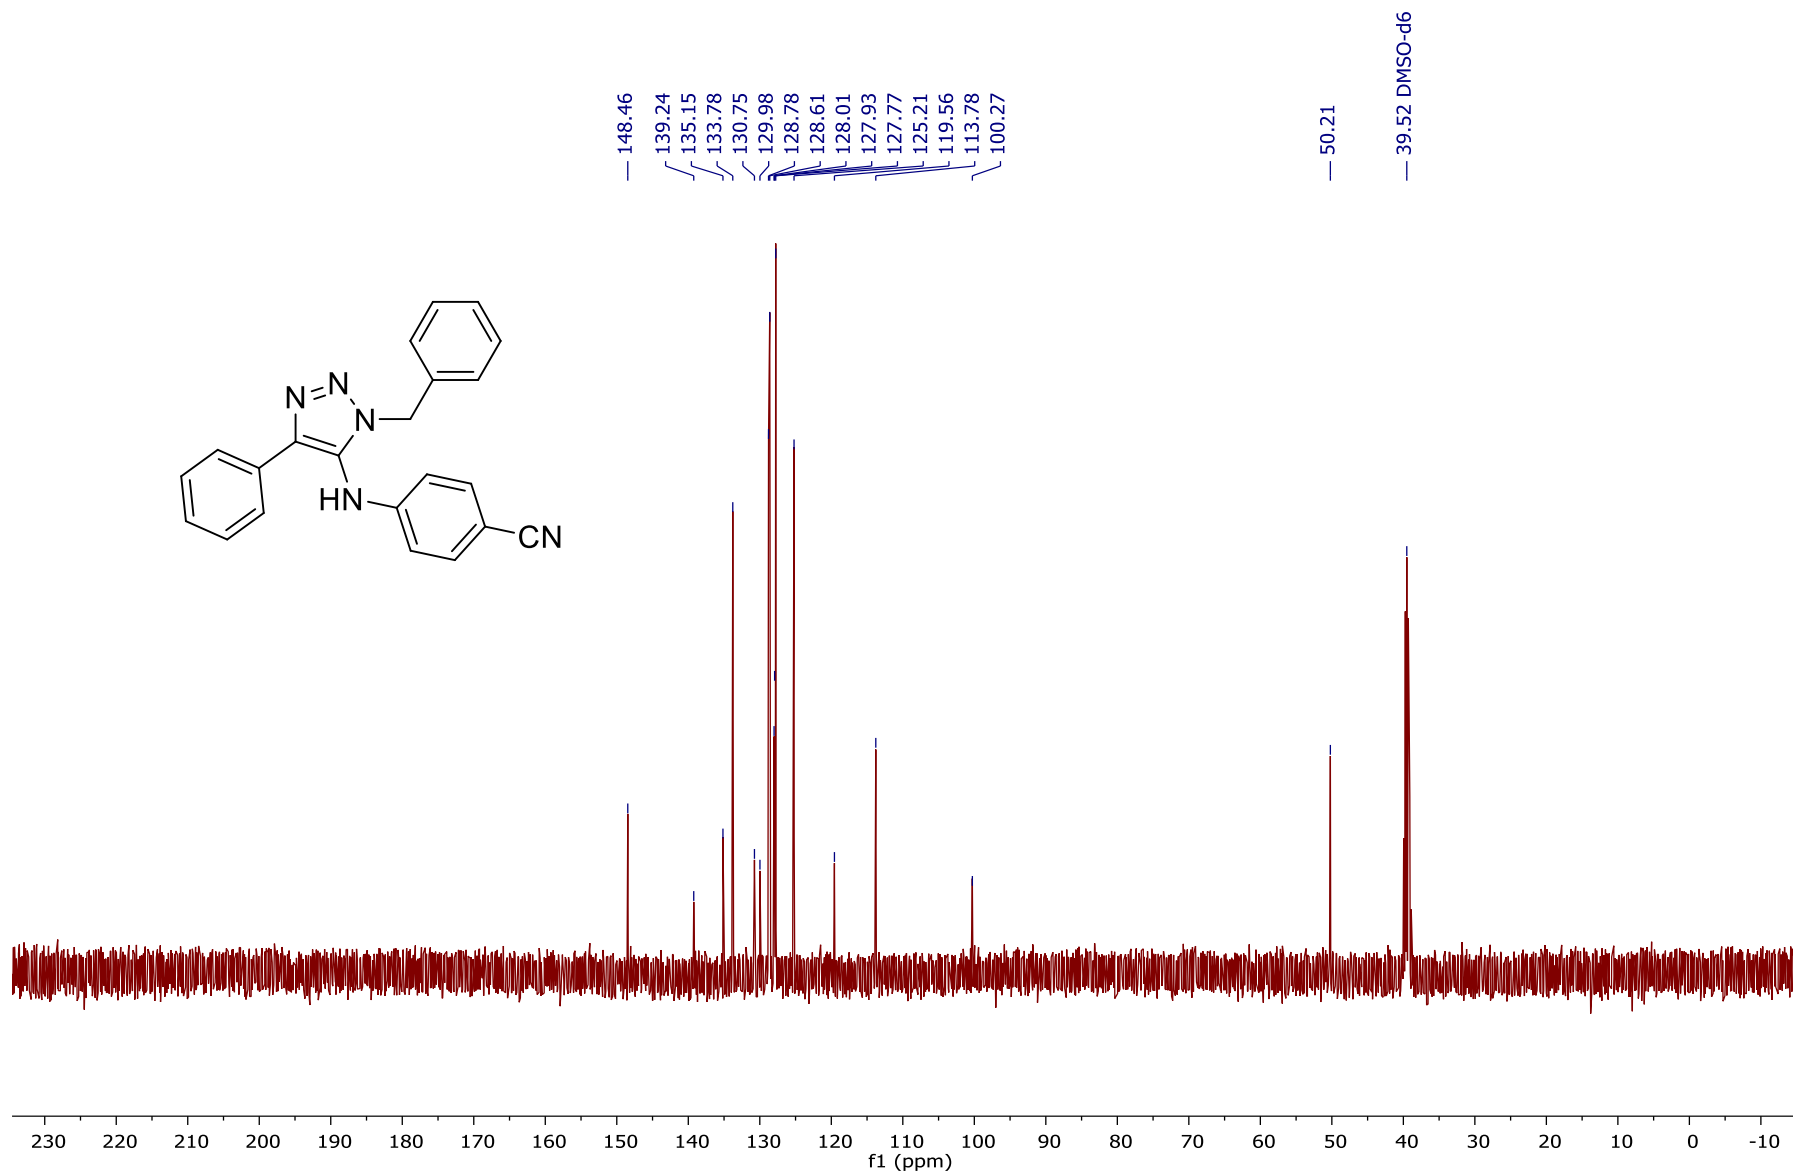

Figure S10.  $^{13}\text{C}\{^1\text{H}\}$  NMR (101 MHz, DMSO- $d_6$ ) of 2d

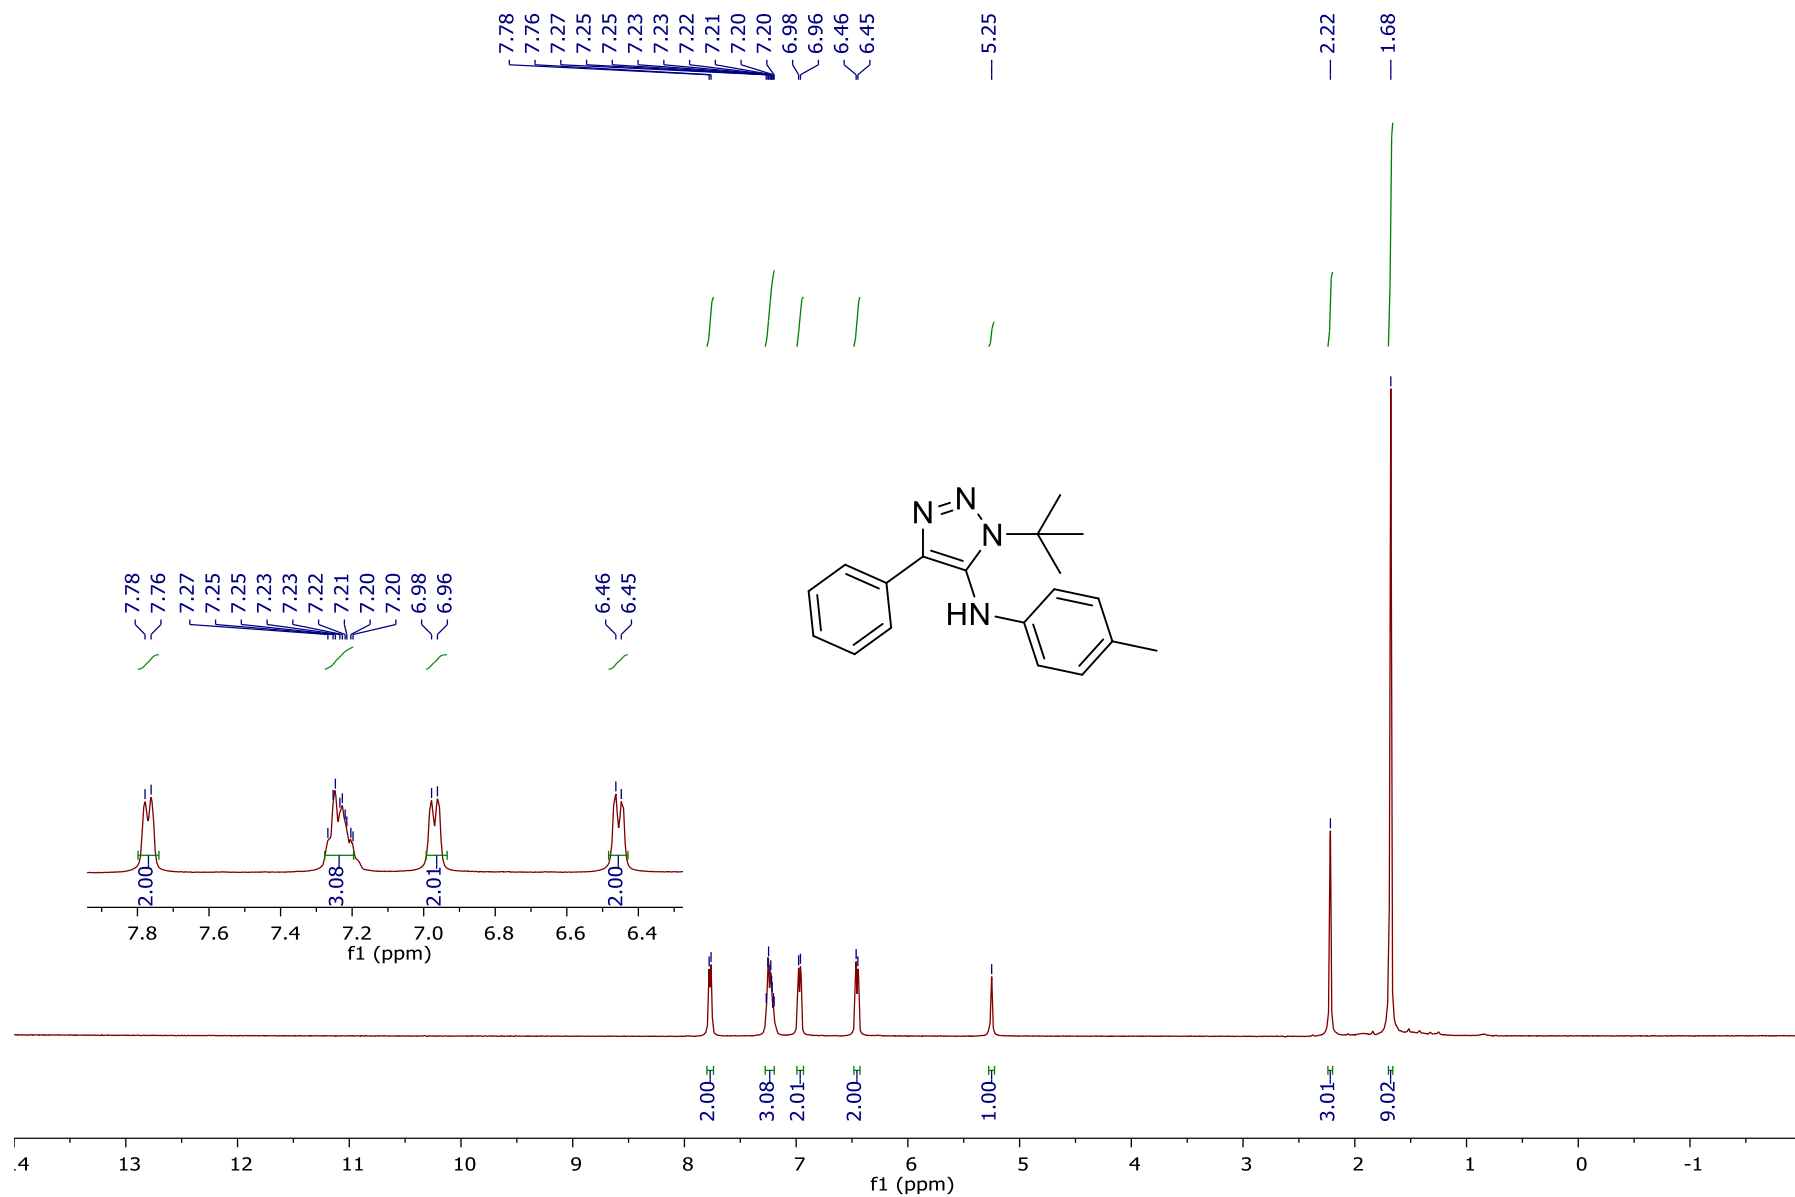

Figure S11. <sup>1</sup>H NMR (400 MHz, Chloroform-*d*) of 2c

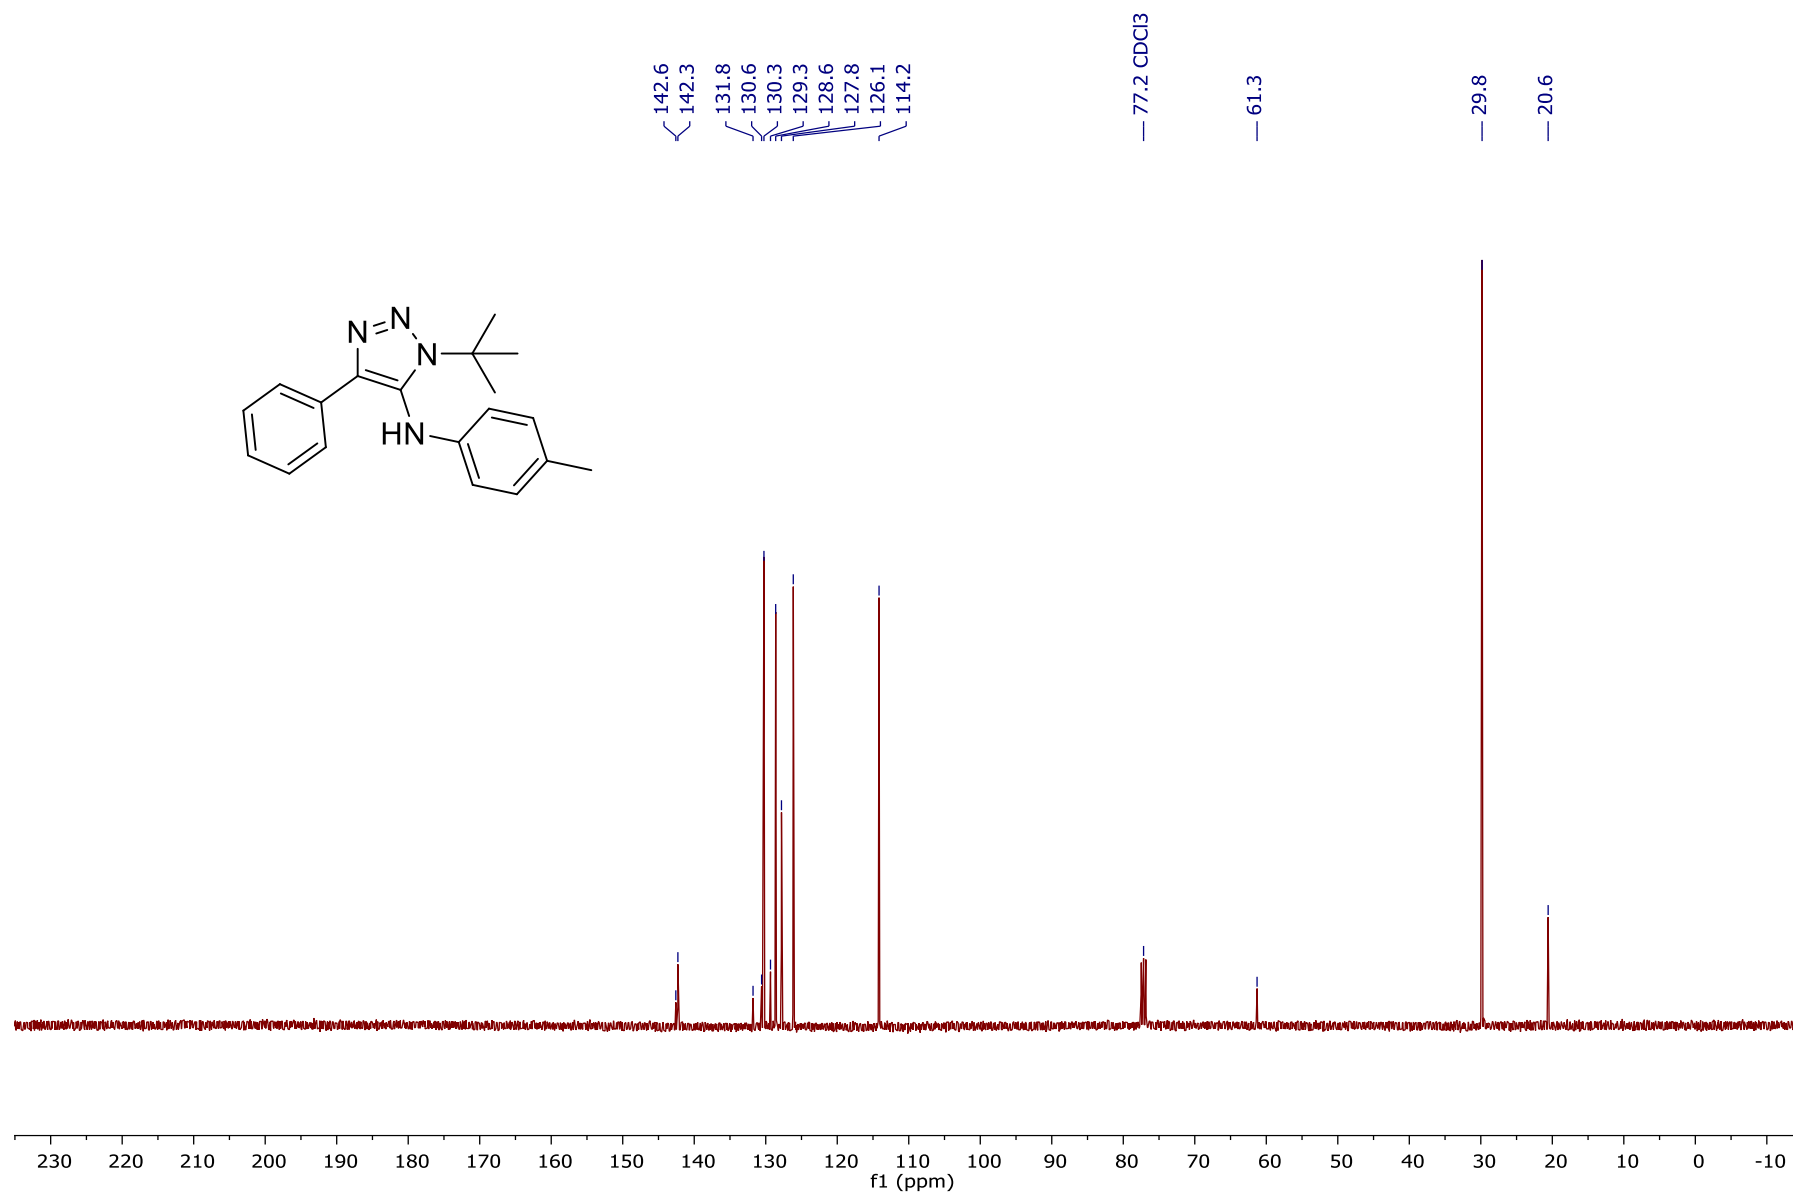

Figure S12.  $^{13}\text{C}\{^1\text{H}\}$  NMR (101 MHz, Chloroform-*d*) of **2e**

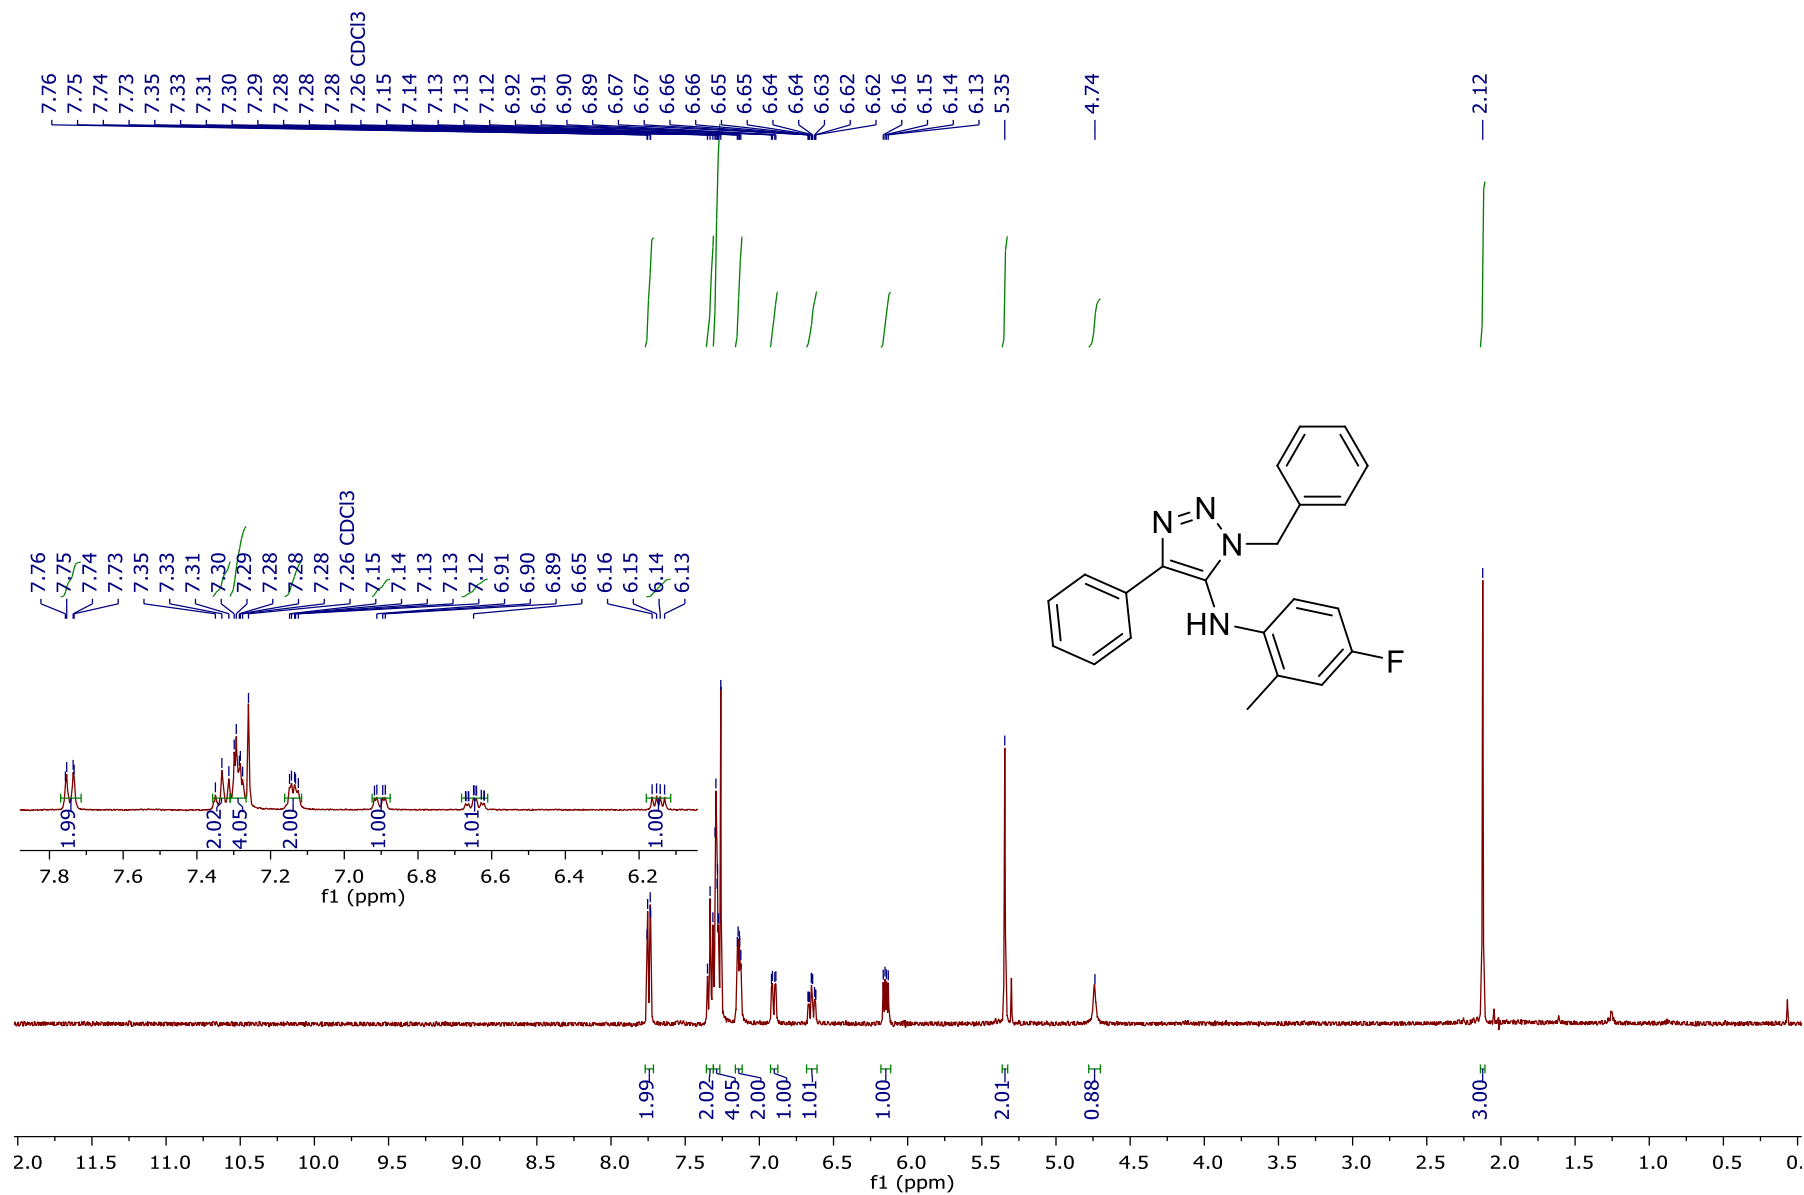

Figure S13. <sup>1</sup>H NMR (400 MHz, Chloroform-*d*) of 2f

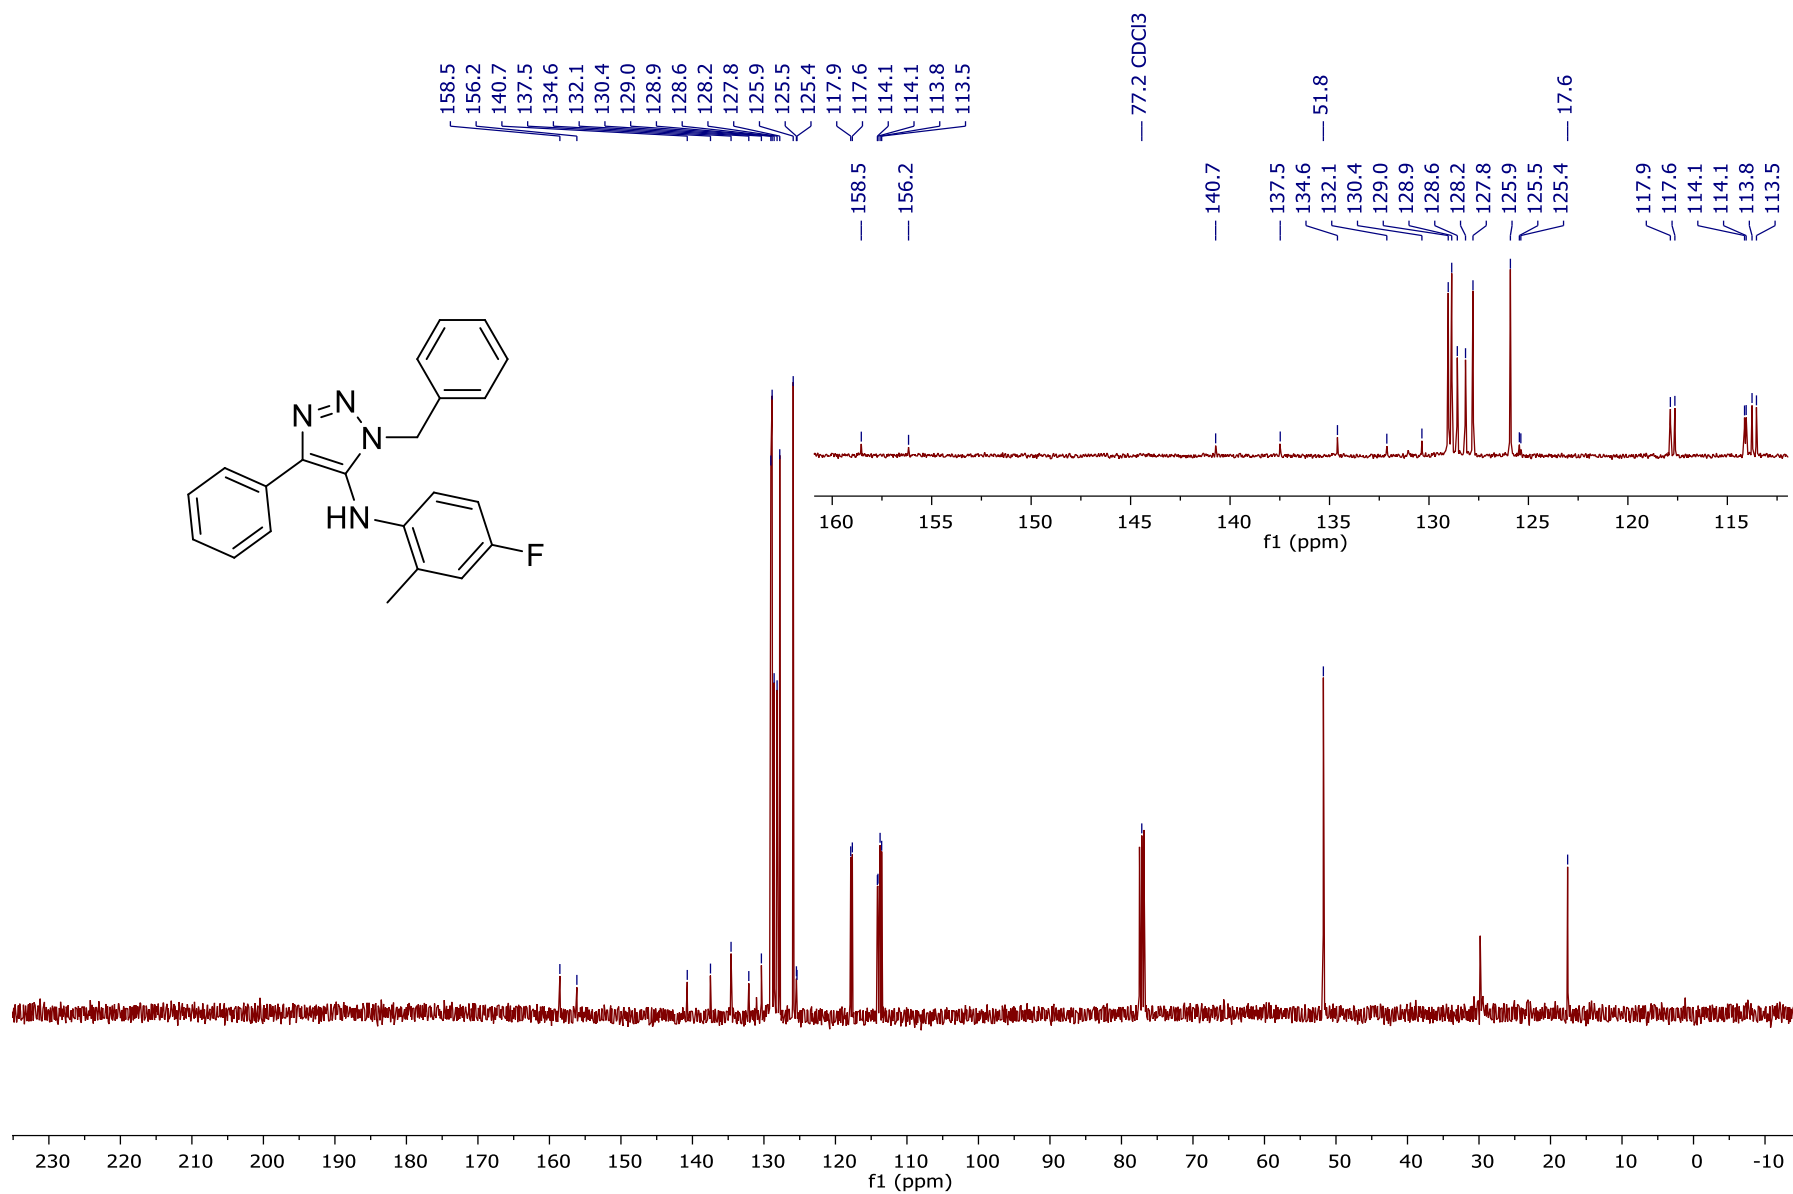

Figure S14.  $^{13}\text{C}\{^1\text{H}\}$  NMR (101 MHz,  $\text{Chloroform-}d$ ) of 2f

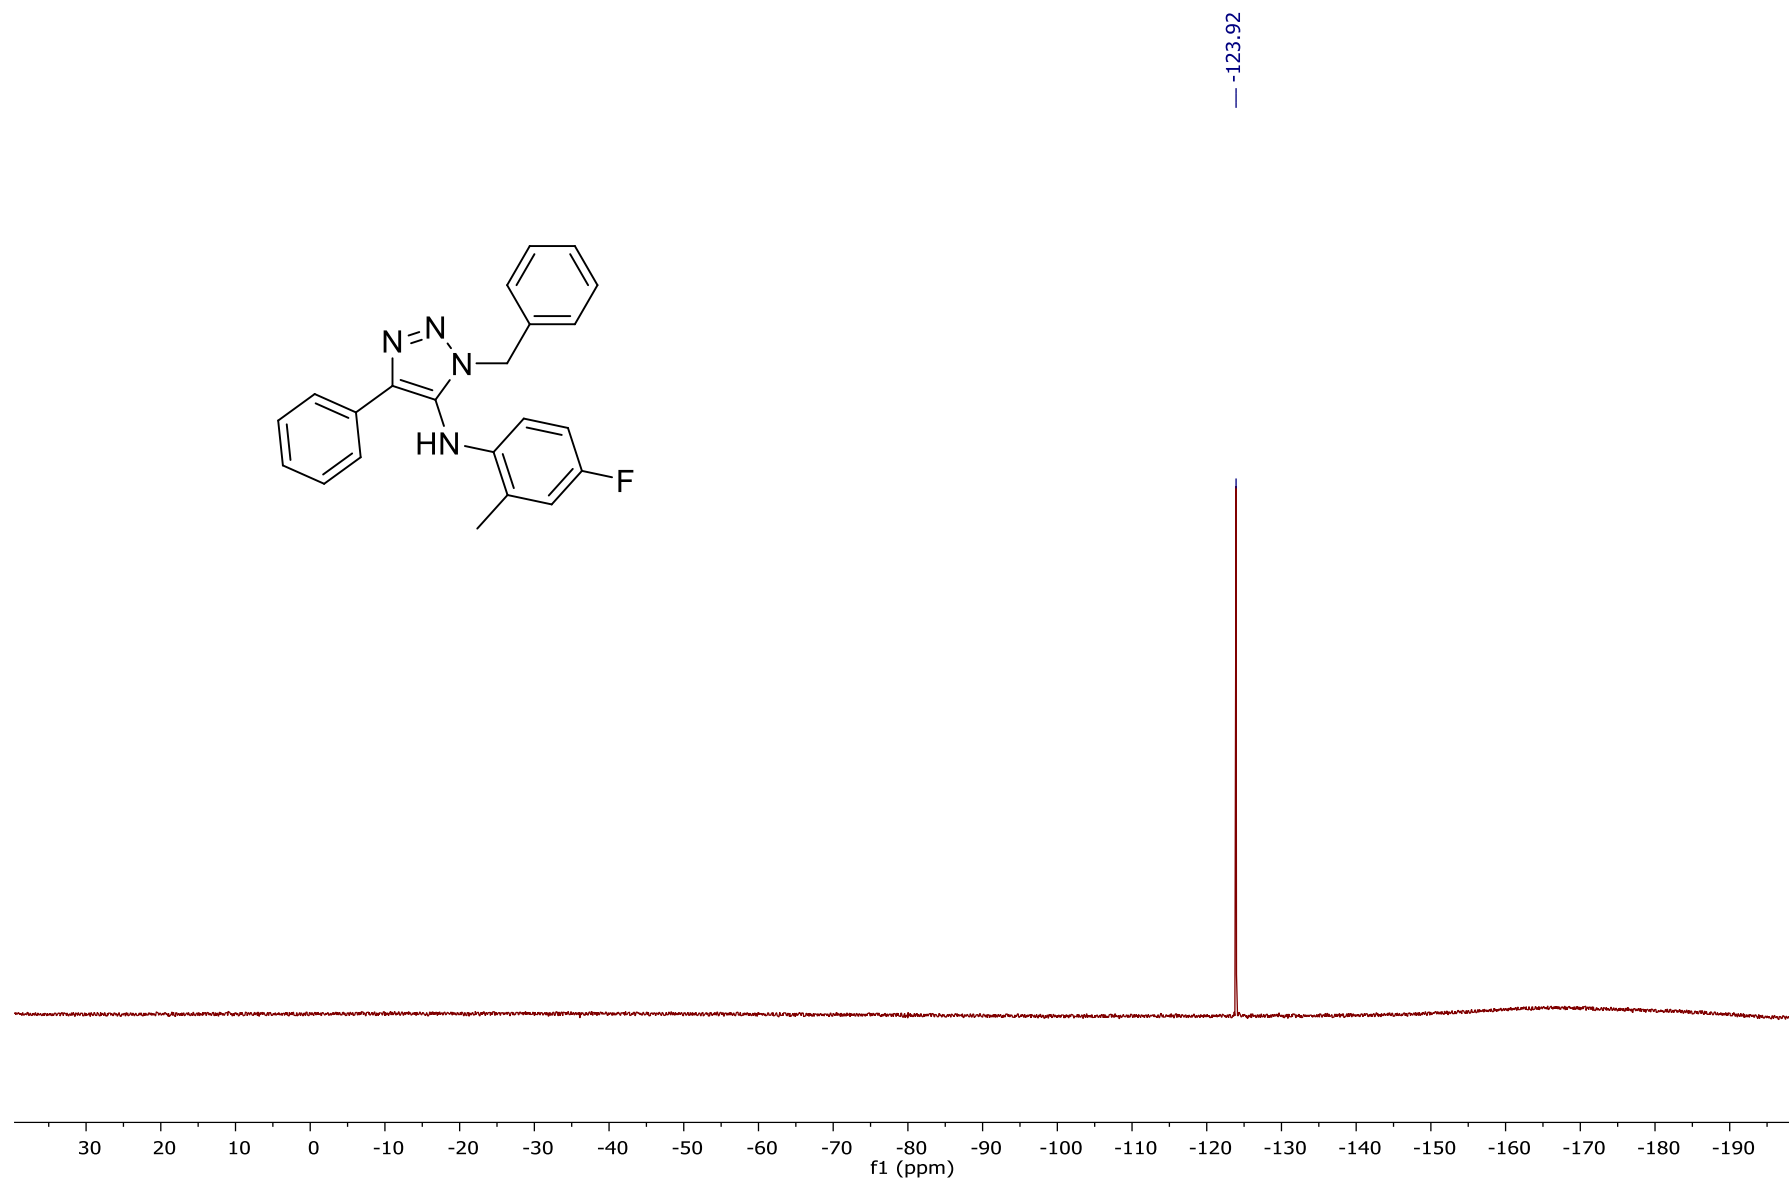

Figure S15.  $^{19}\text{F}$  NMR (376 MHz, Chloroform-*d*) of **2f**



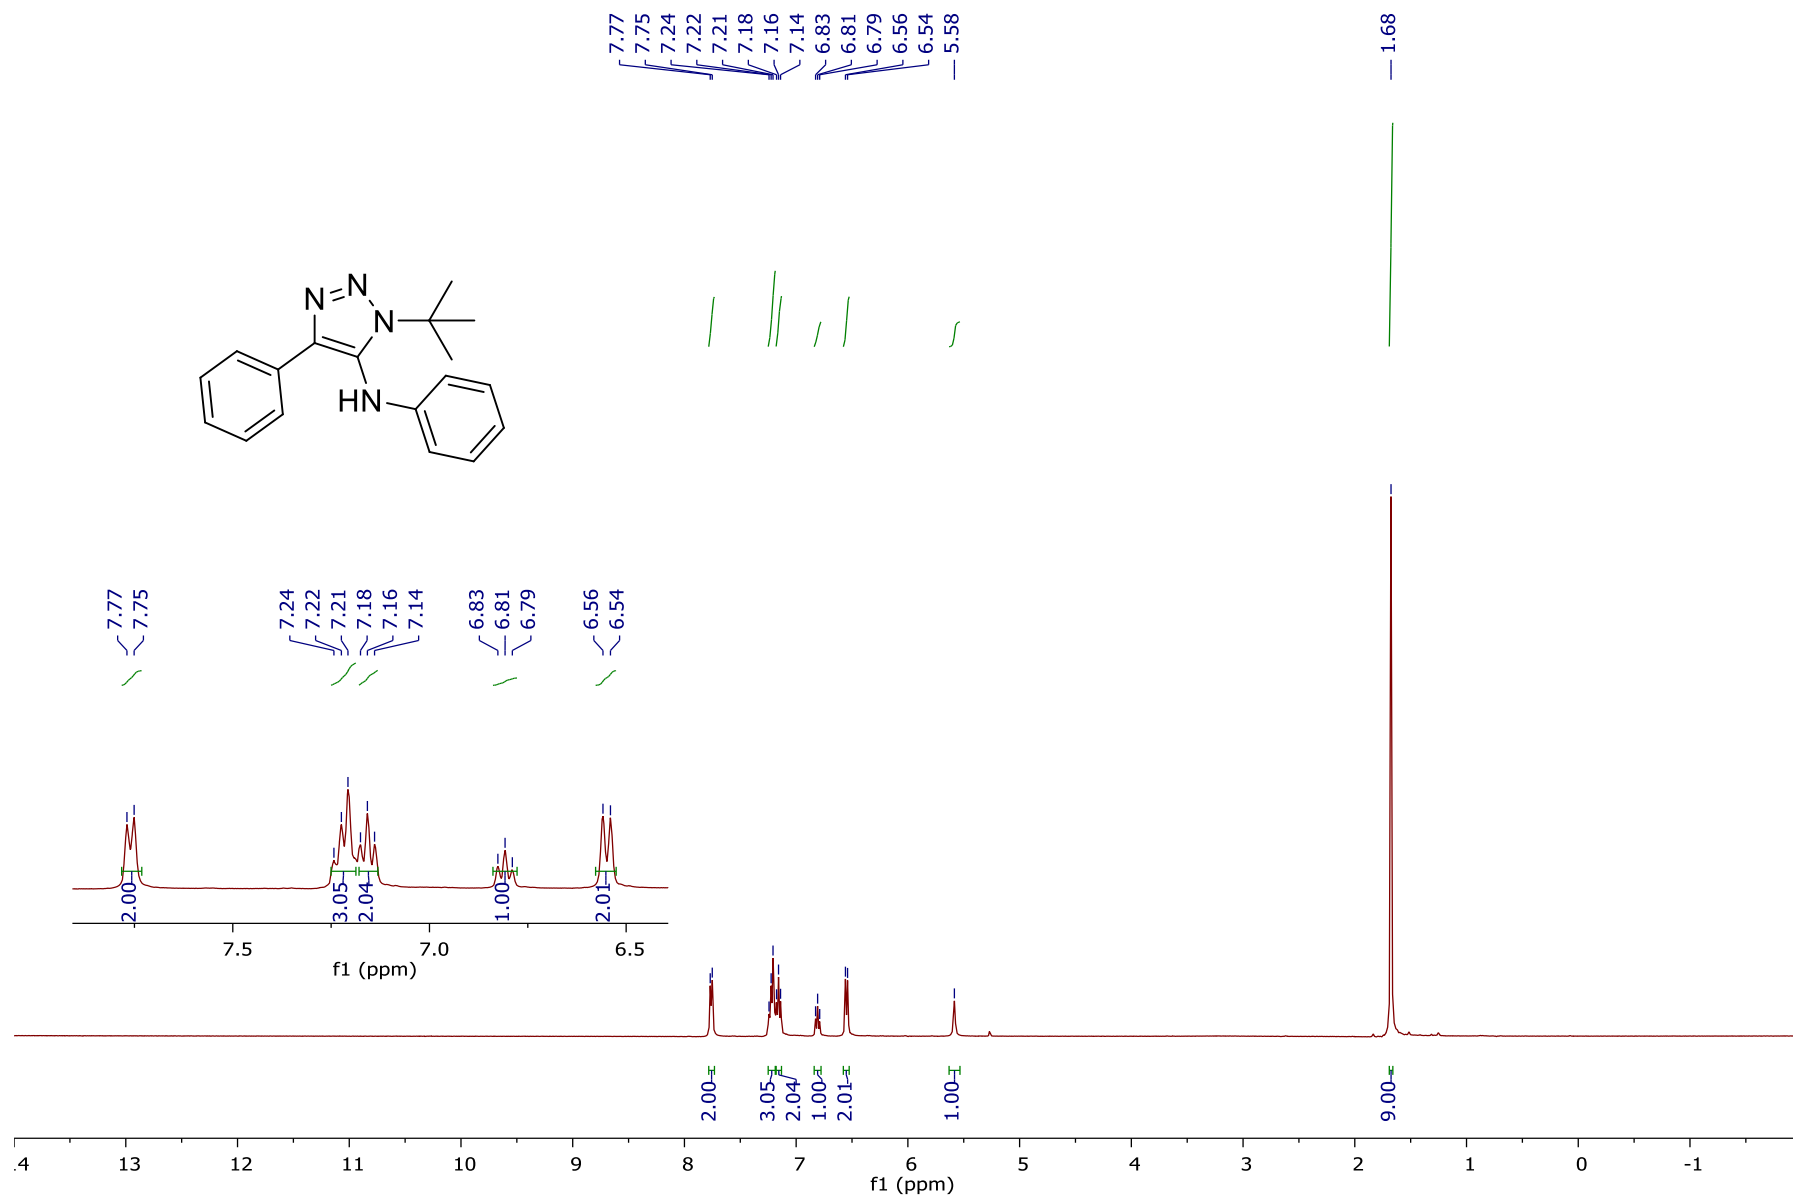

Figure S16.  $^1\text{H}$  NMR (400 MHz, Chloroform- $d$ ) of 2g

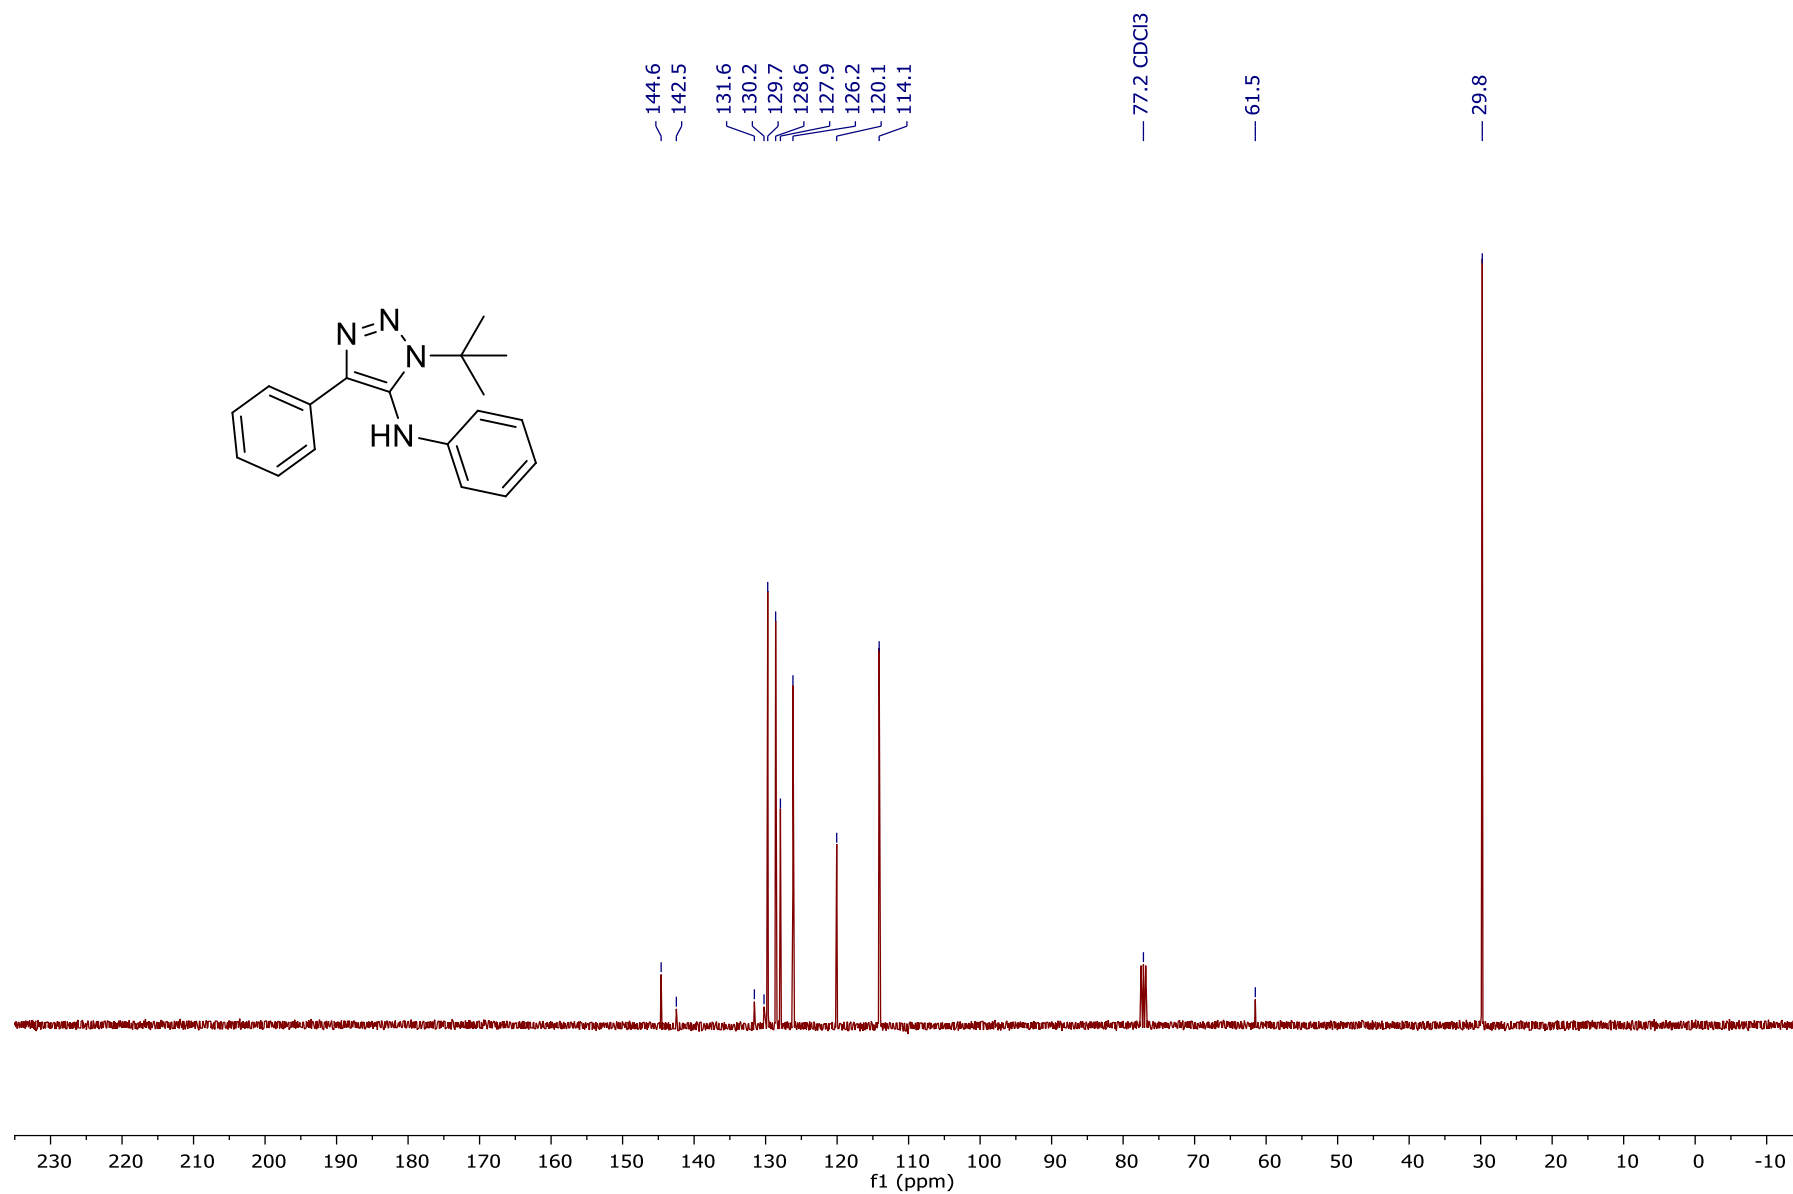

Figure S17.  $^{13}\text{C}\{^1\text{H}\}$  NMR (101 MHz,  $\text{CDCl}_3$ ) of 2g

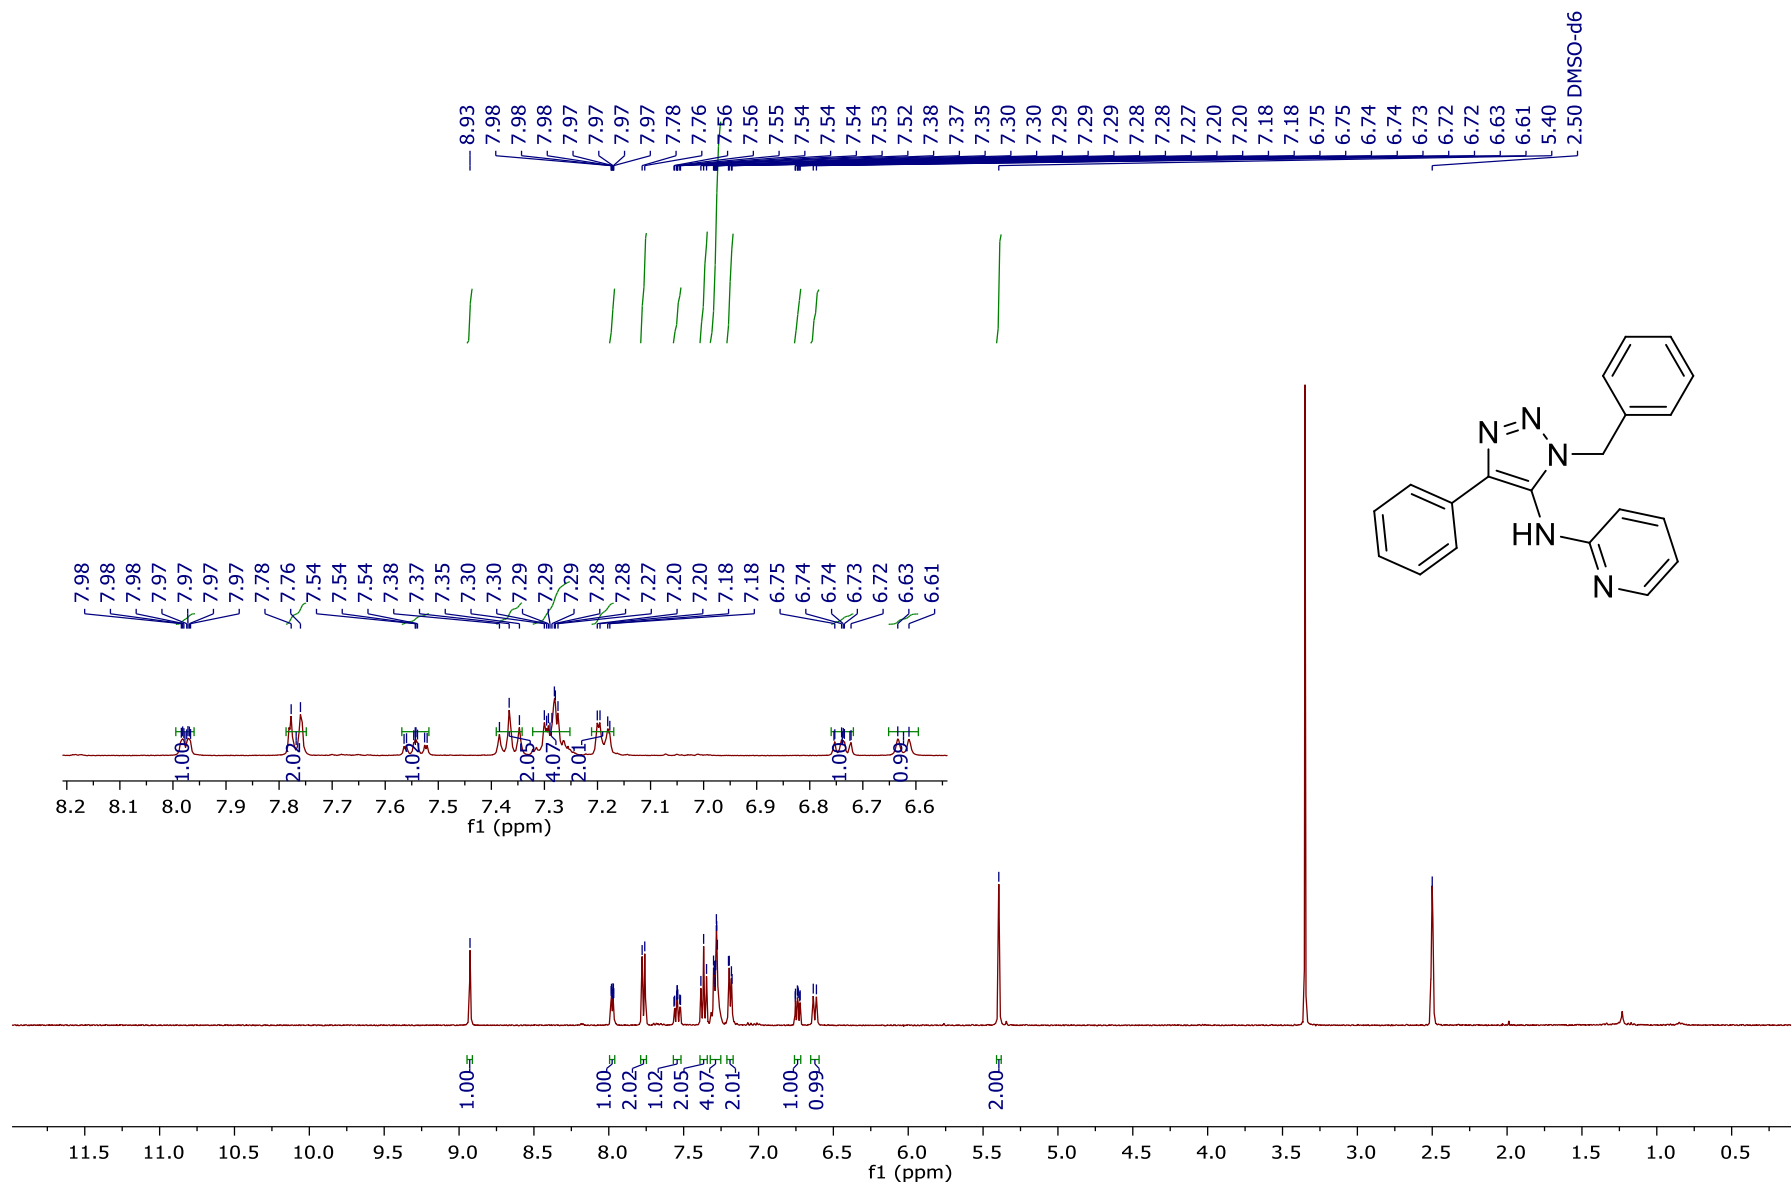

Figure S18. <sup>1</sup>H NMR (400 MHz, DMSO-*d*<sub>6</sub>) of 2h

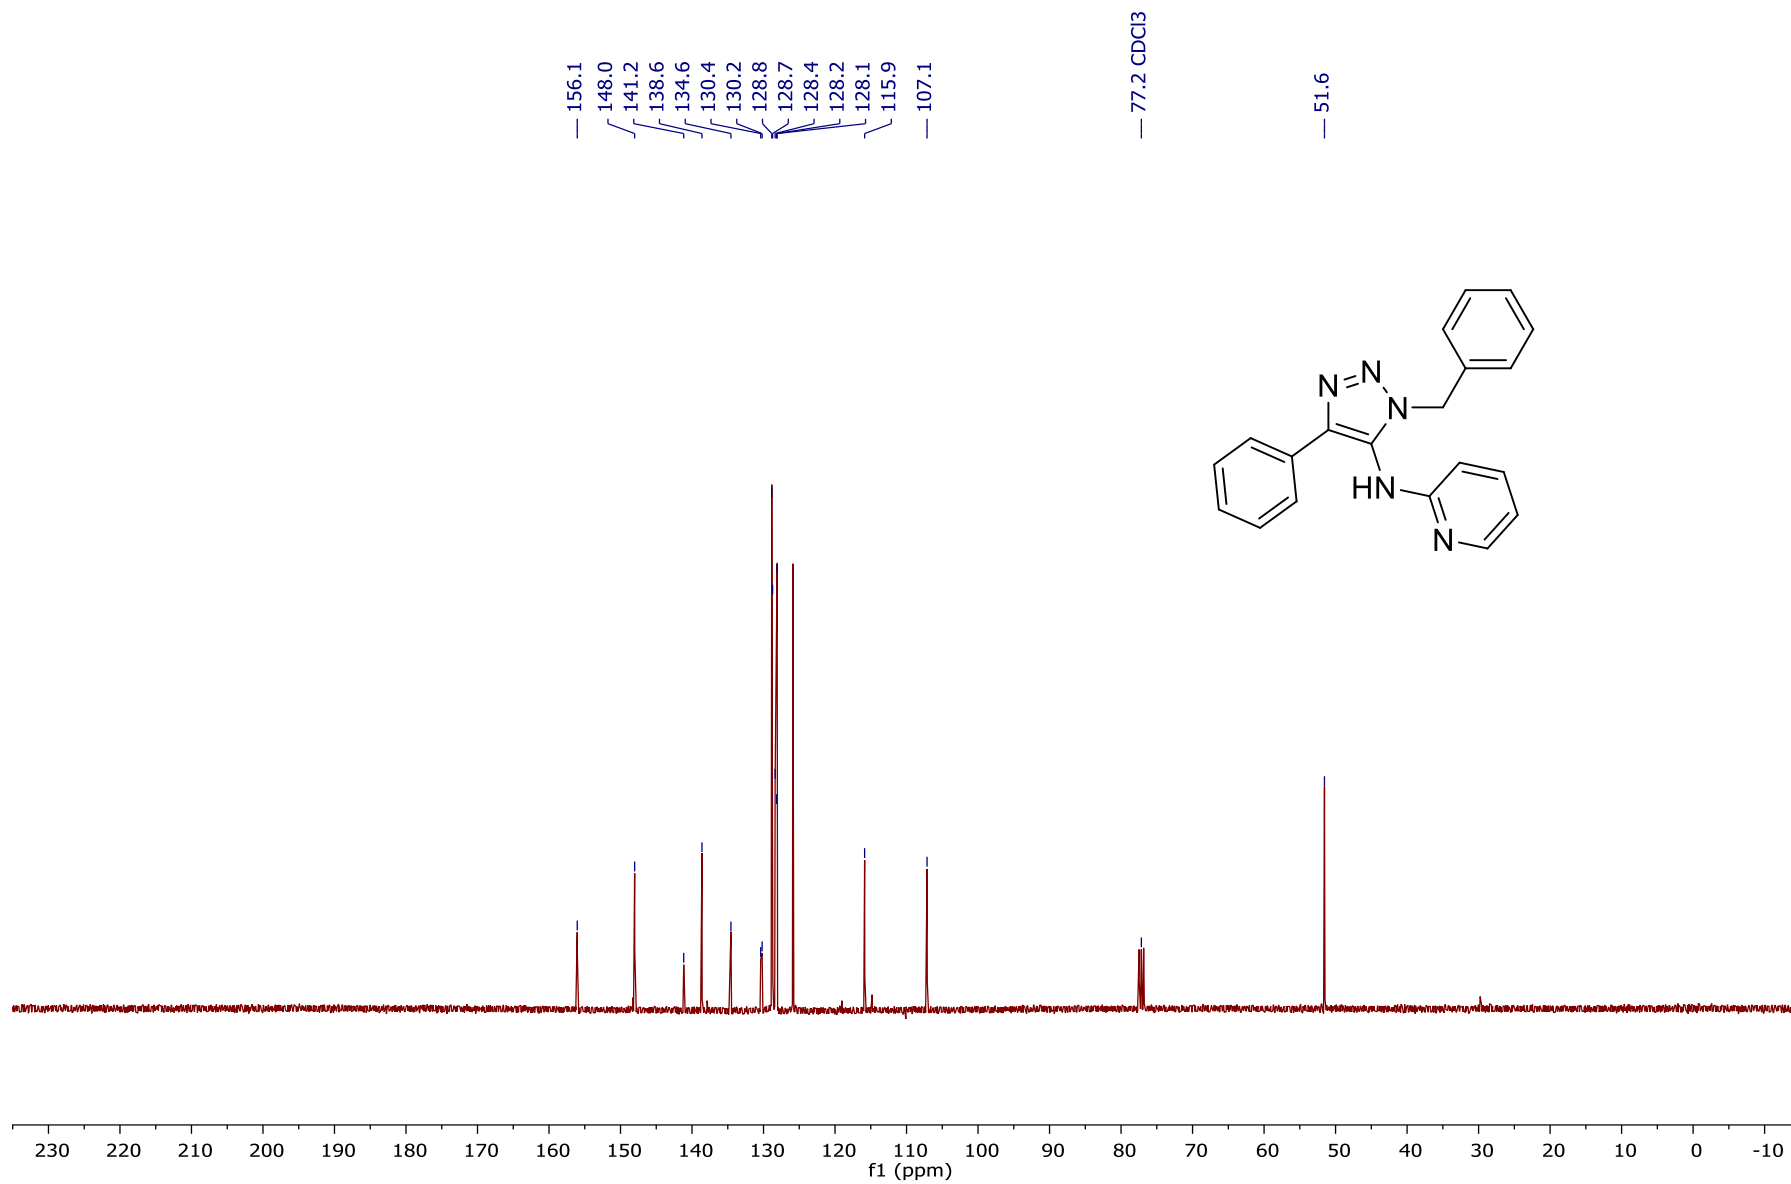

Figure S19.  $^{13}\text{C}\{^1\text{H}\}$  NMR (101 MHz, Chloroform-*d*) of 2h

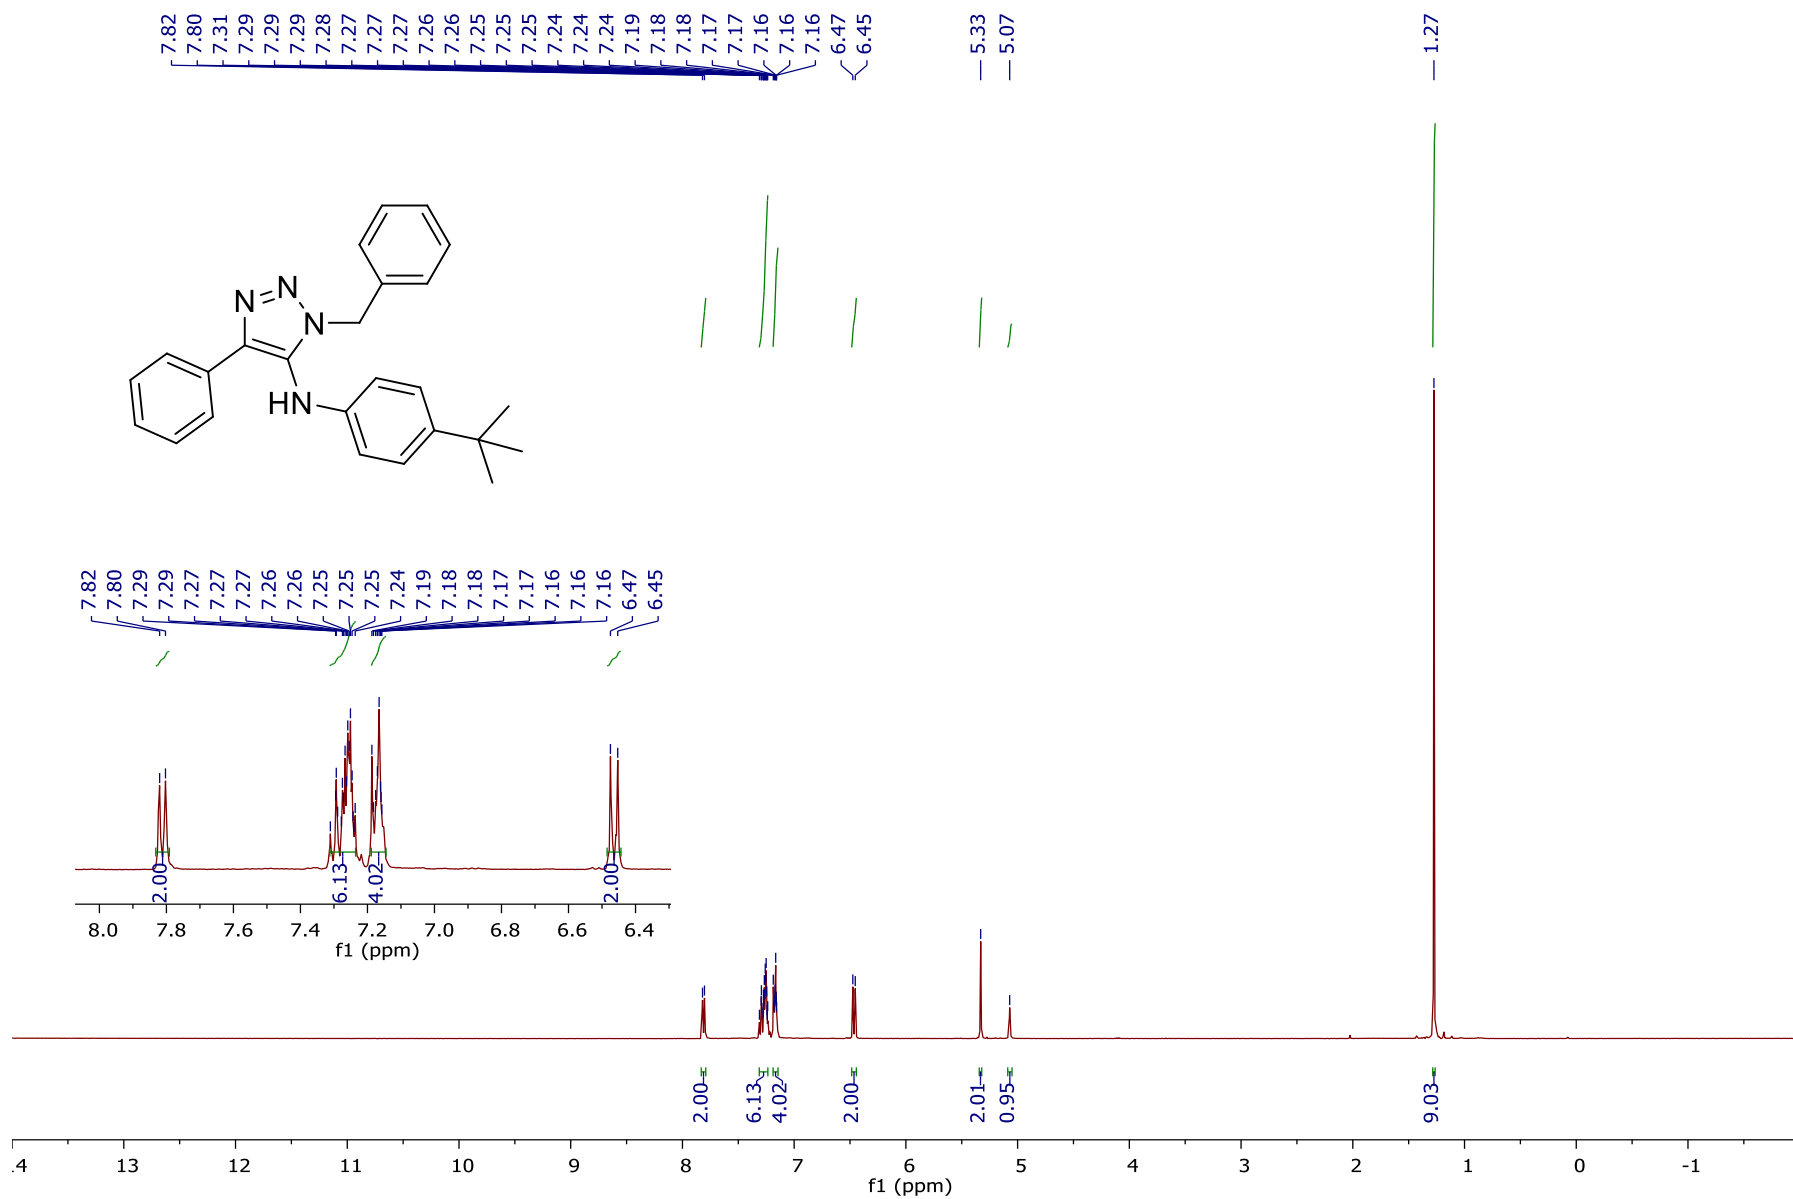

Figure S20. <sup>1</sup>H NMR (400 MHz, Chloroform-*d*) of 2i

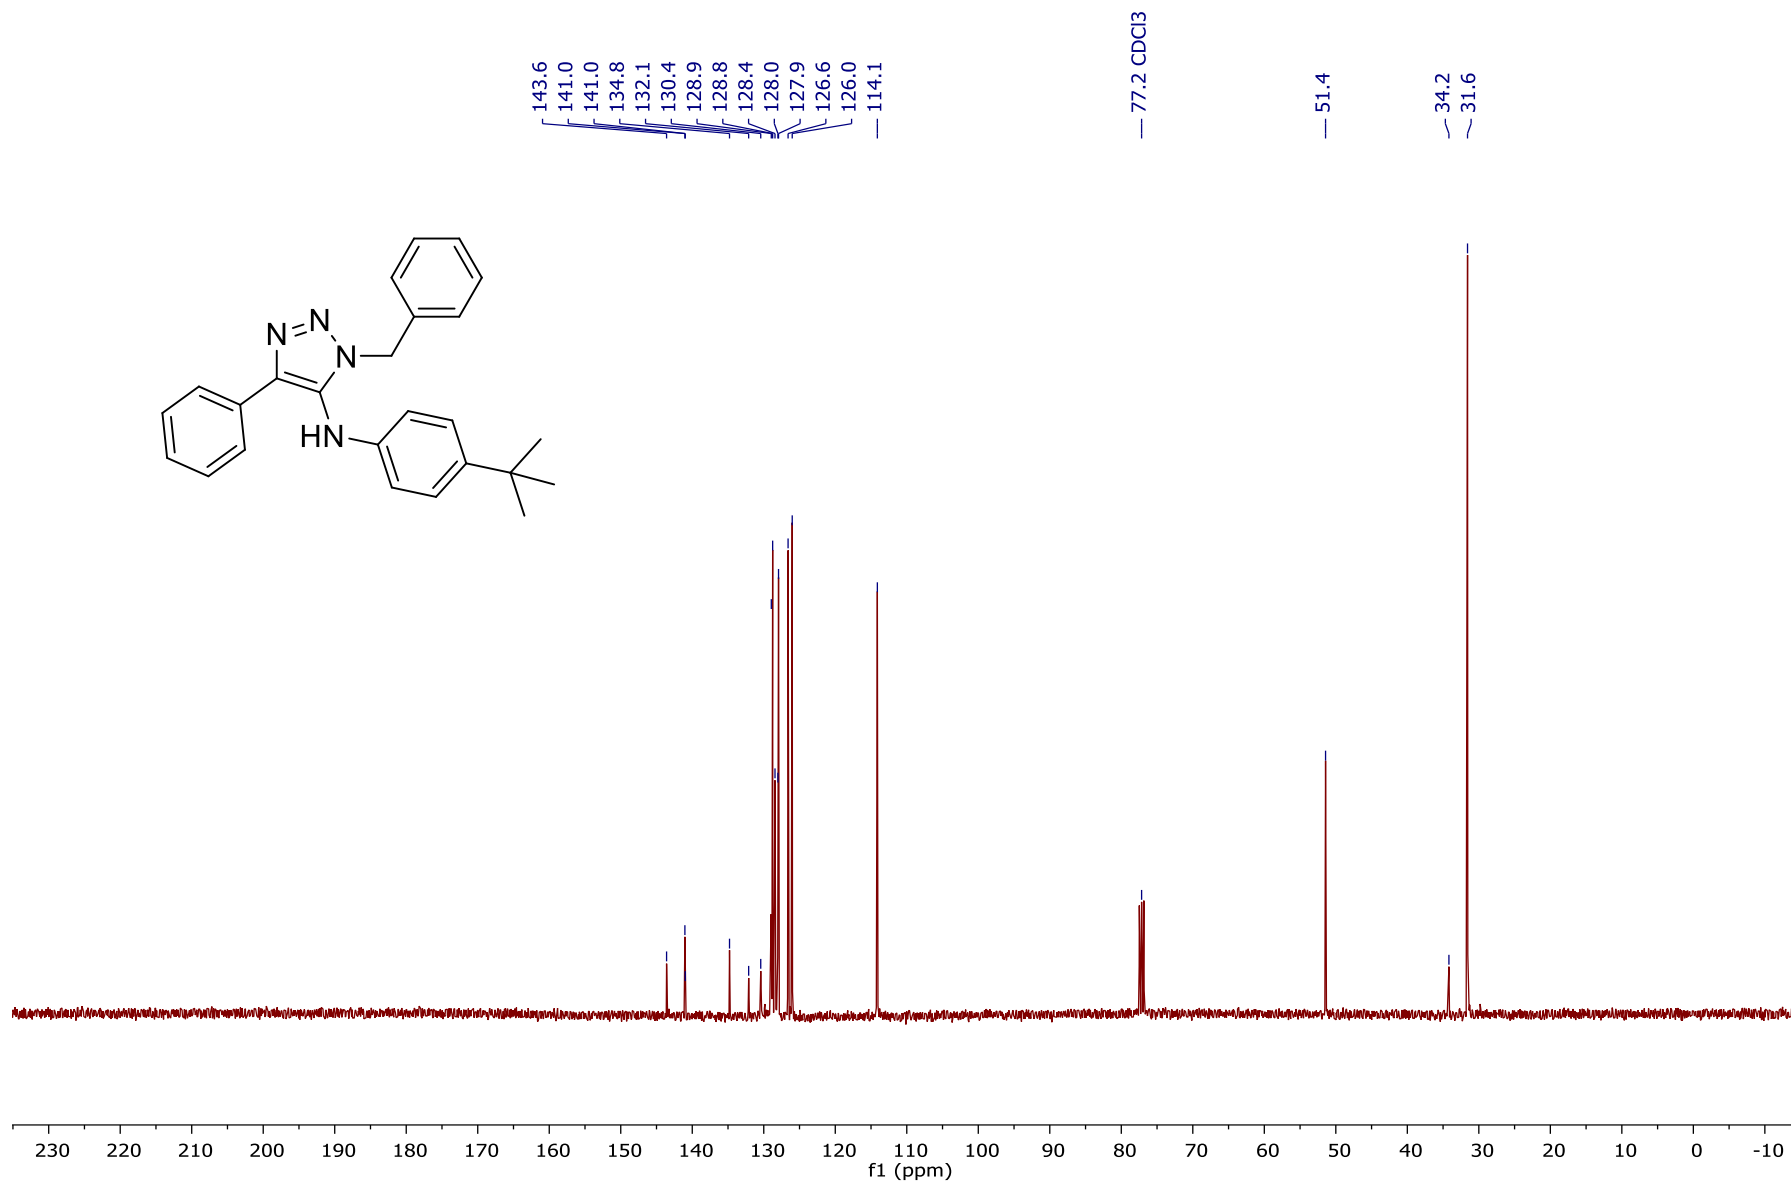

Figure S21.  $^{13}\text{C}\{^1\text{H}\}$  NMR (101 MHz, Chloroform-*d*) of 2i

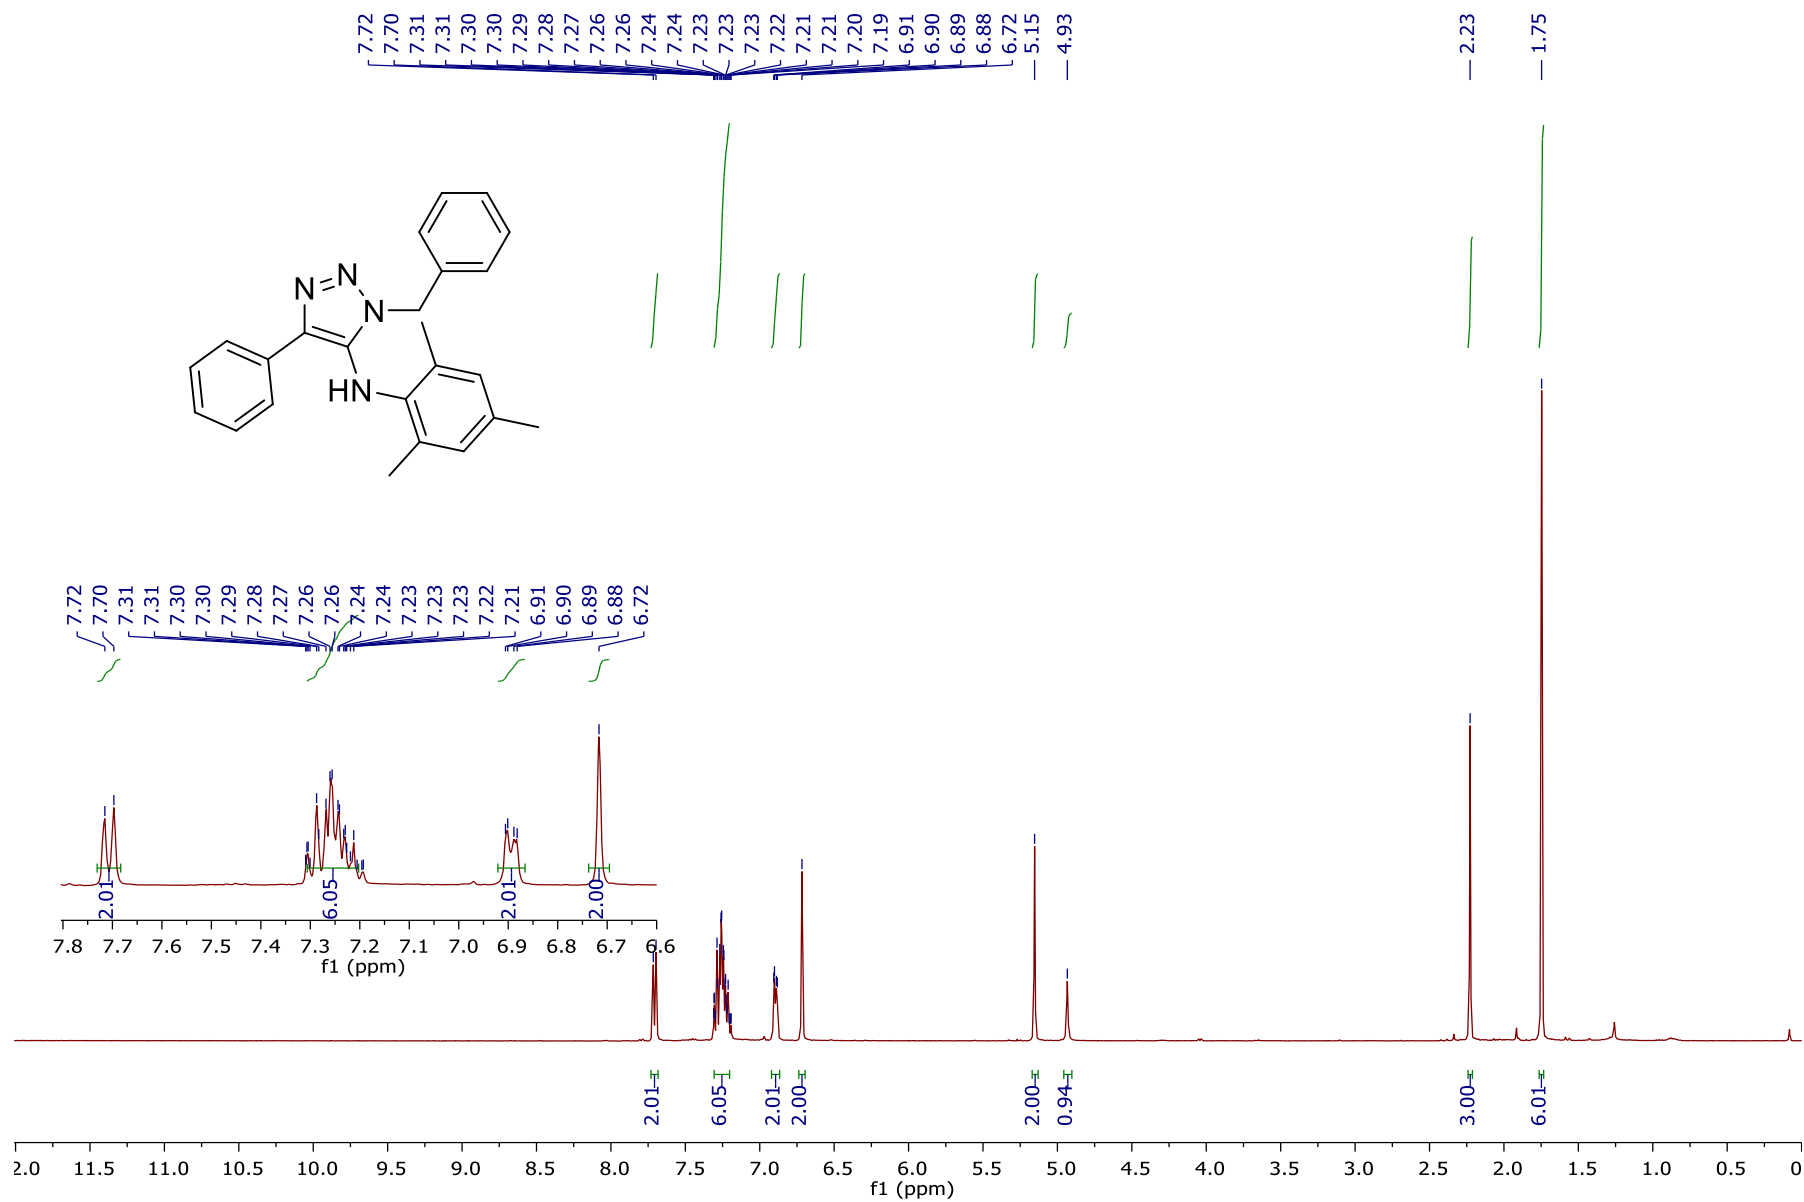

Figure S22. <sup>1</sup>H NMR (400 MHz, Chloroform-*d*) of 2j

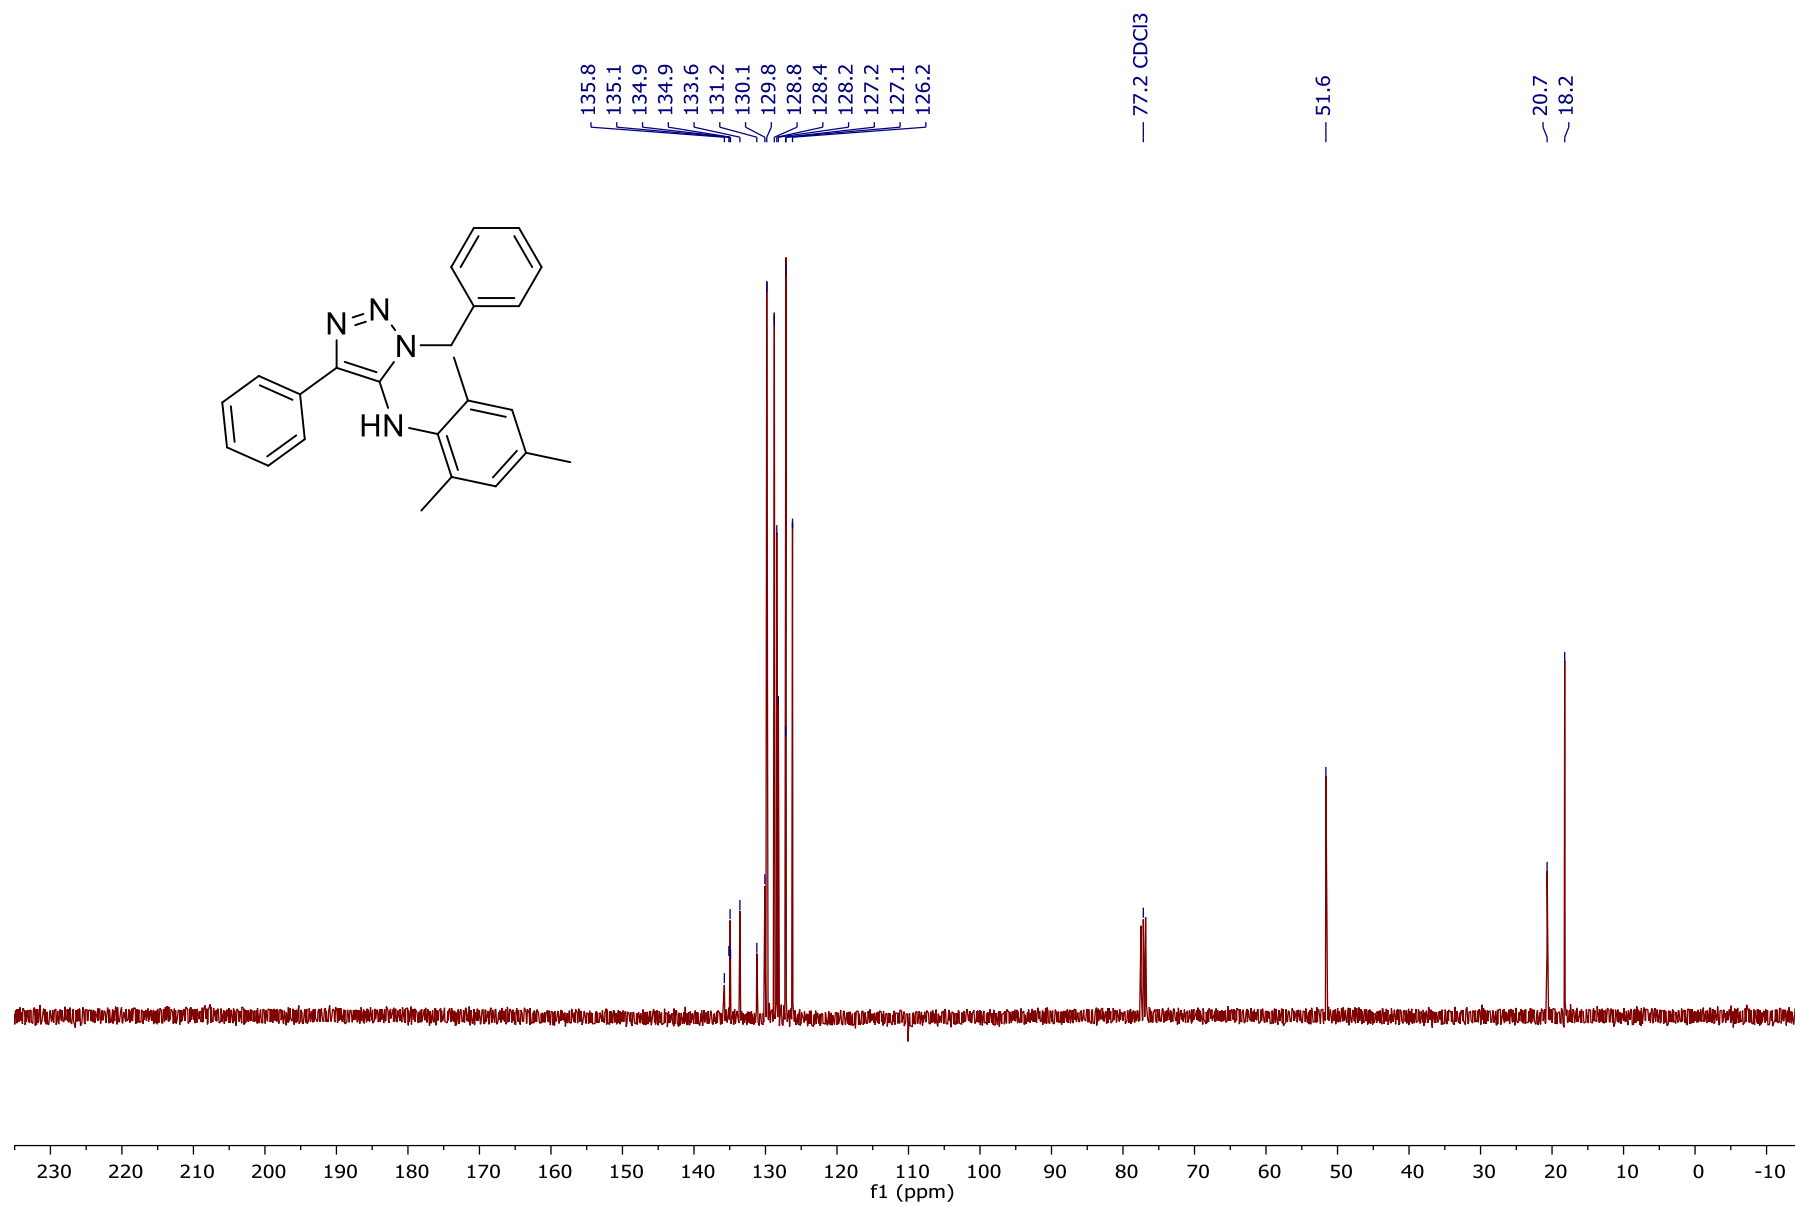

Figure S23.  $^{13}\text{C}\{^1\text{H}\}$  NMR (101 MHz, Chloroform-*d*) of 2j



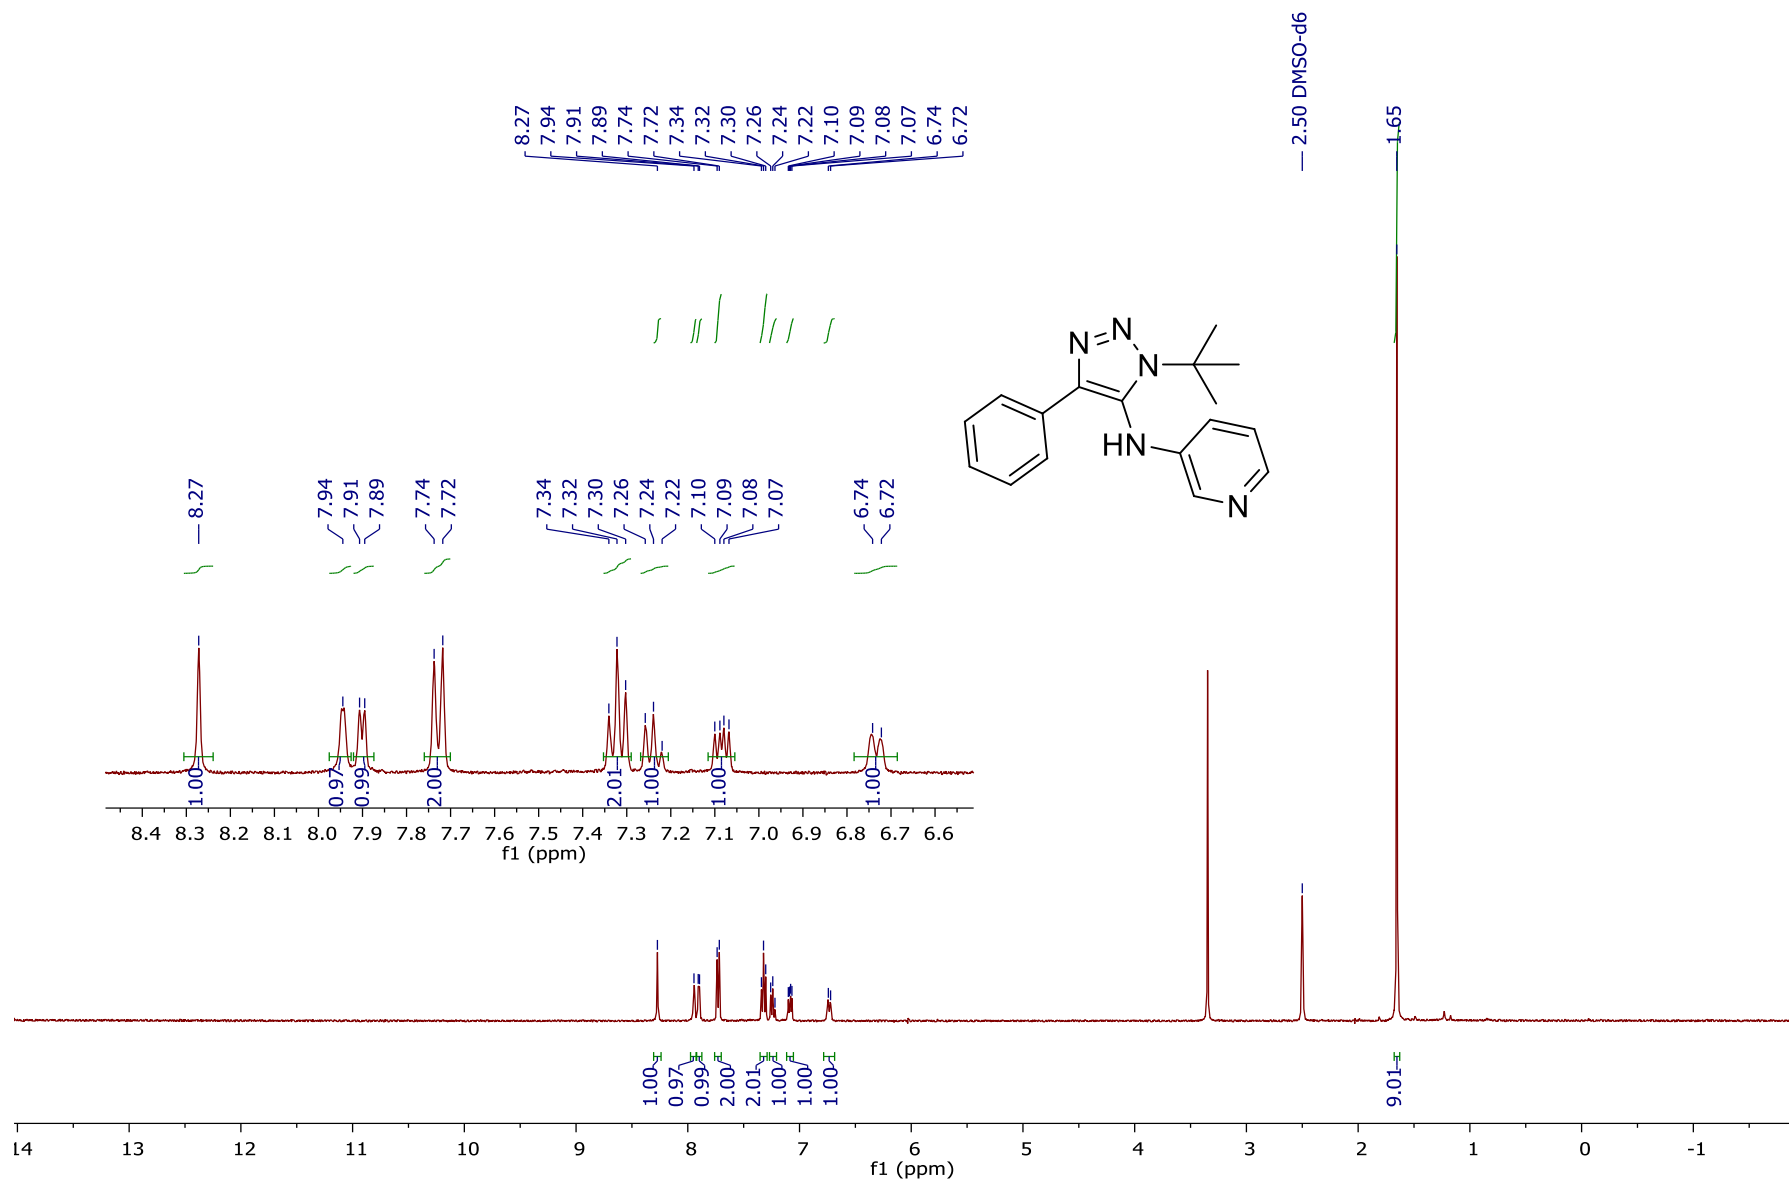

Figure S24. <sup>1</sup>H NMR (400 MHz, DMSO-*d*<sub>6</sub>) of 2k

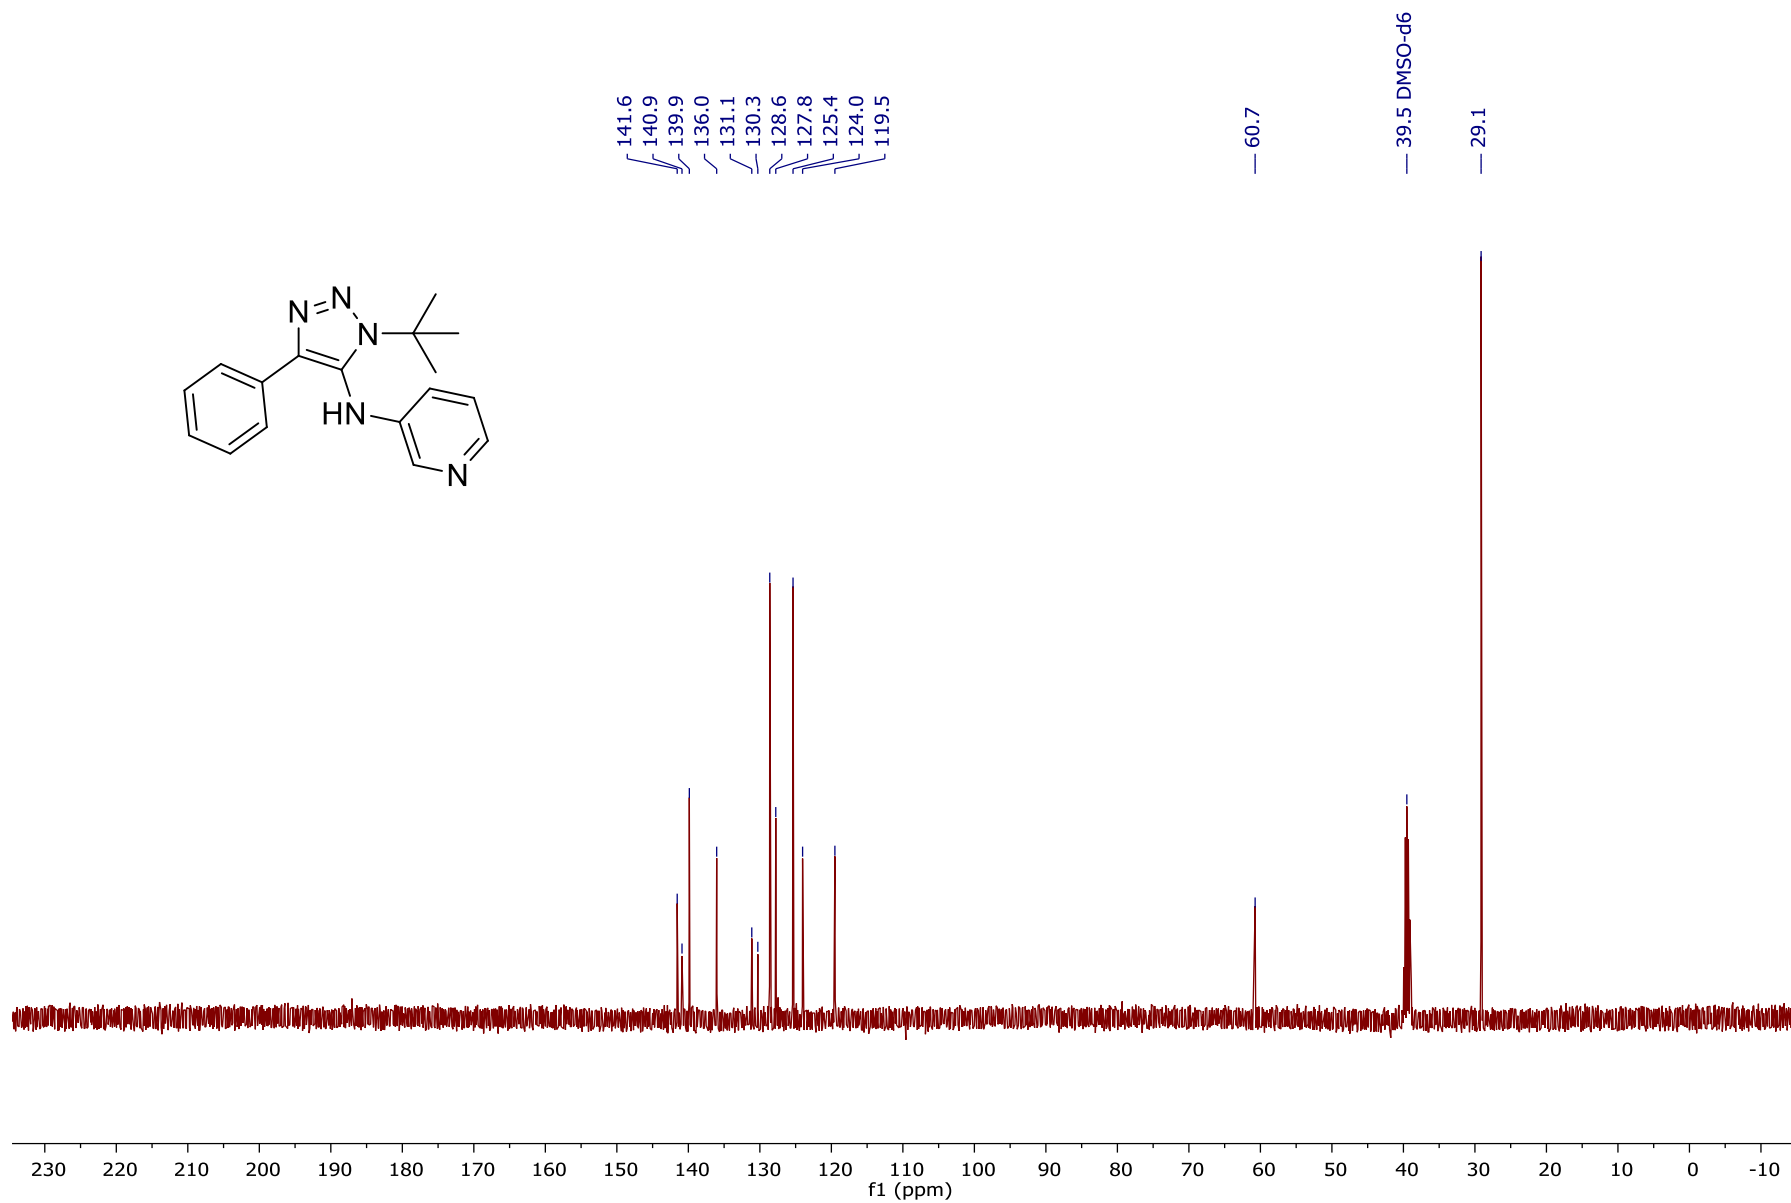

Figure S25.  $^{13}\text{C}\{^1\text{H}\}$  NMR (101 MHz, DMSO- $d_6$ ) of 2k

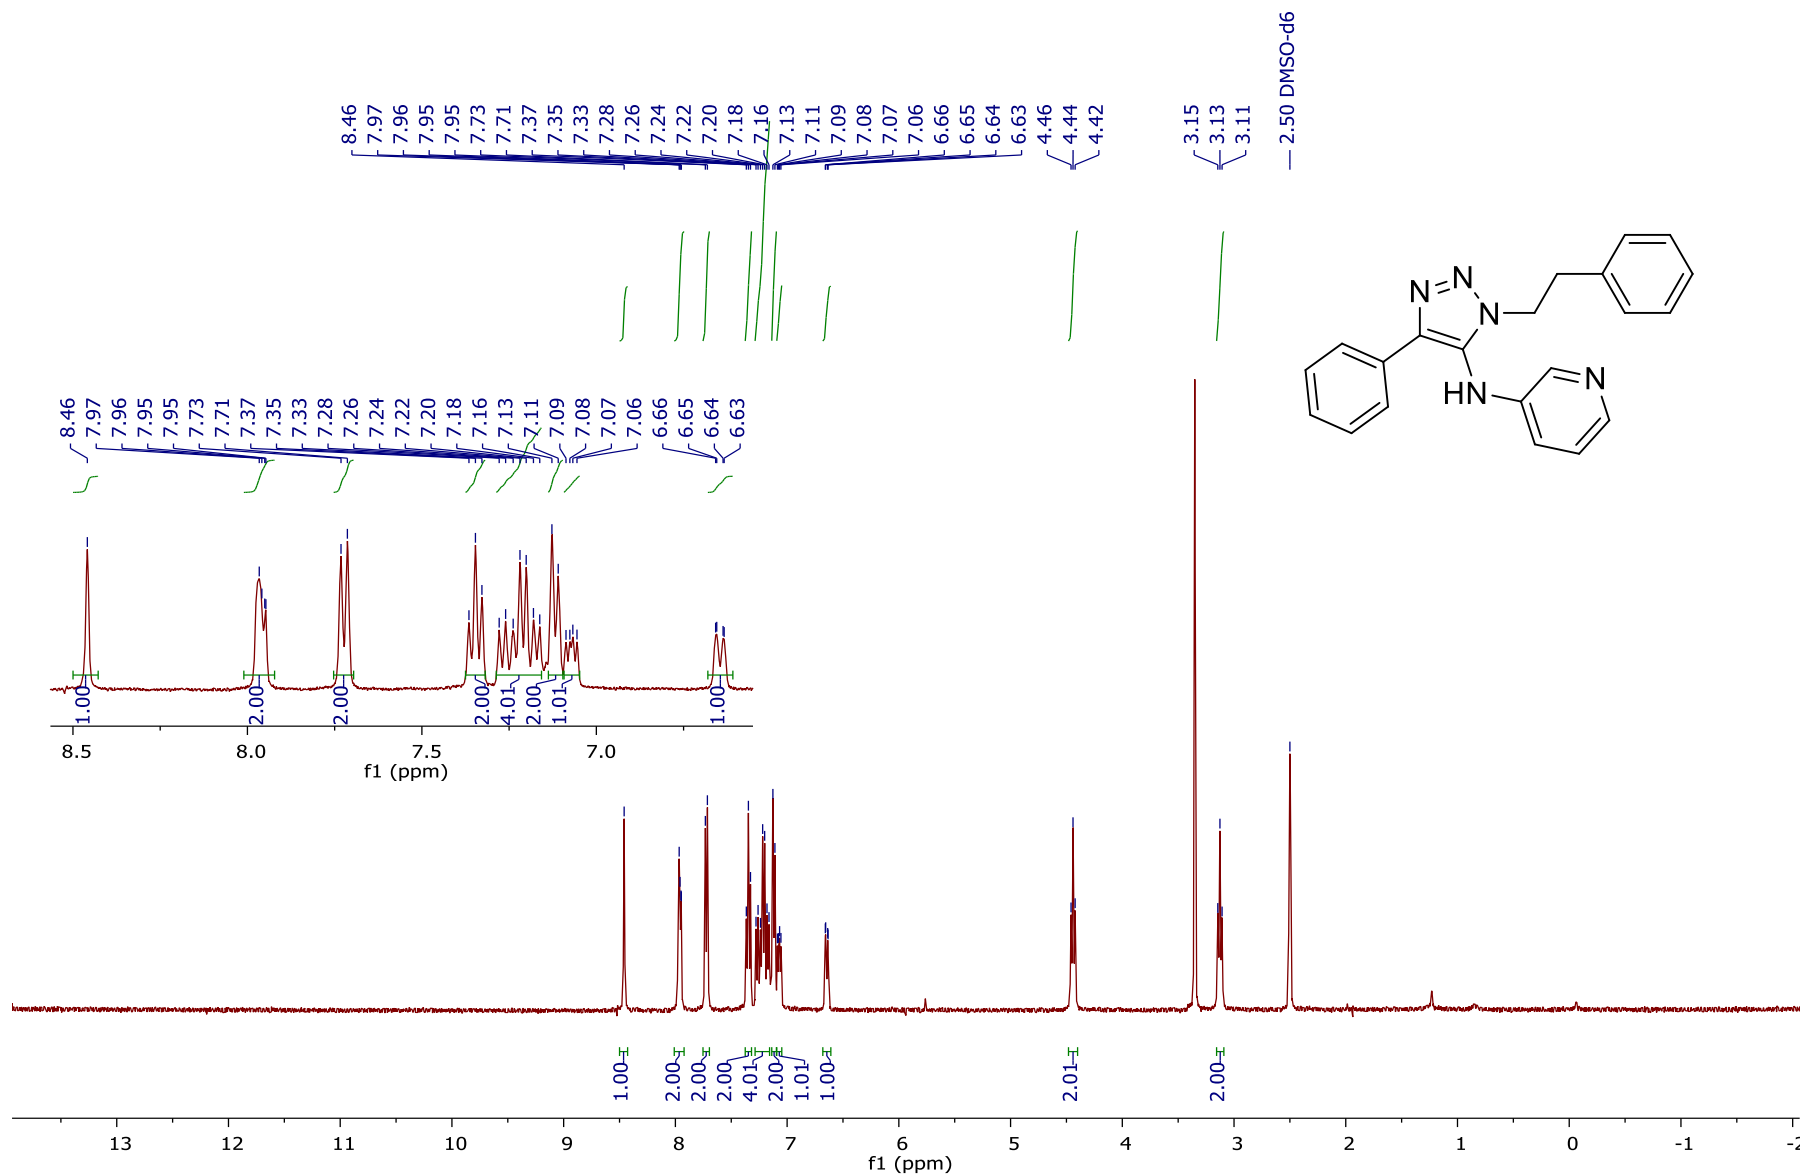

Figure S26. <sup>1</sup>H NMR (400 MHz, DMSO-d<sub>6</sub>) of 21

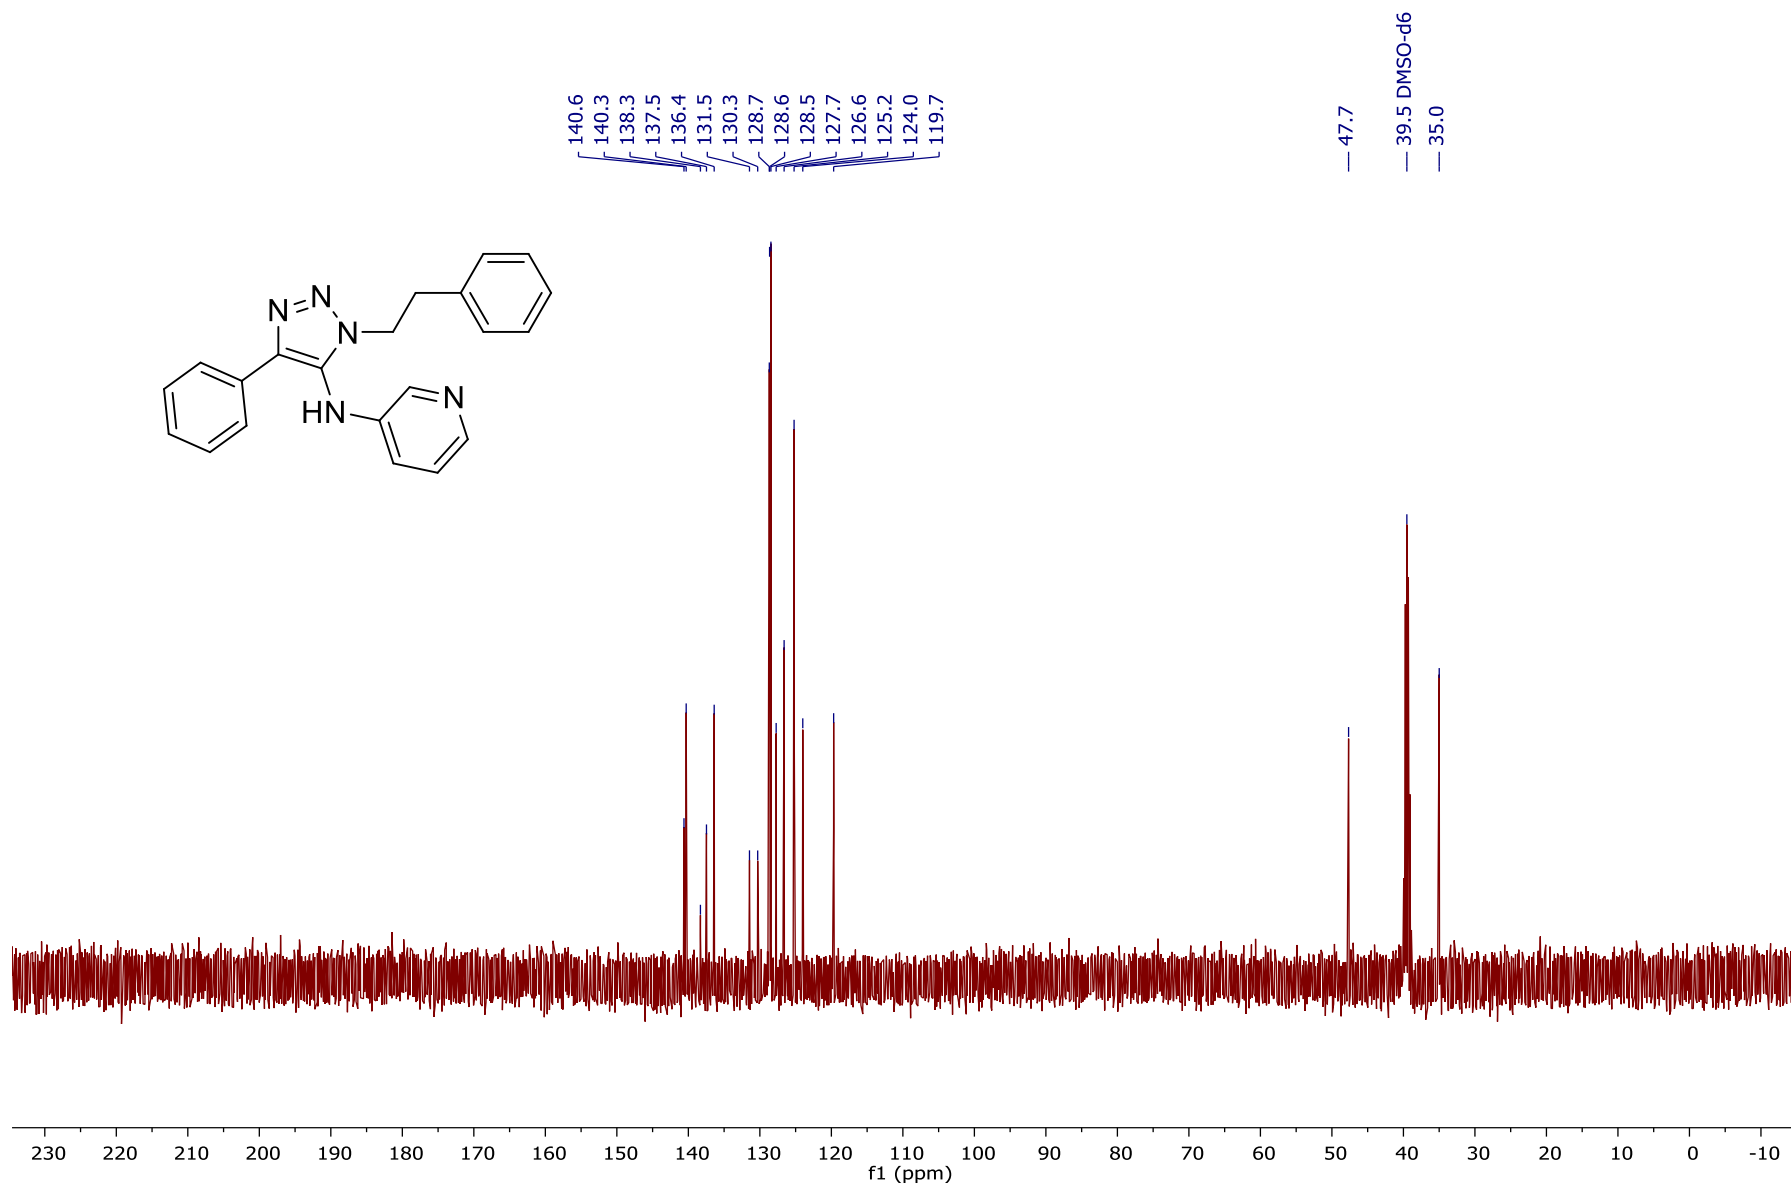

Figure S27.  $^{13}\text{C}\{^1\text{H}\}$  NMR (101 MHz, DMSO- $d_6$ ) of 2l

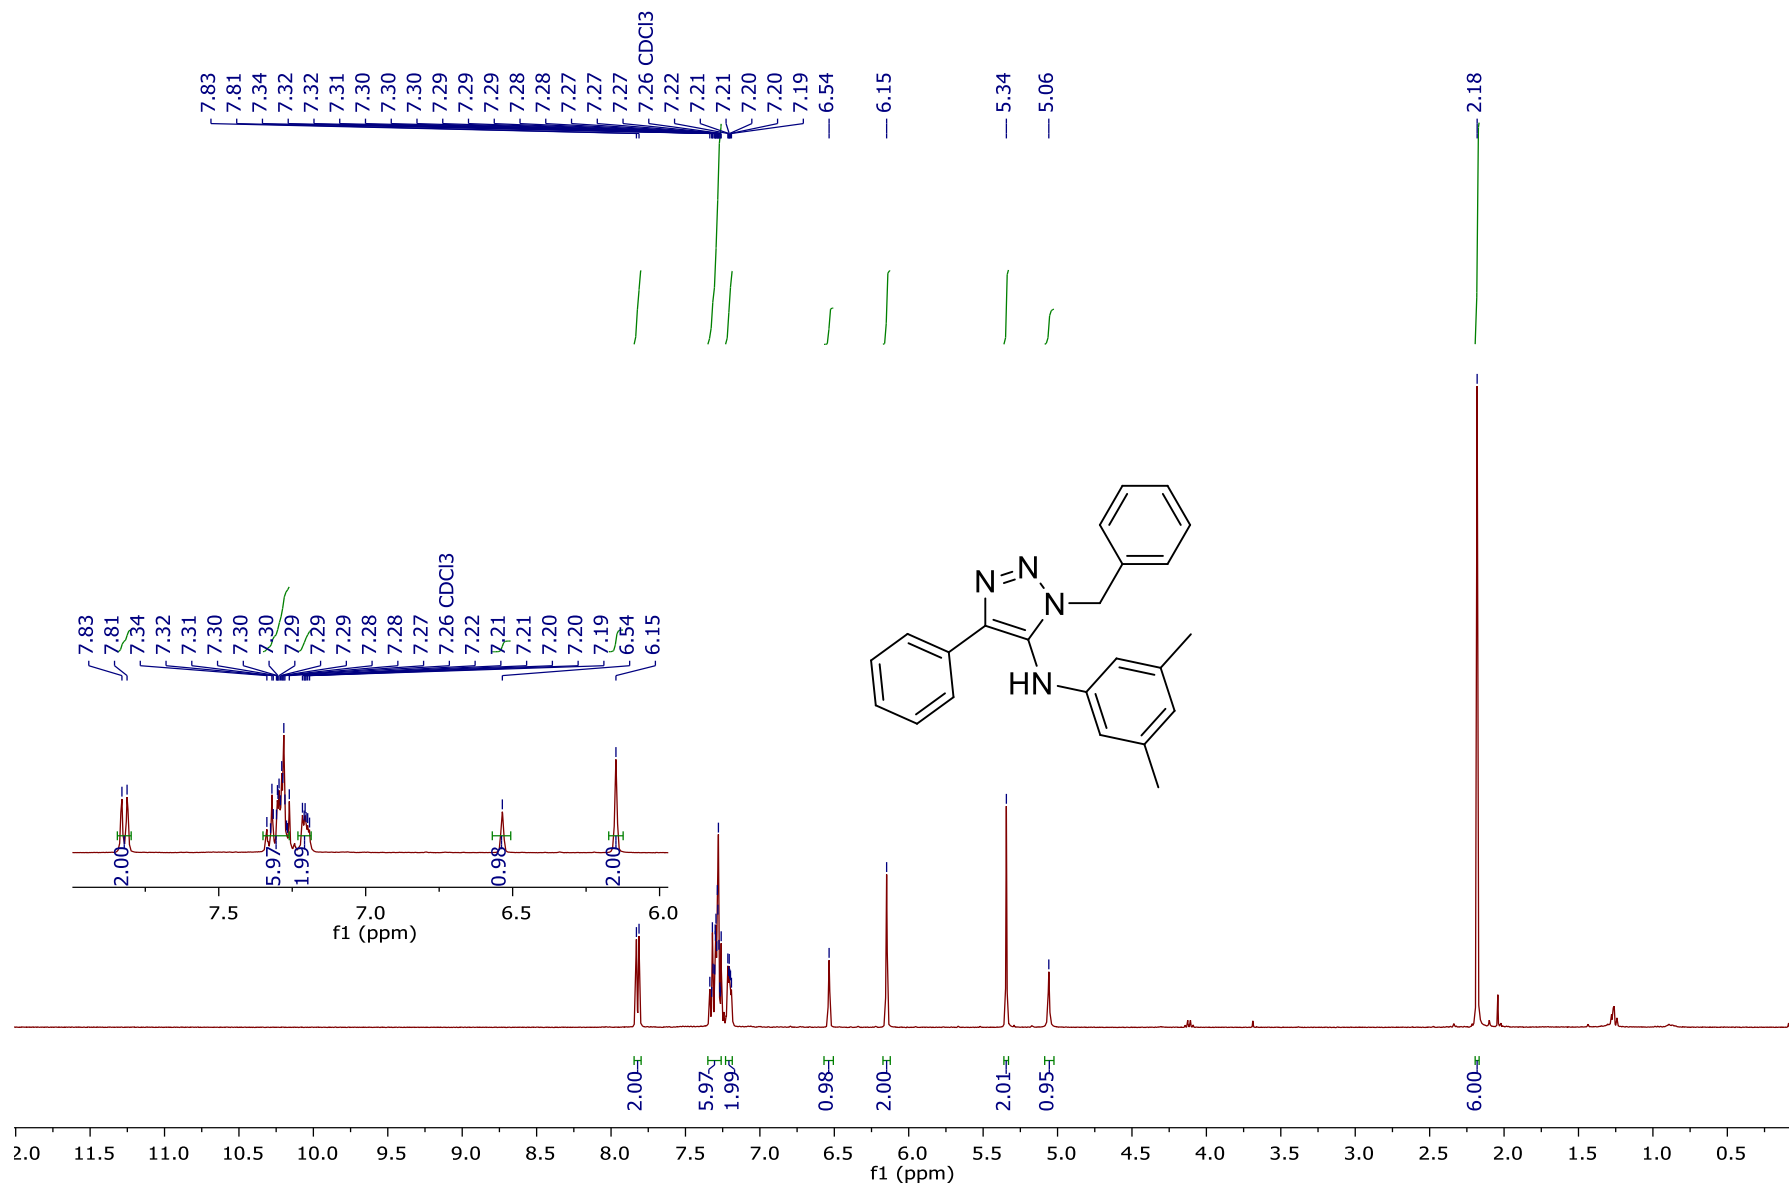

Figure S28. <sup>1</sup>H NMR (400 MHz, Chloroform-*d*) of 2m

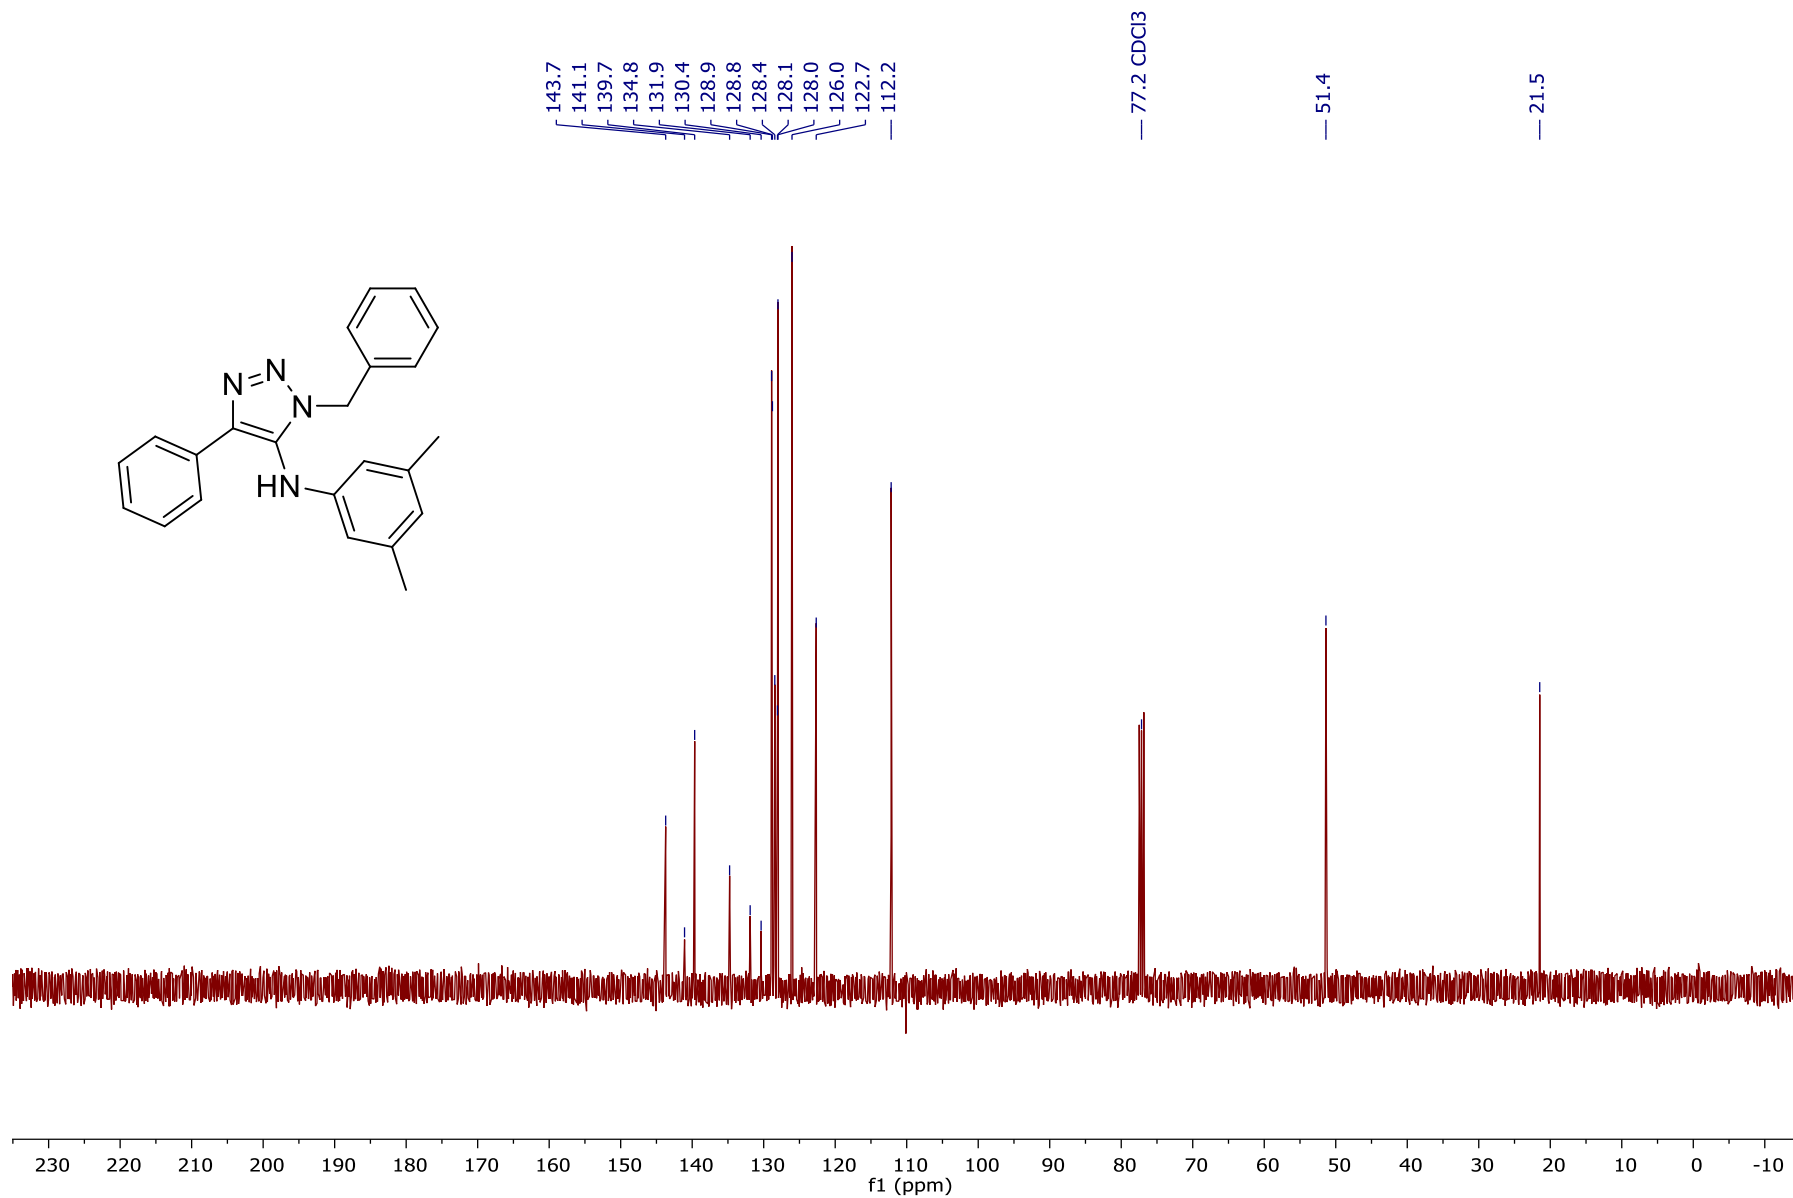

Figure S29.  $^{13}\text{C}\{^1\text{H}\}$  NMR (101 MHz, Chloroform-*d*) of 2m

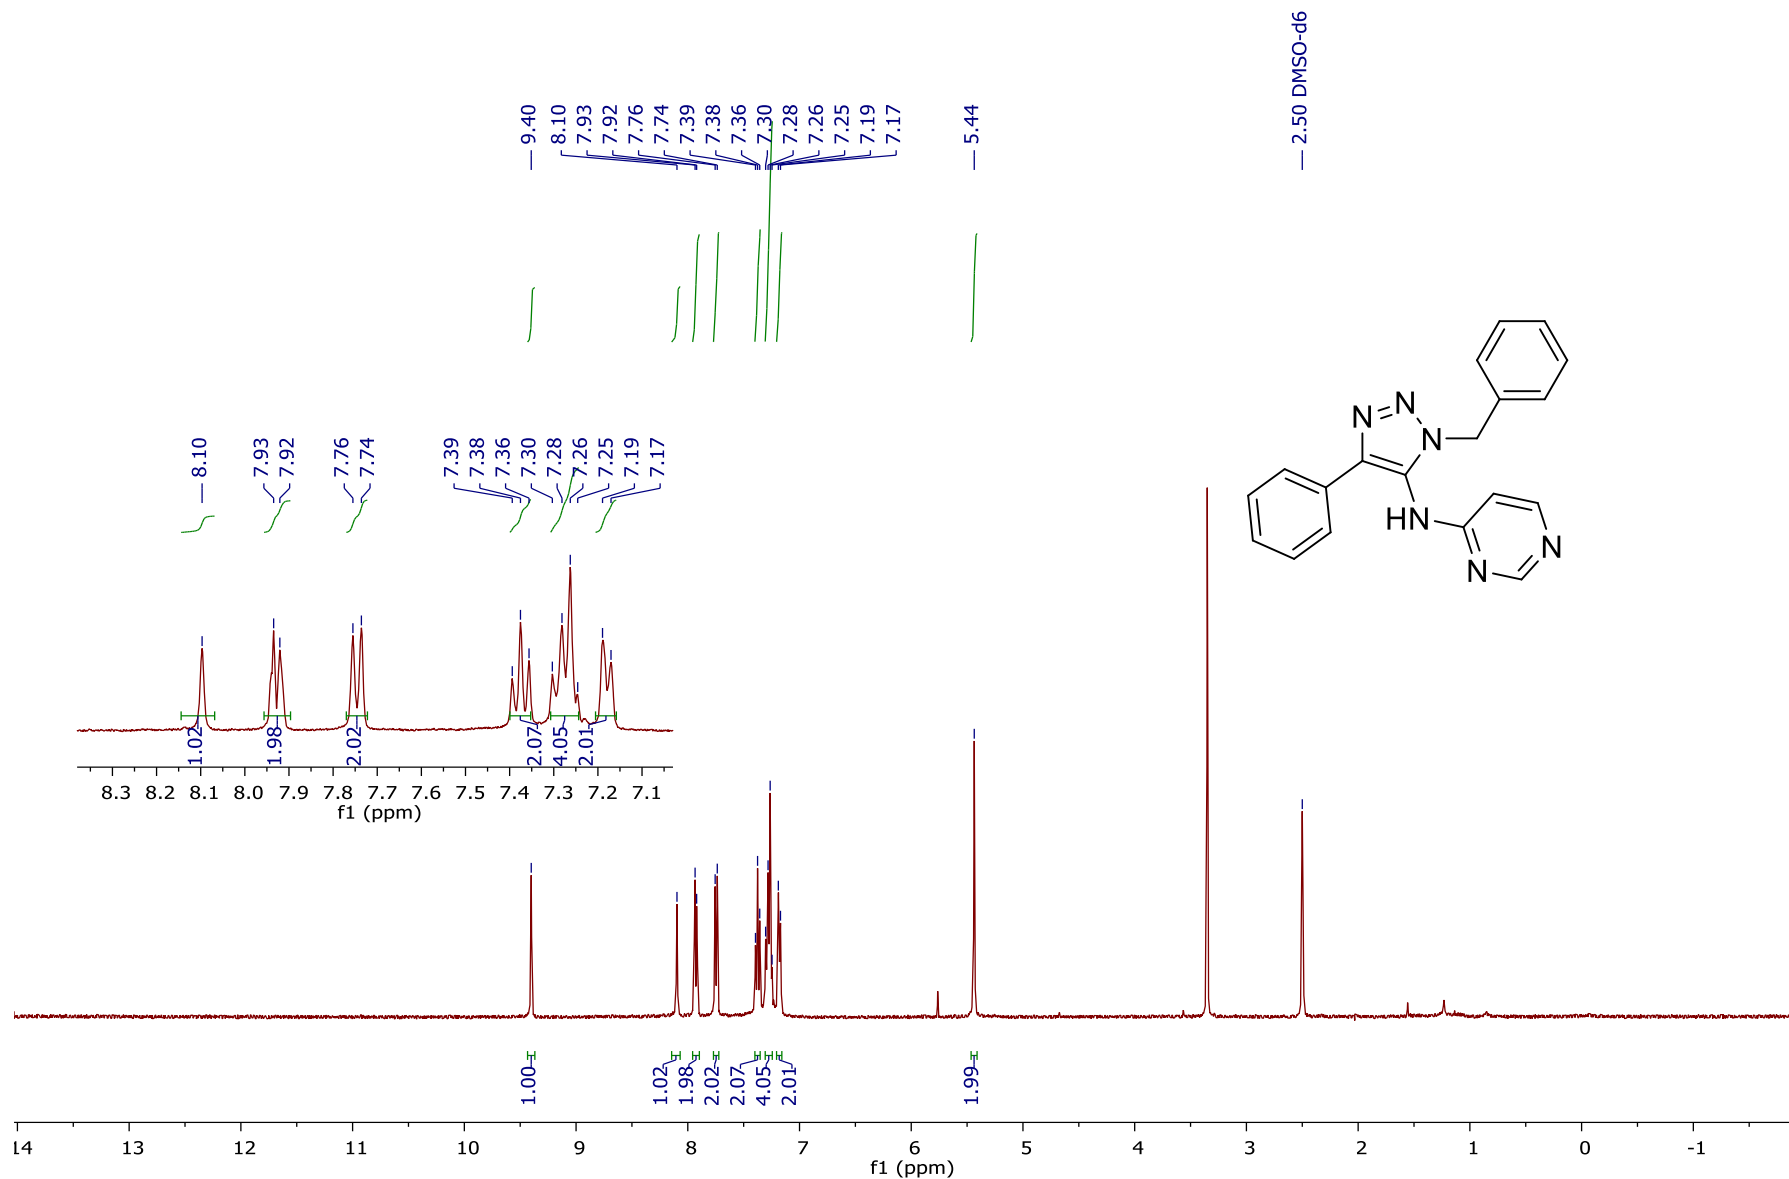

Figure S30. <sup>1</sup>H NMR (400 MHz, DMSO-*d*<sub>6</sub>) of 2n

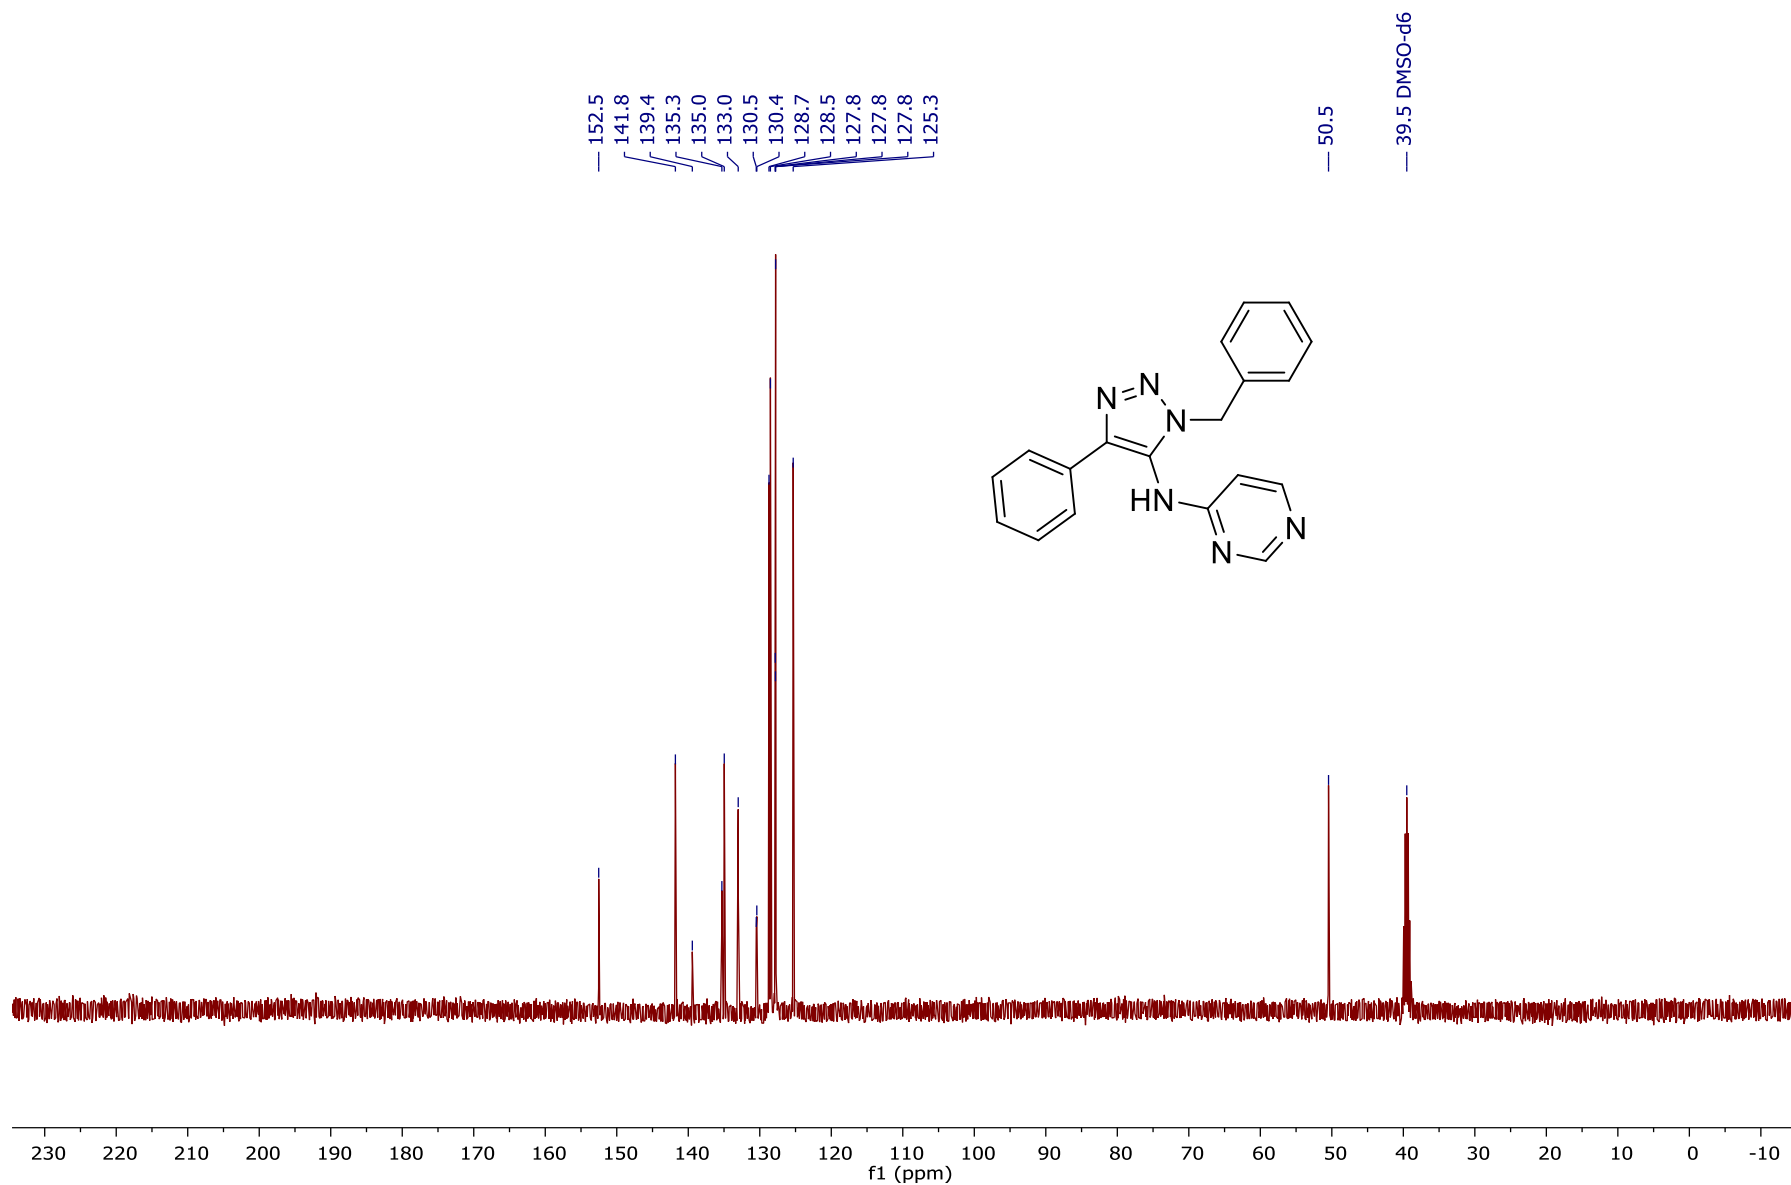

Figure S31.  $^{13}\text{C}\{^1\text{H}\}$  NMR (101 MHz, DMSO- $d_6$ ) of 2n



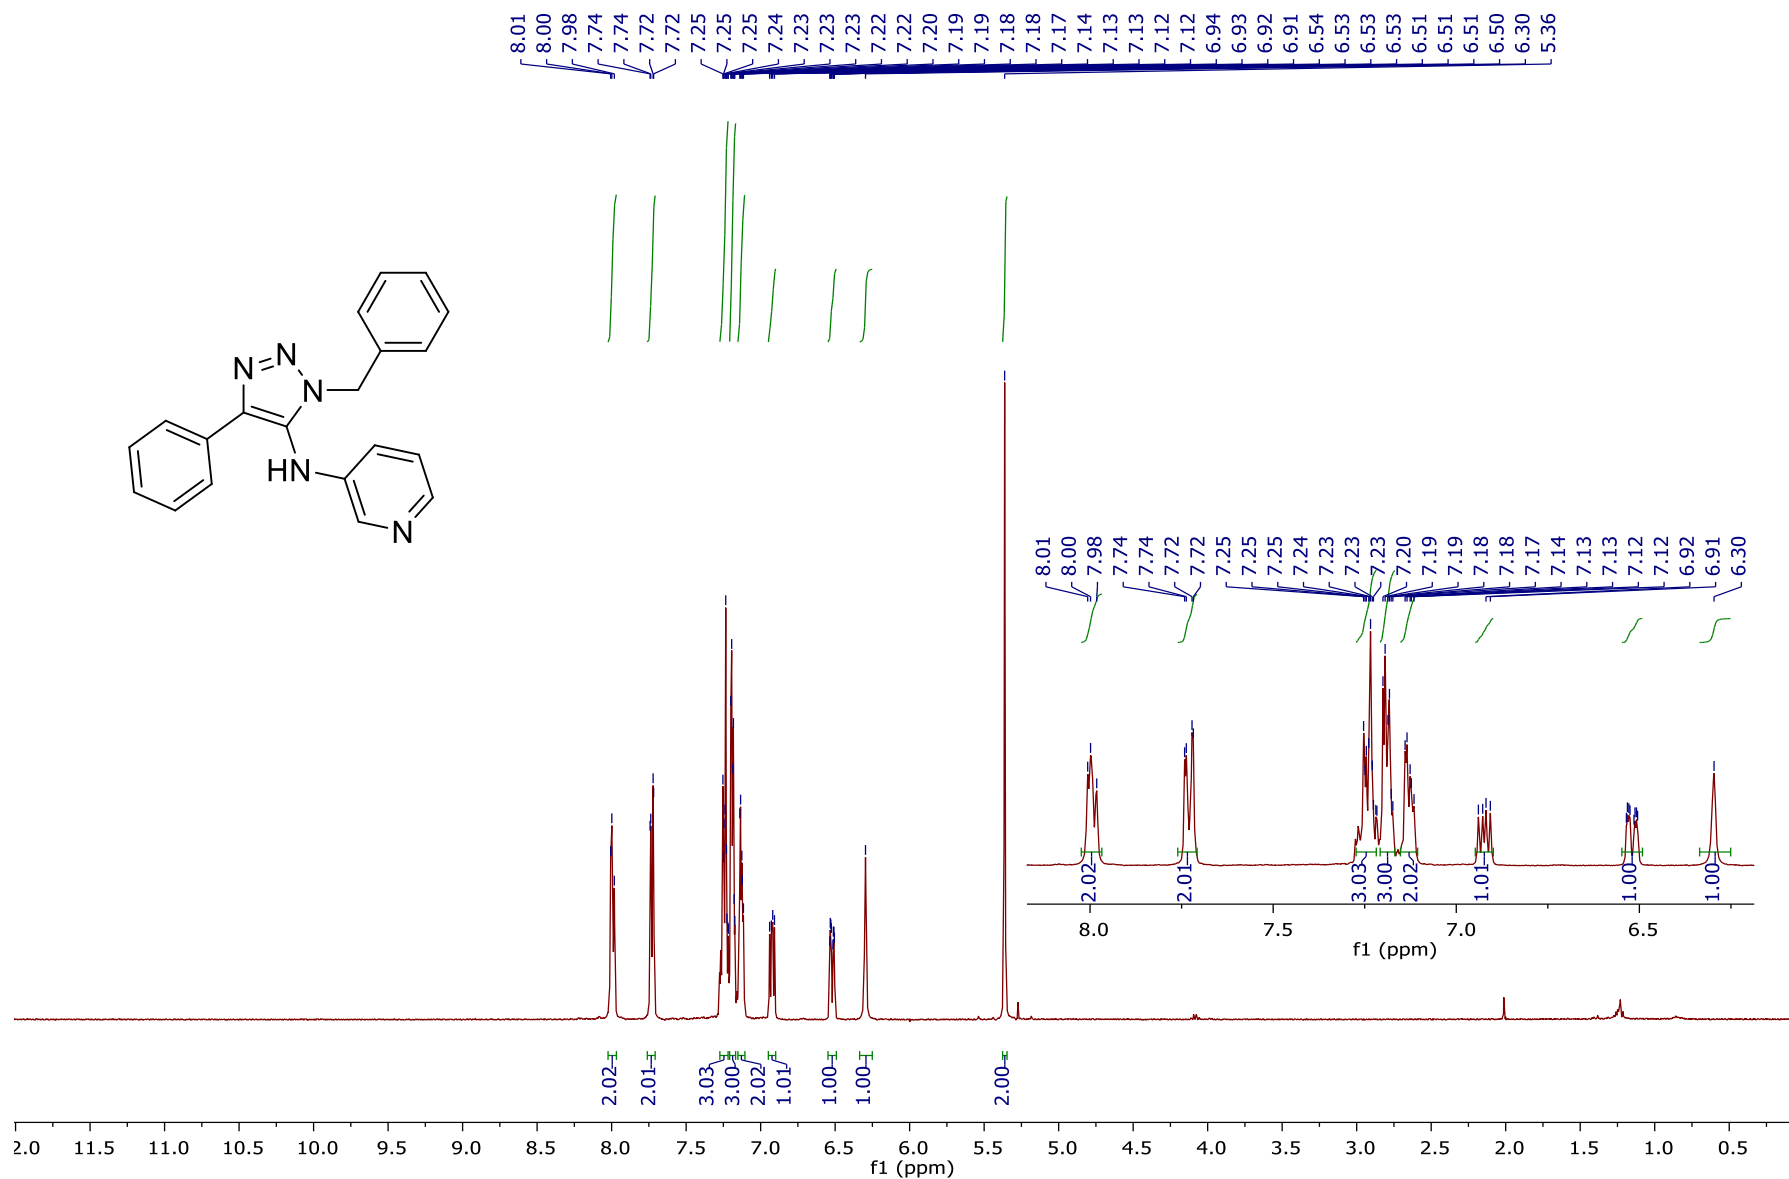

Figure S32.  $^1\text{H}$  NMR (400 MHz,  $\text{CDCl}_3$ ) of 2o

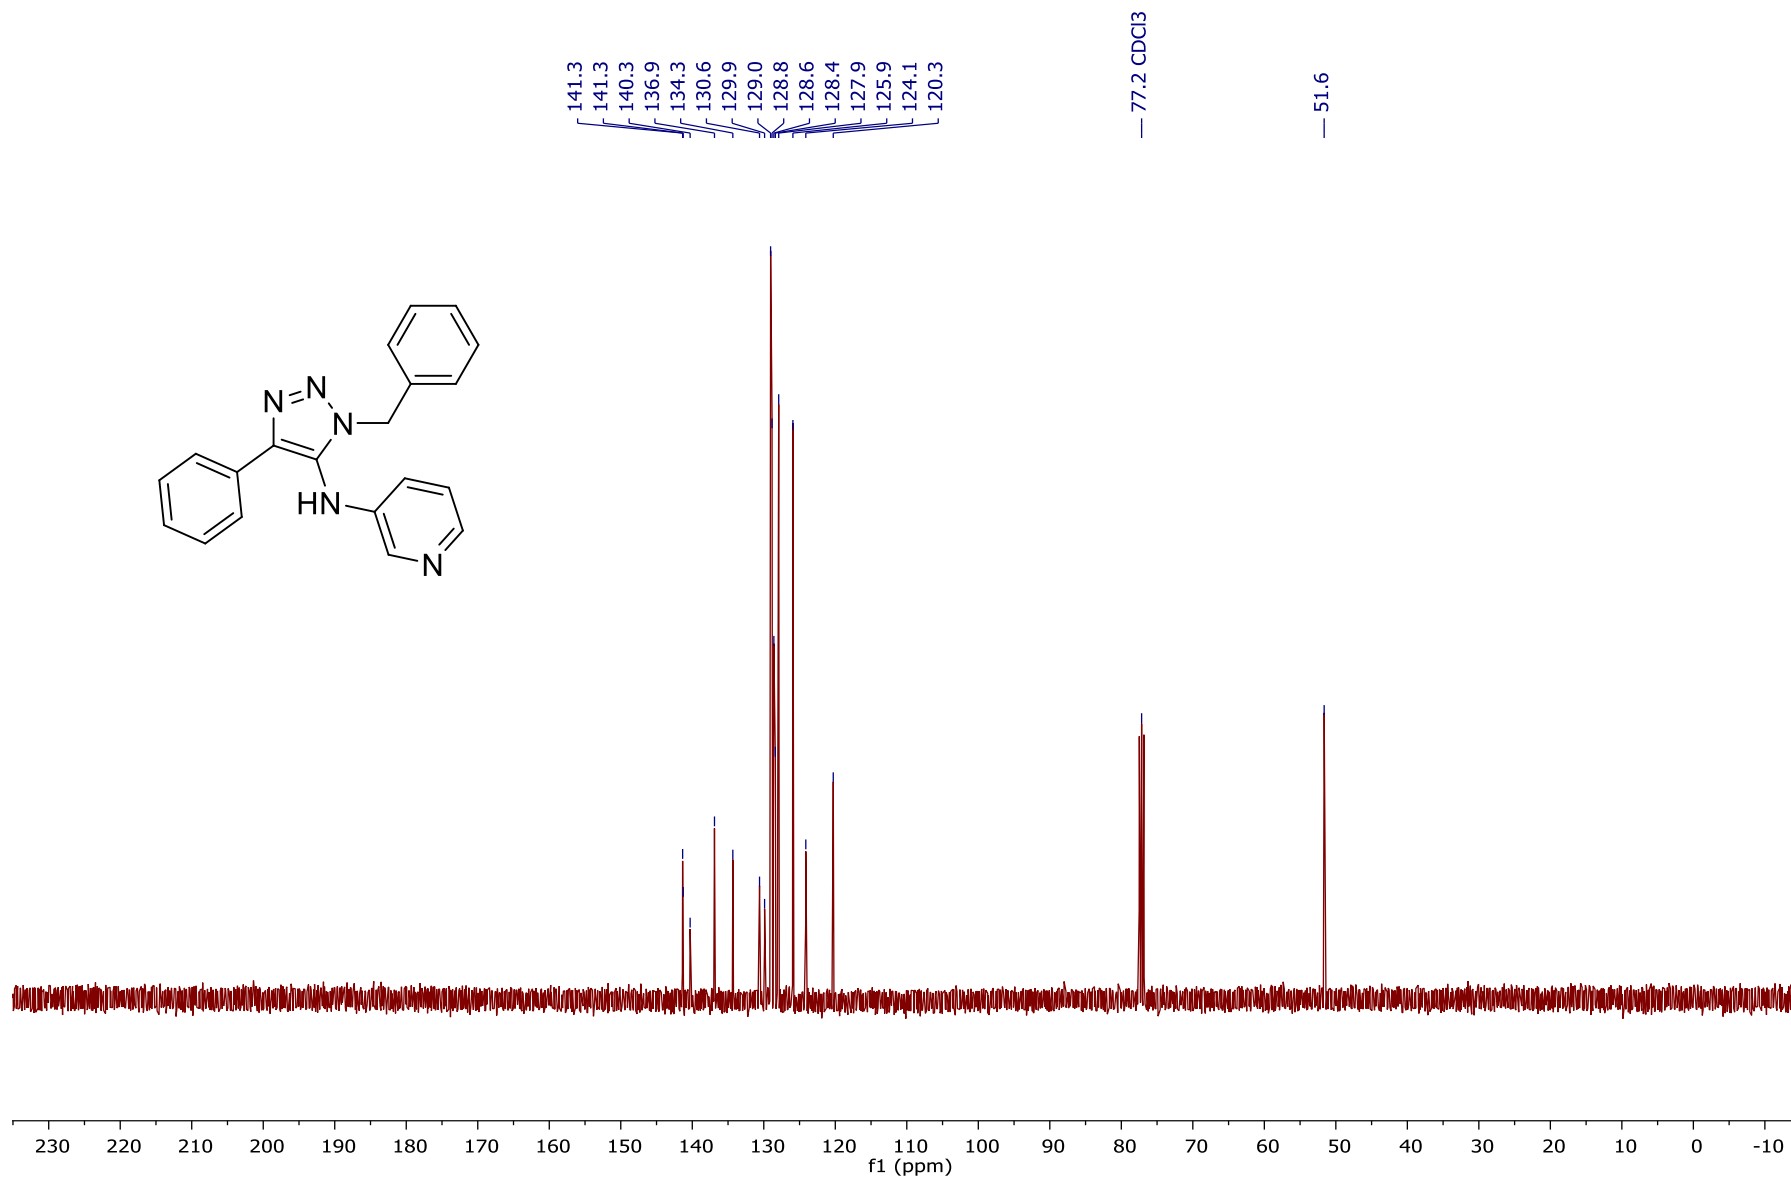

Figure S33.  $^{13}\text{C}\{^1\text{H}\}$  NMR (101 MHz,  $\text{Chloroform-}d$ ) of 2o

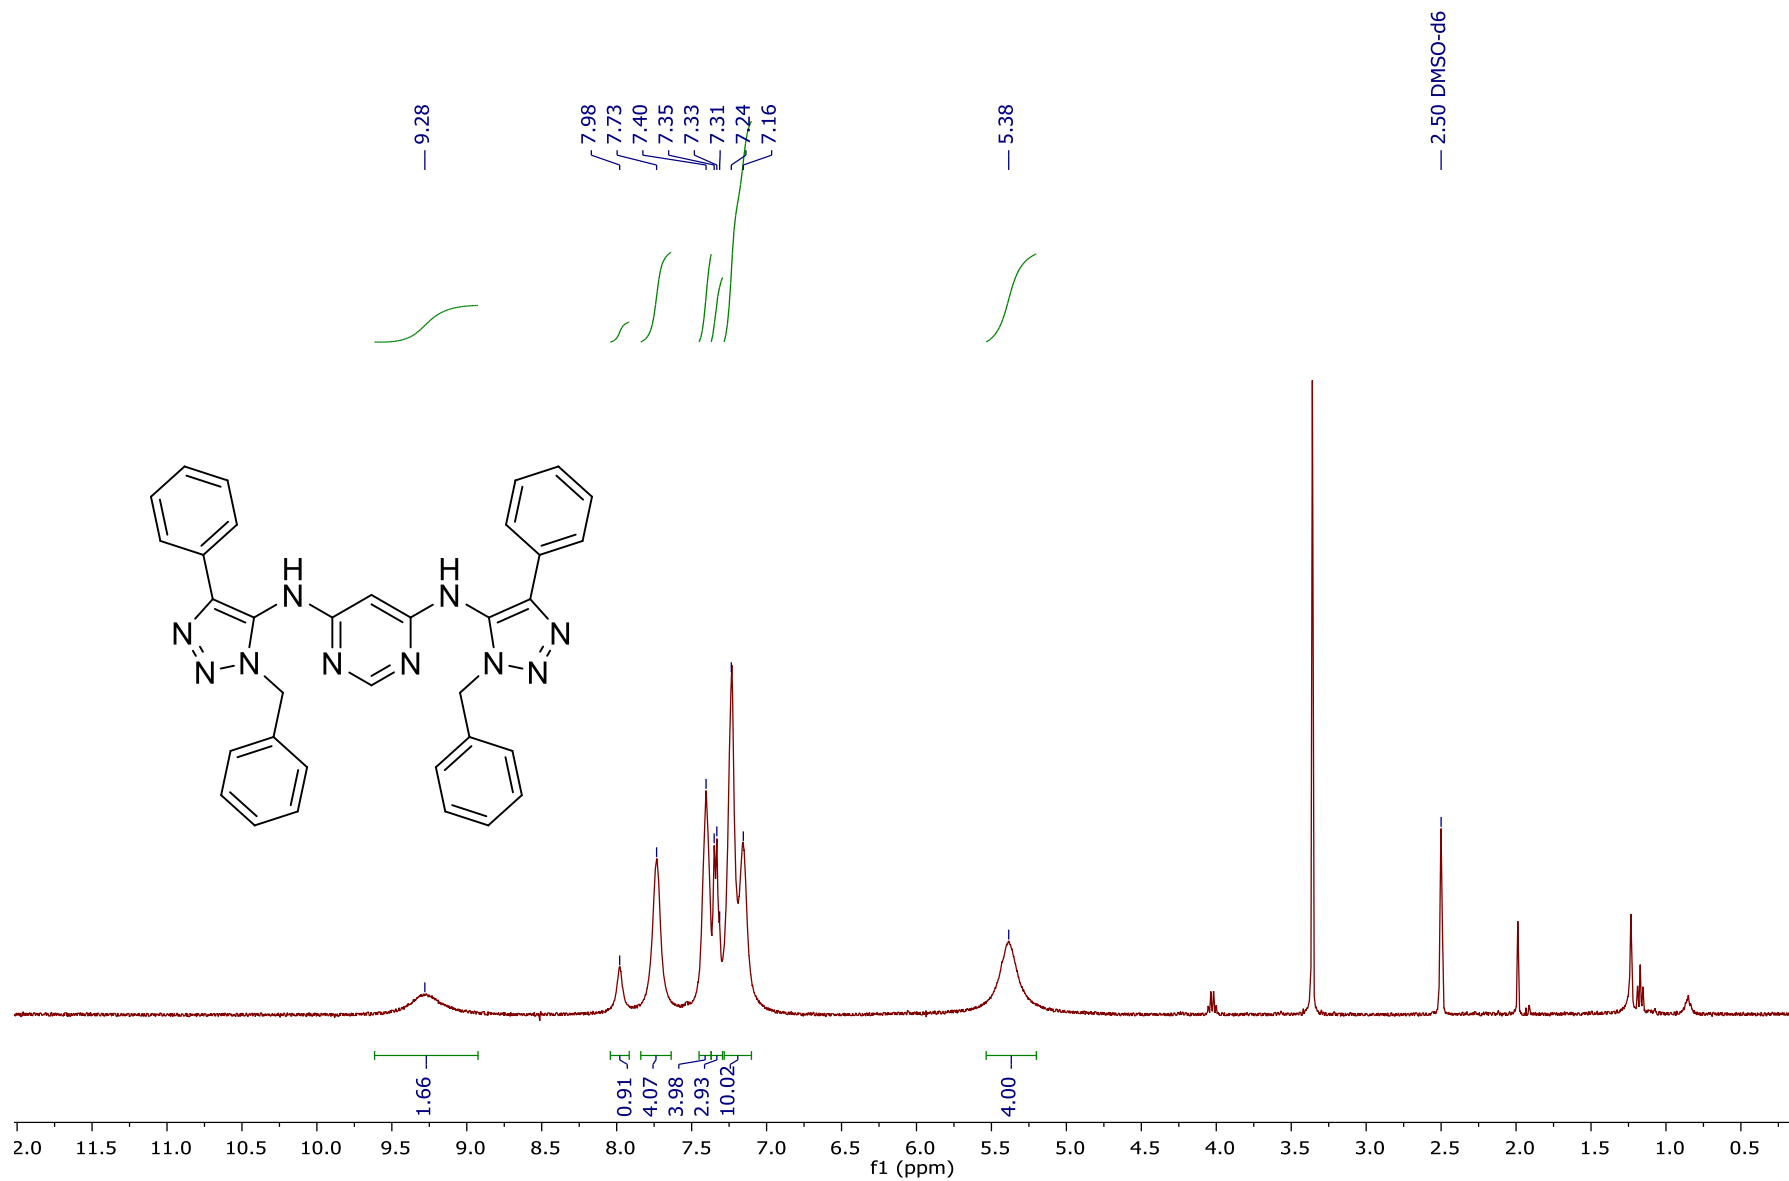

Figure S34. <sup>1</sup>H NMR (400 MHz, DMSO-*d*<sub>6</sub>) of 2p

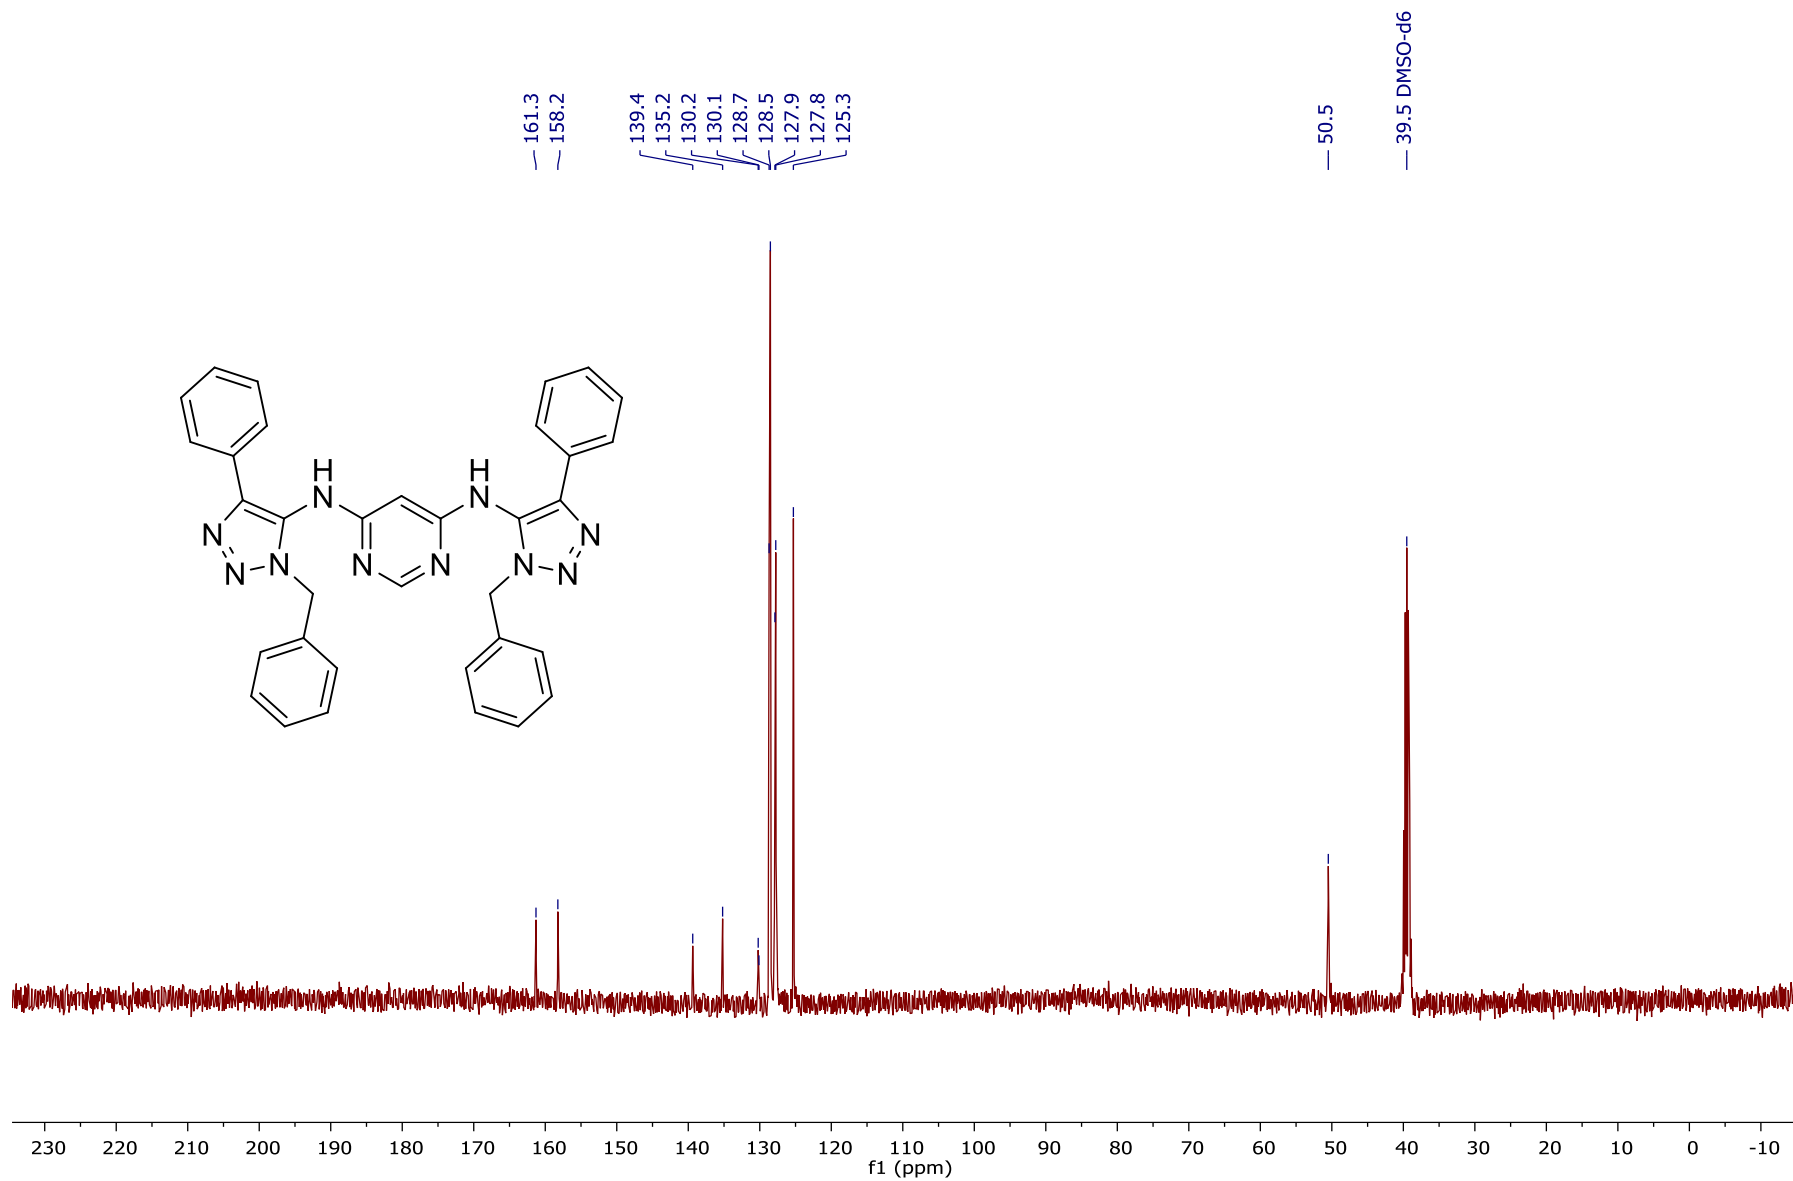

Figure S35.  $^{13}\text{C}\{^1\text{H}\}$  NMR (101 MHz,  $\text{DMSO}-d_6$ ) of 2p

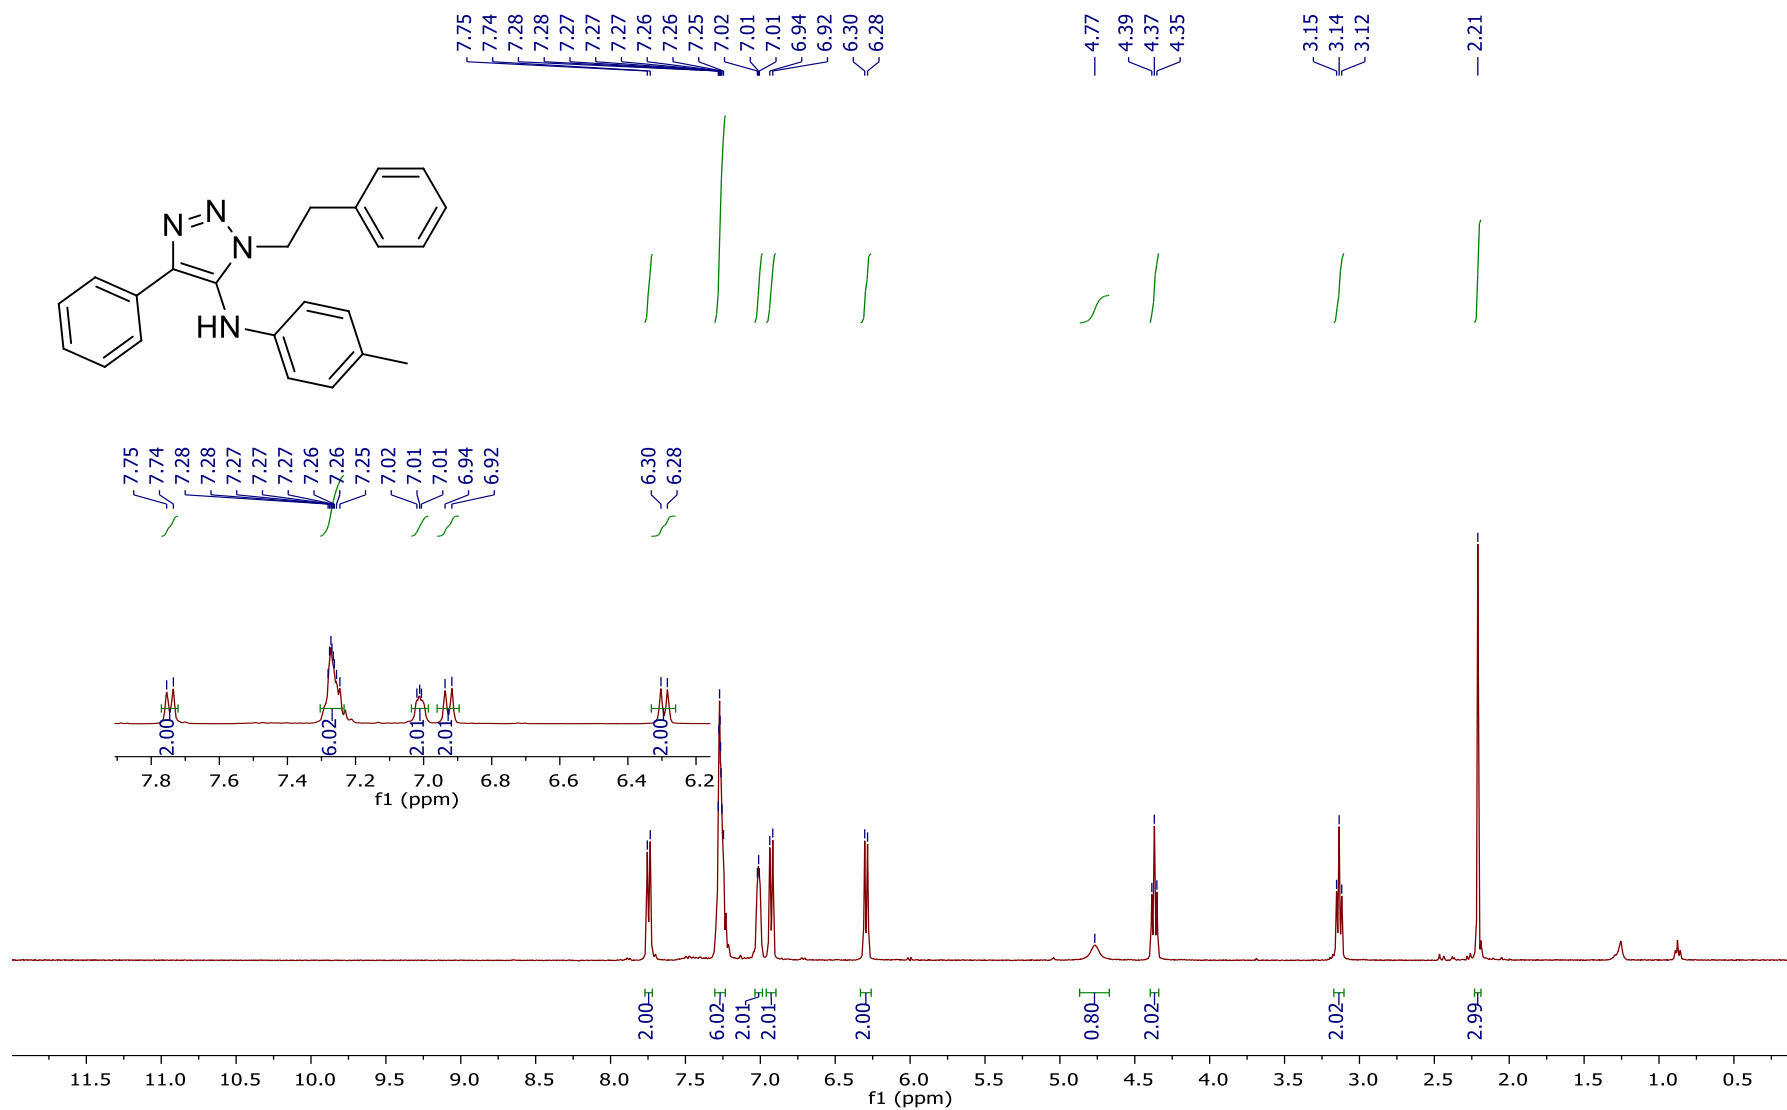

Figure S36. <sup>1</sup>H NMR (400 MHz, Chloroform-d) of 2q

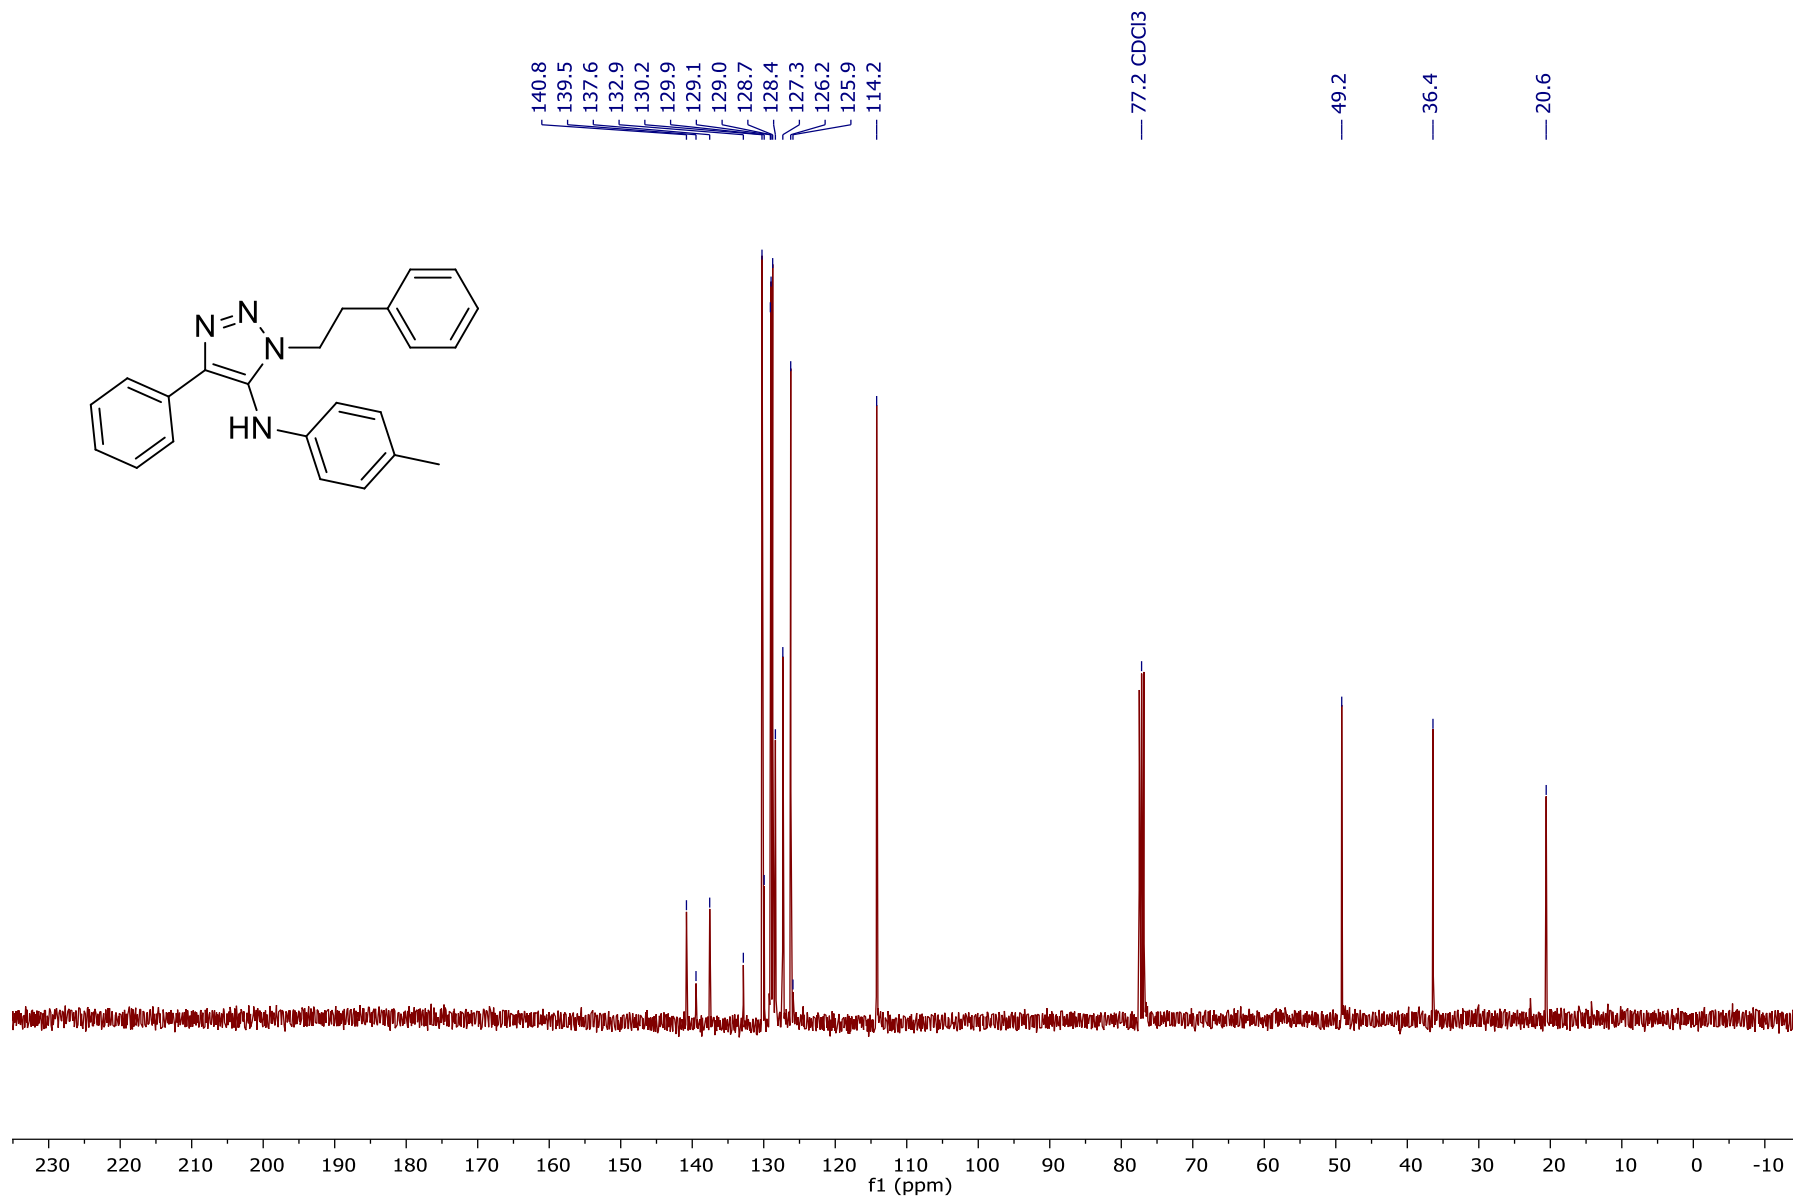

Figure S37.  $^{13}\text{C}\{^1\text{H}\}$  NMR (101 MHz,  $\text{Chloroform-}d$ ) of 2q



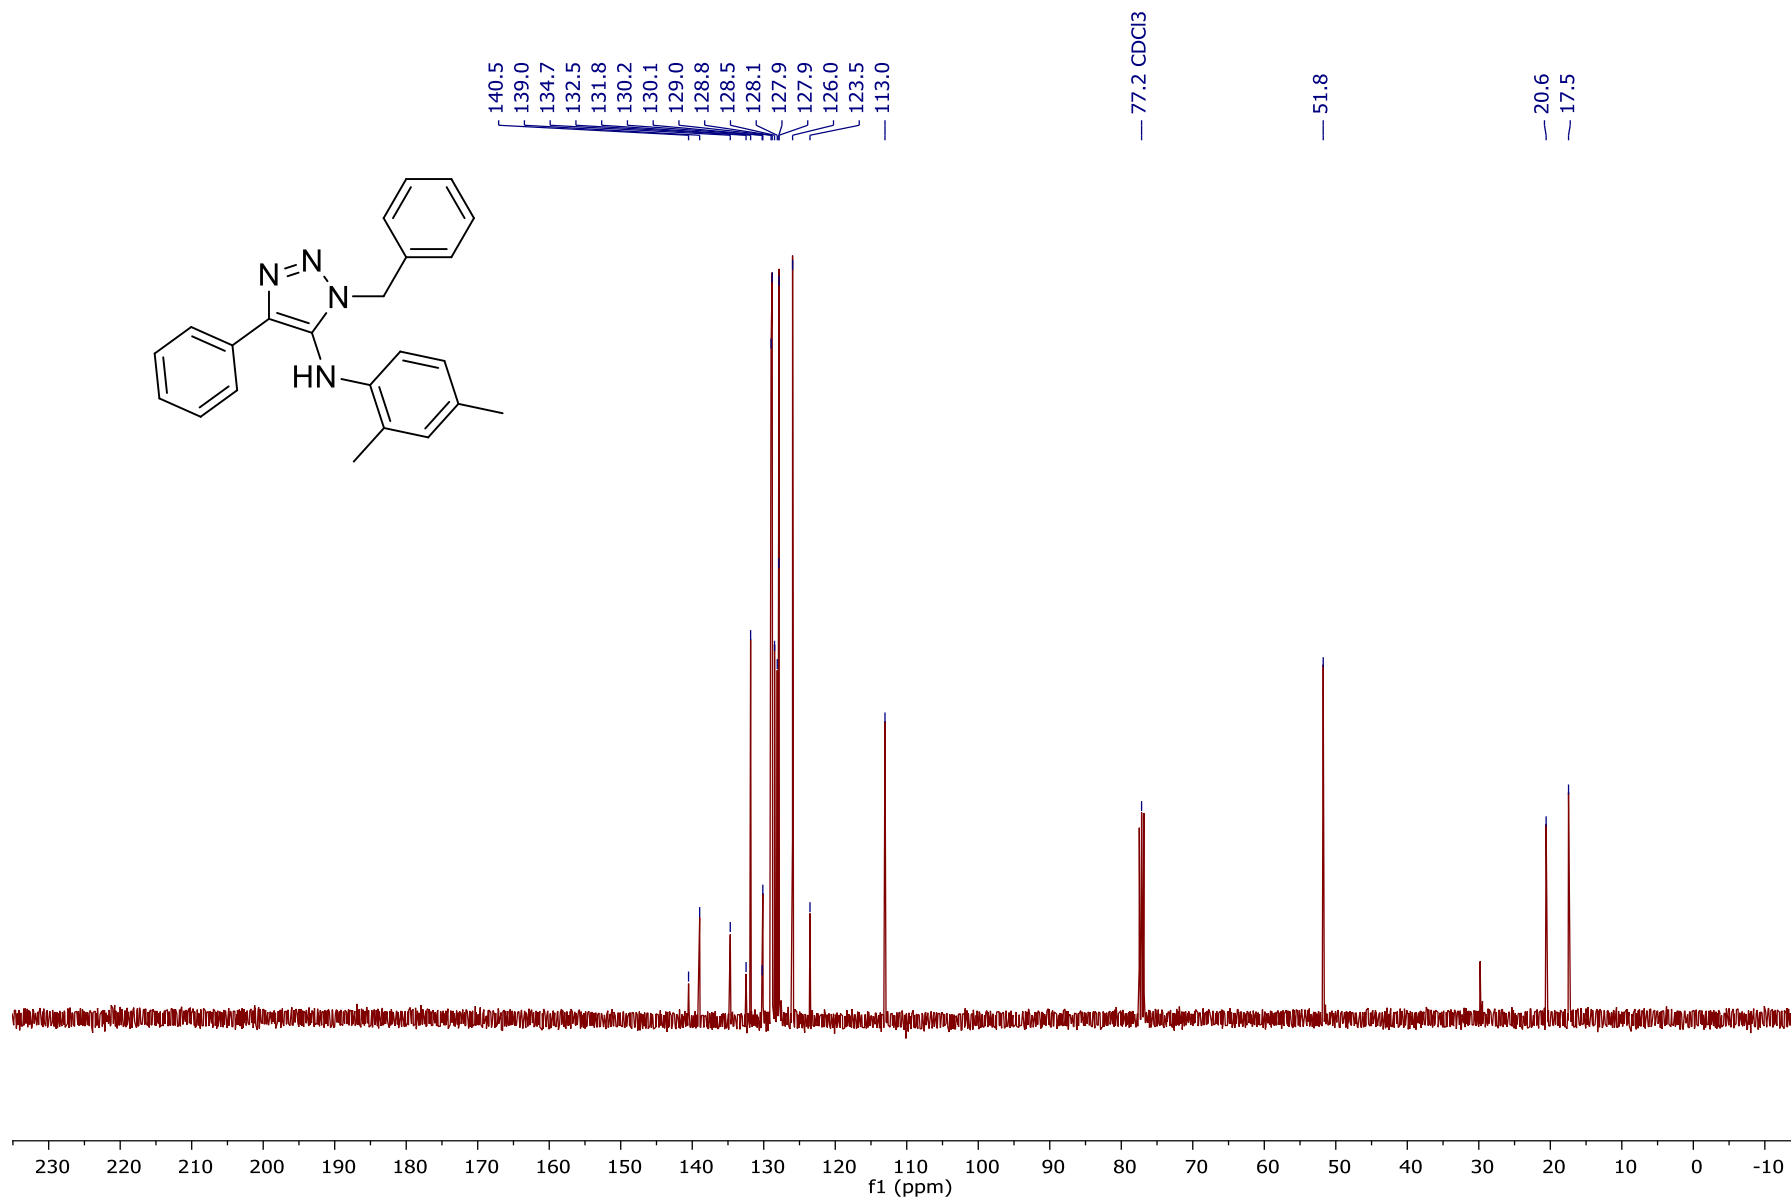

Figure S39.  $^{13}\text{C}\{^1\text{H}\}$  NMR (101 MHz,  $\text{Chloroform-}d$ ) of 2r



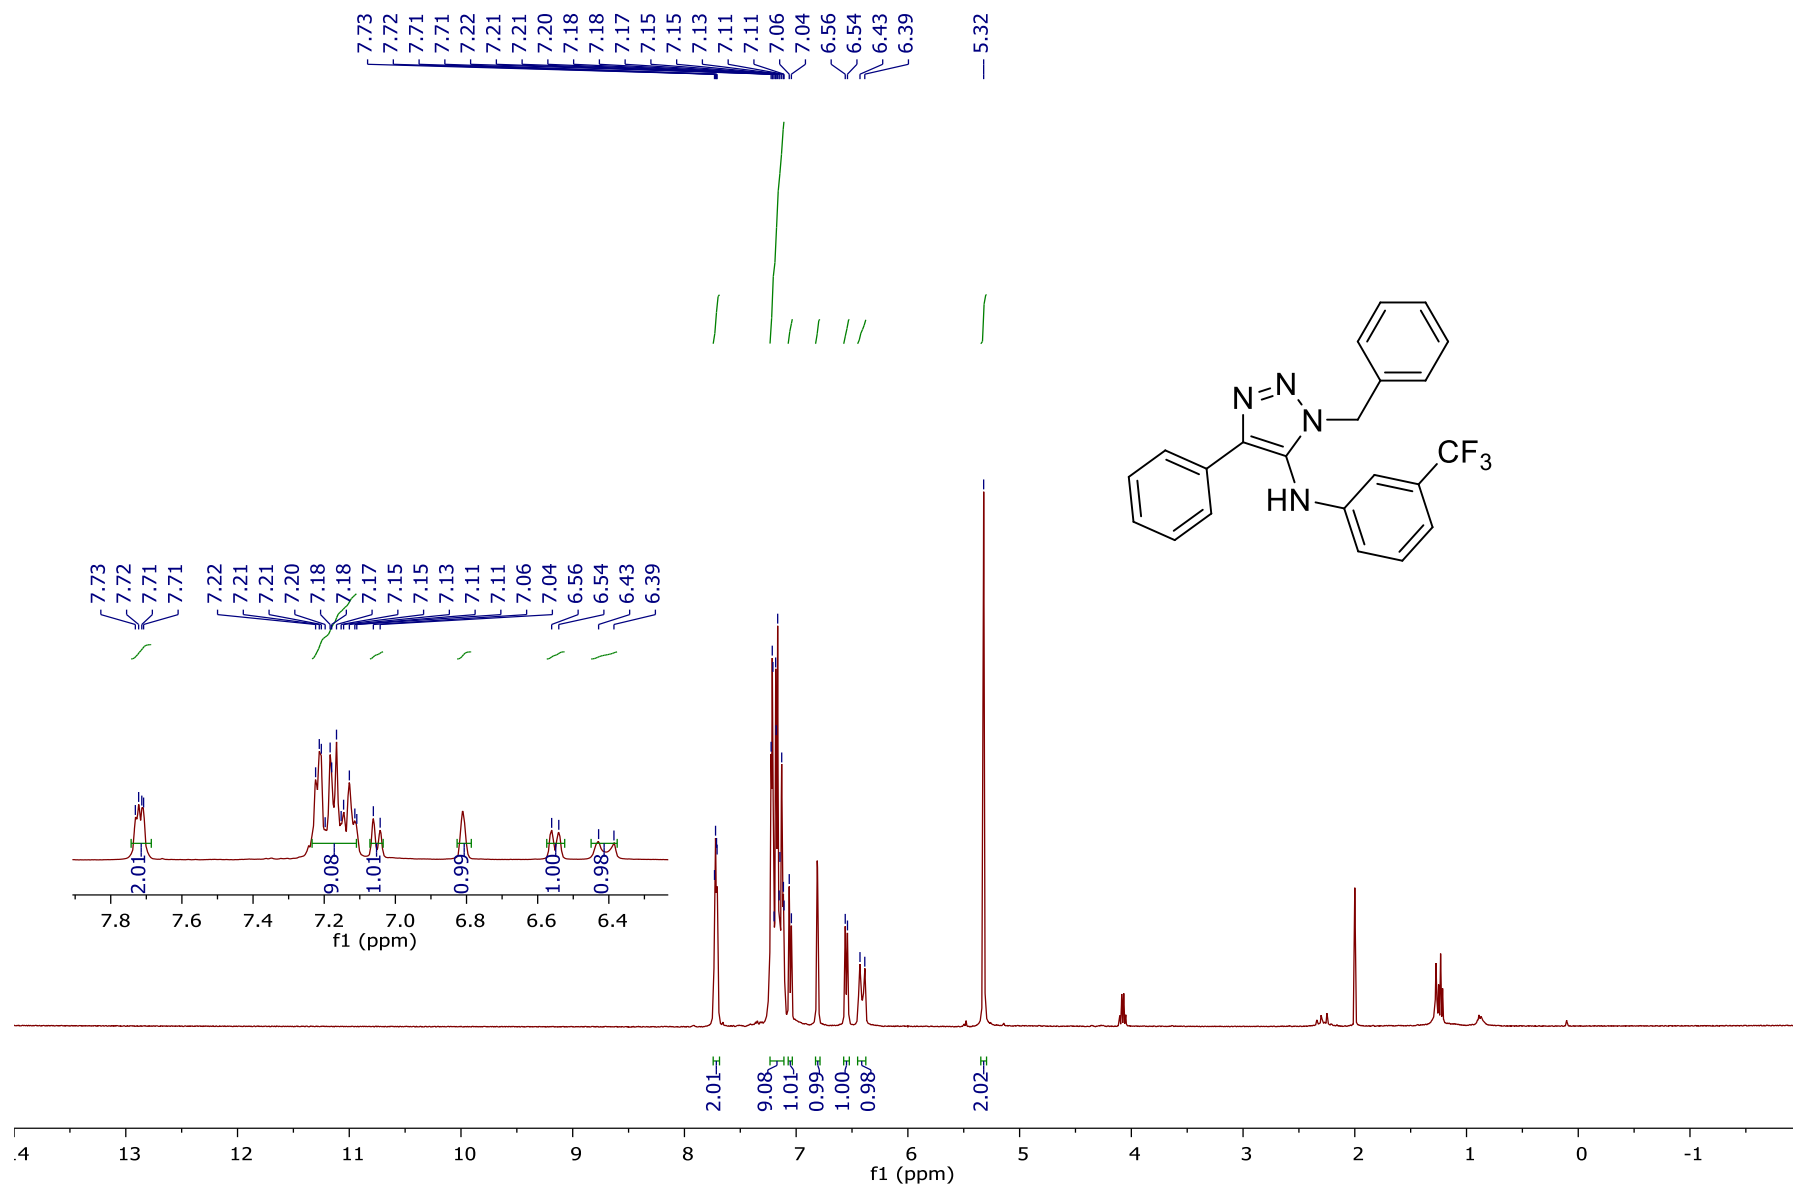

Figure S40. <sup>1</sup>H NMR (400 MHz, Chloroform-*d*) of 2s

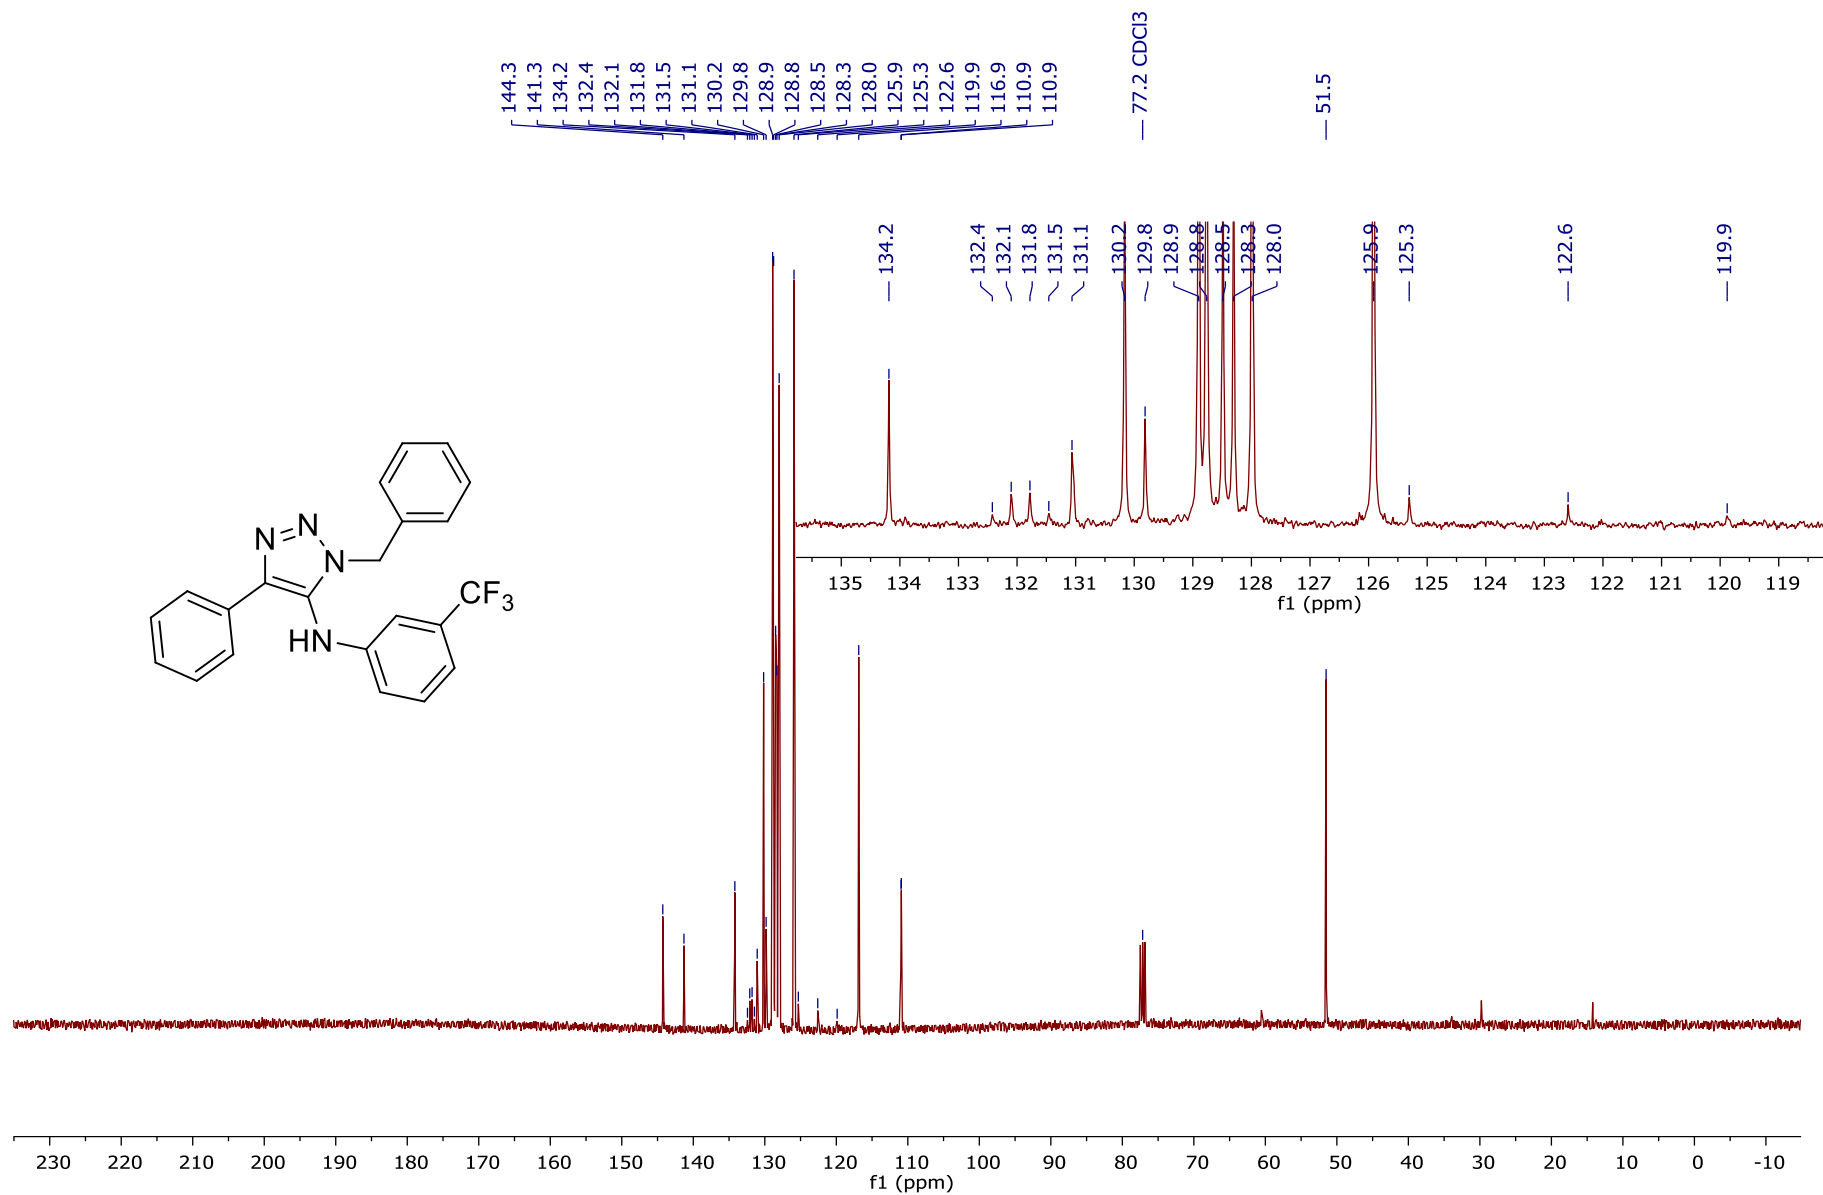

Figure S41.  $^{13}\text{C}\{^1\text{H}\}$  NMR (101 MHz, Chloroform-*d*) of 2s

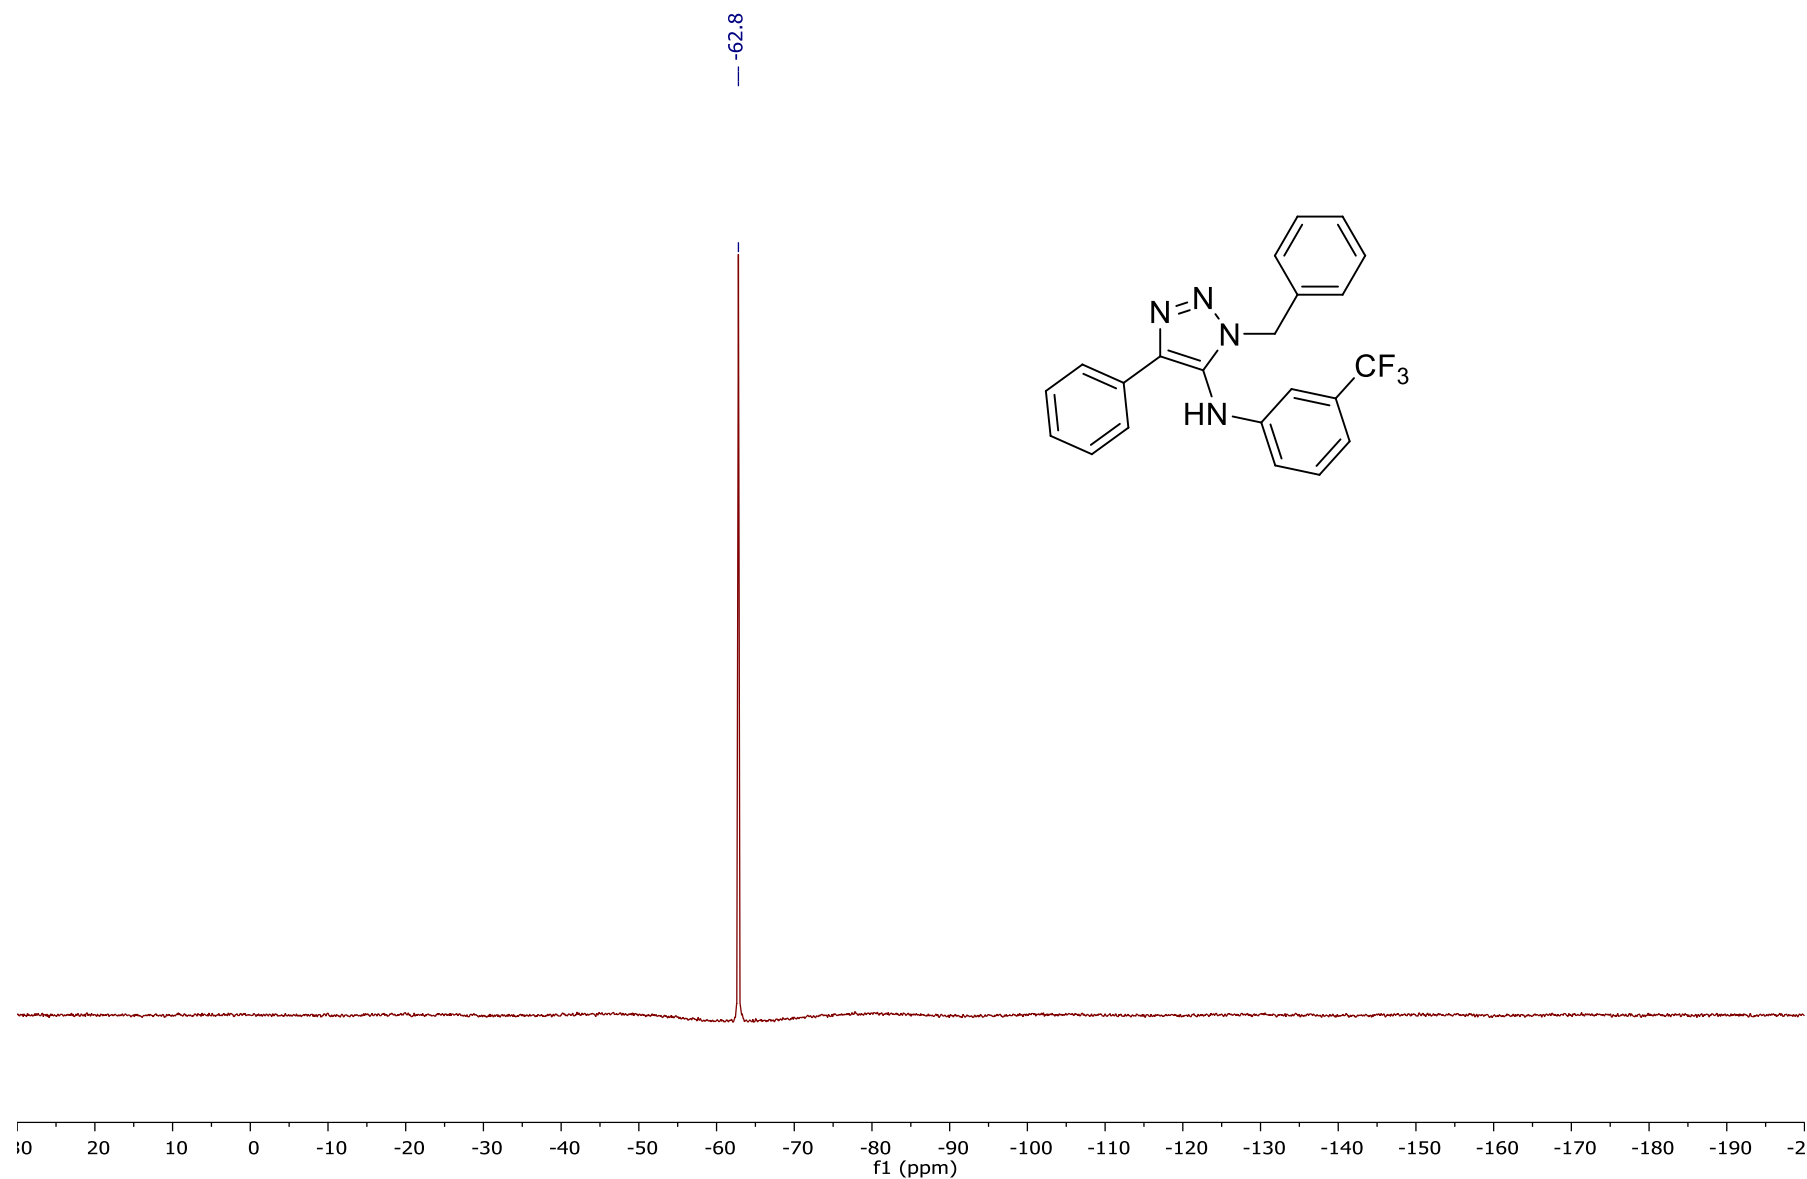

Figure S42.  $^{19}\text{F}$  NMR (376 MHz, Chloroform- $d$ ) of **2s**

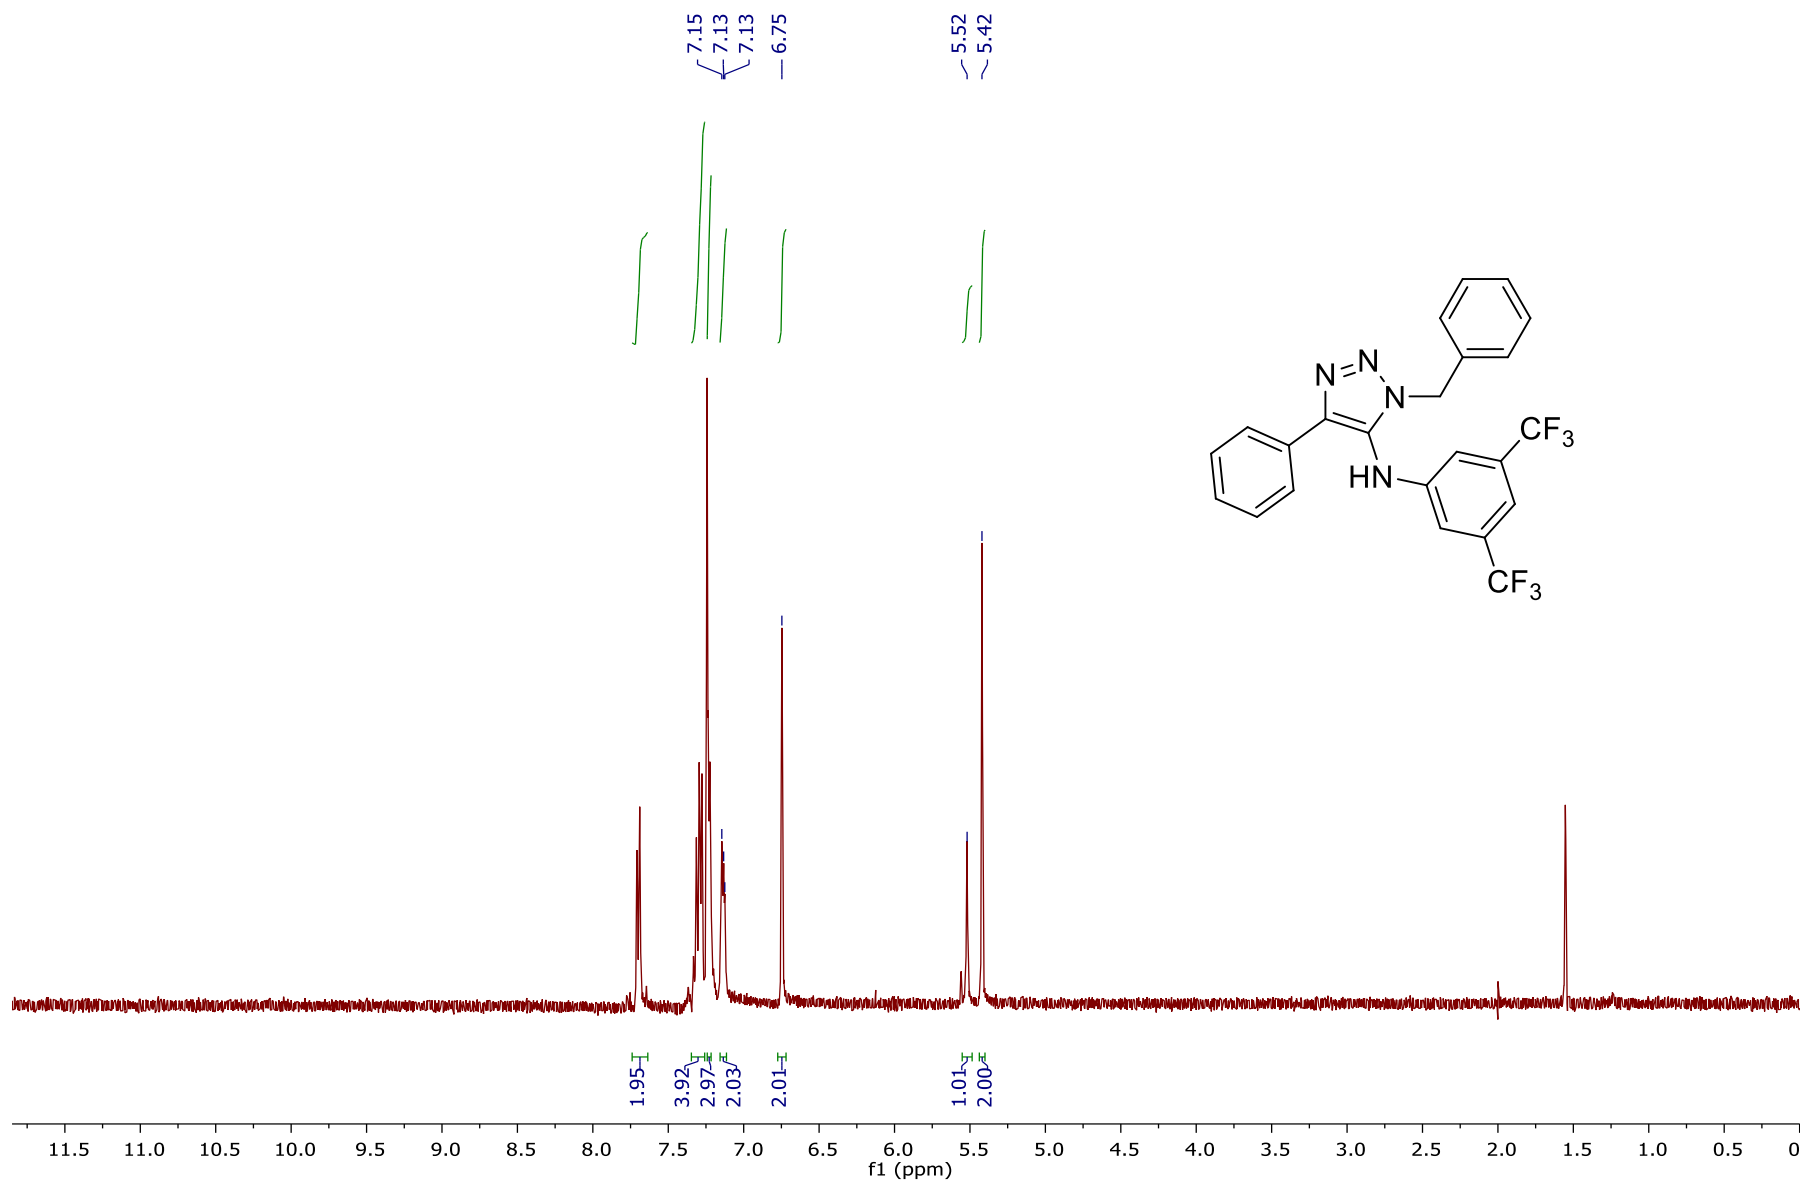

Figure S43. <sup>1</sup>H NMR (400 MHz, Chloroform-*d*) of 2t



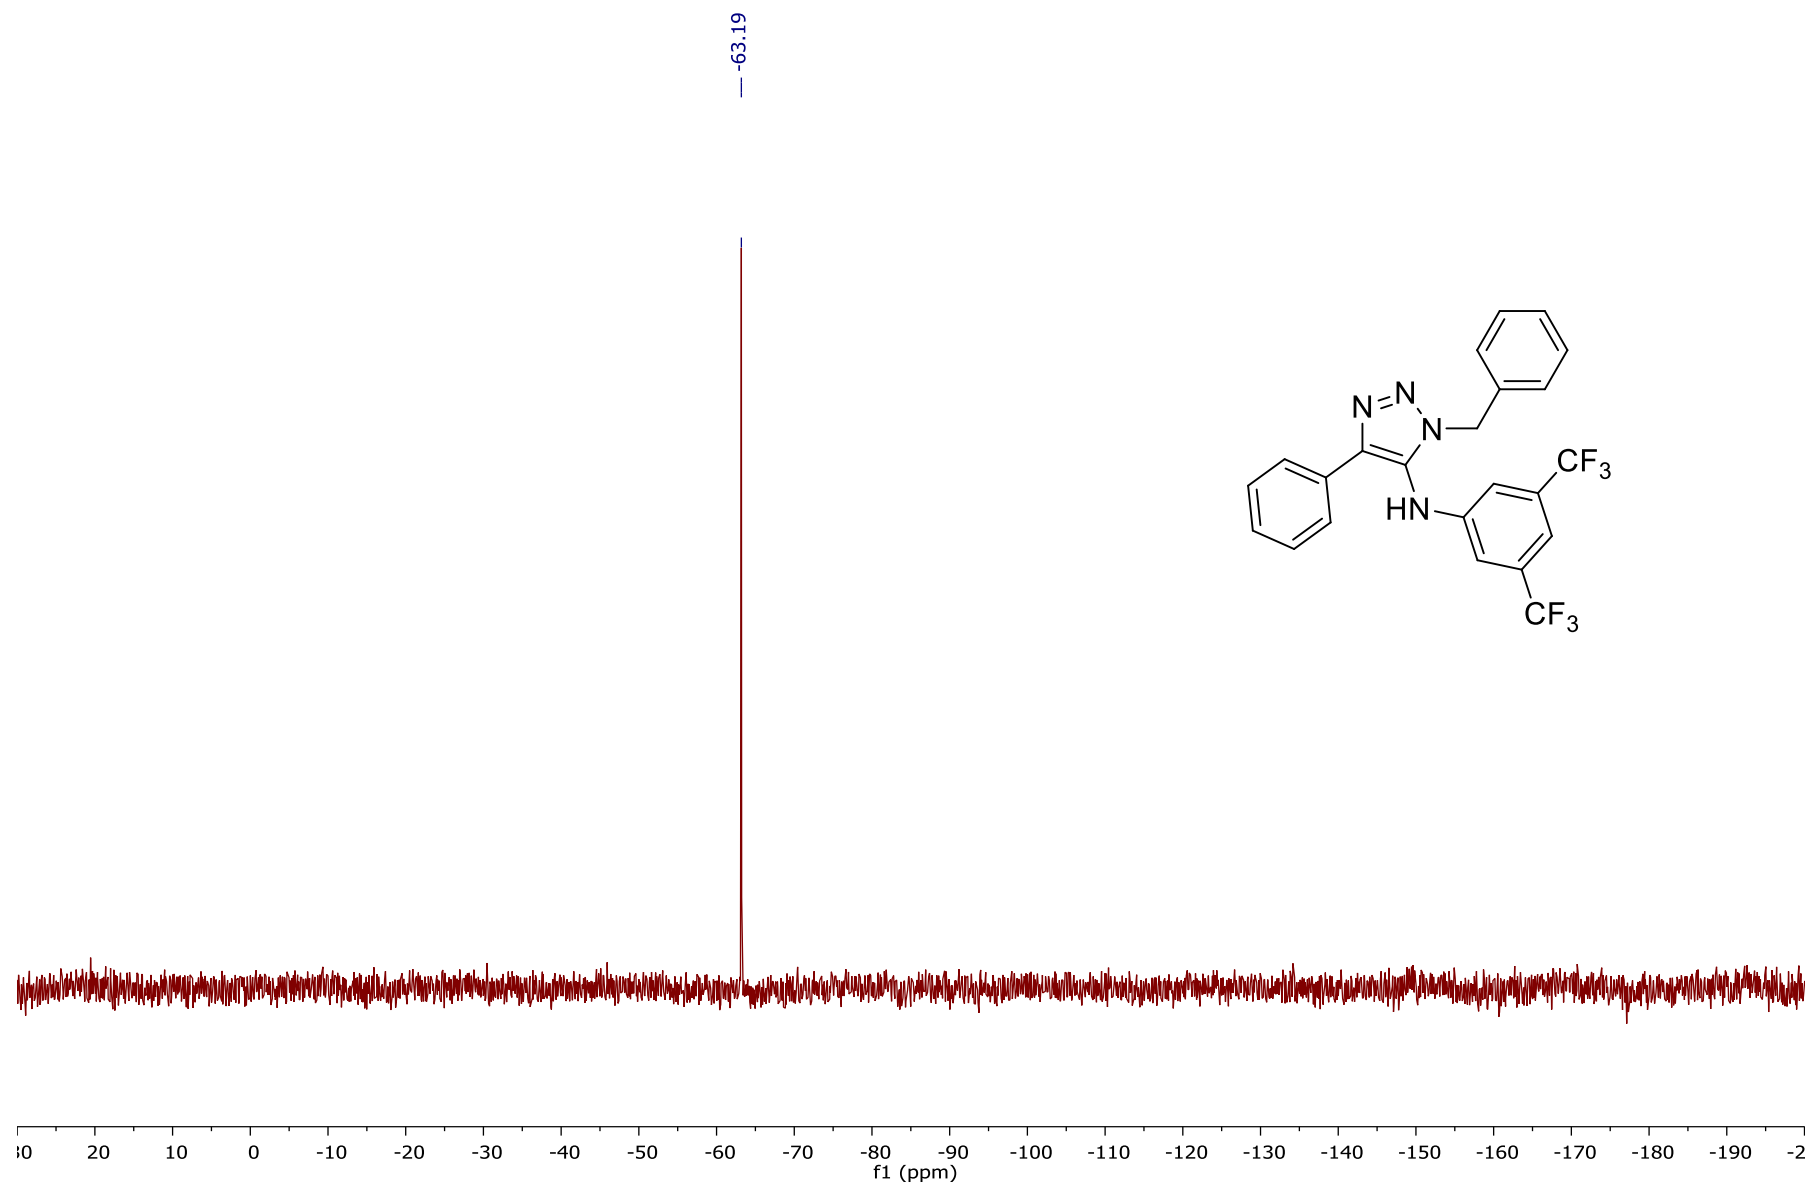

**Figure S45.**  $^{19}\text{F}$  NMR (376 MHz,  $\text{Chloroform-}d$ ) of **2t**

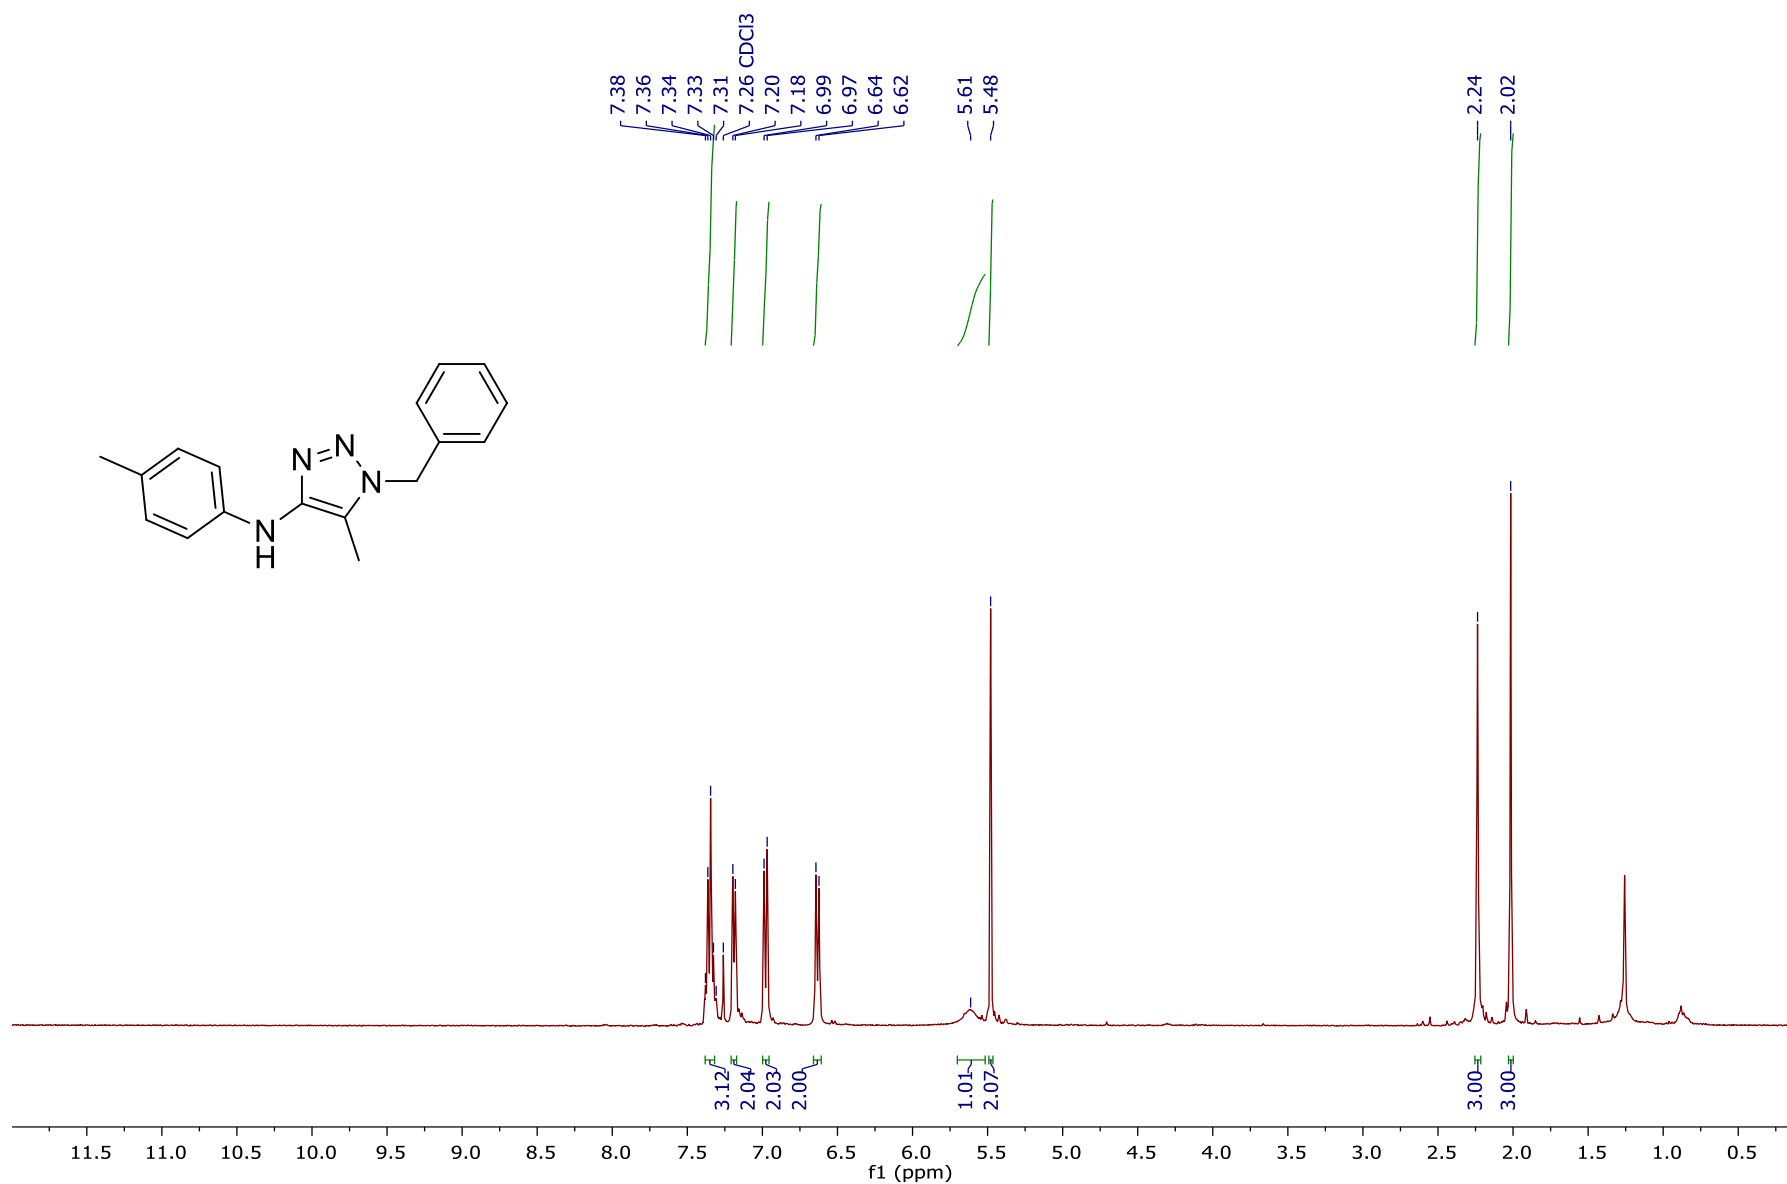

Figure S46. <sup>1</sup>H NMR (400 MHz, Chloroform-*d*) of 2u

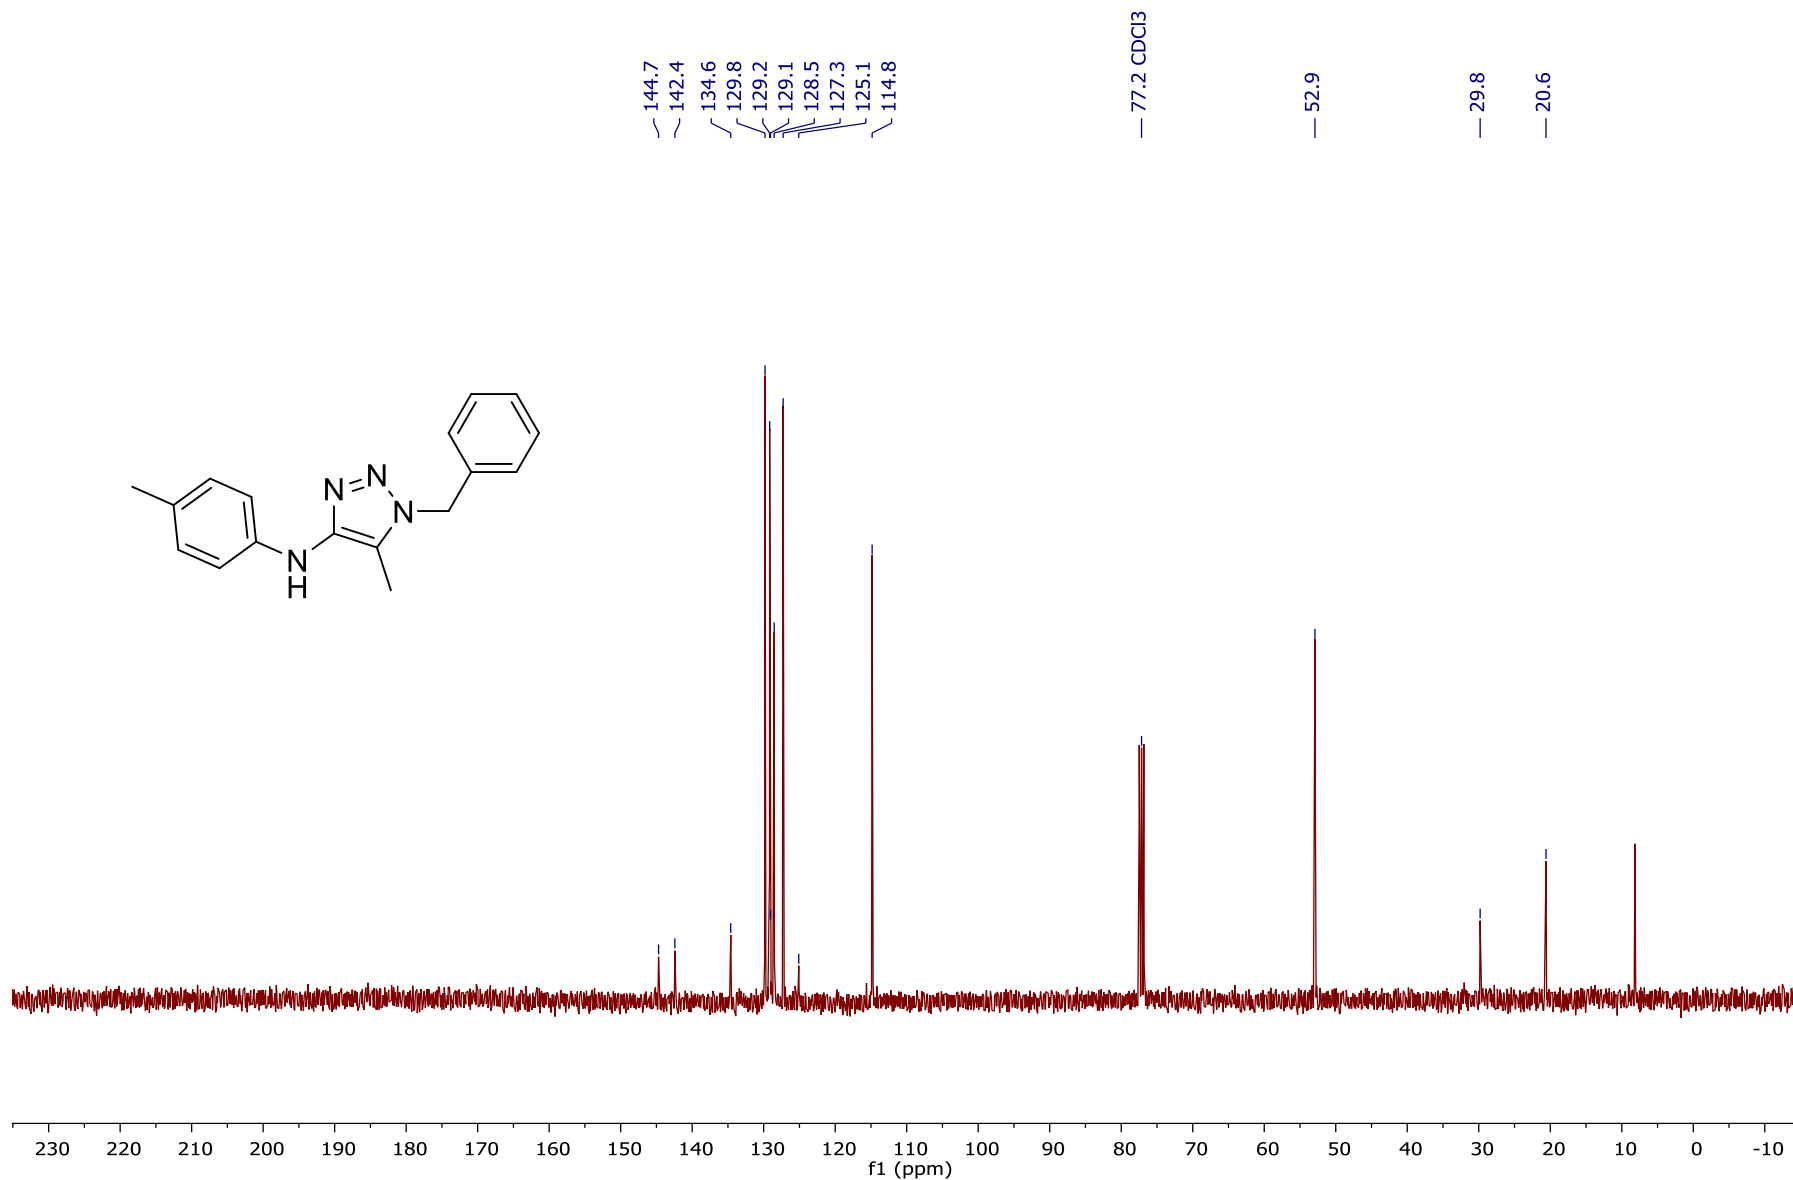

Figure S47.  $^{13}\text{C}\{^1\text{H}\}$  NMR (101 MHz, Chloroform-*d*) of 2u
